# Supplementary material
Source: publisher figshare collection journal article supplement (https://gsapubs.figshare.com/articles/dataset/_/24128754)
Supplement: Supplementary file 1 [file 1]

## Sheet: Data
Section	Group	Profile	Shelf Break depth	Shelf Width (km)	Slope Width (km) to the -2000 m	Upper Slope angle (°)	Shelf Slope (°)	upper Shelf slope (°)	Lower Shelf slope (°)	Distance between the shelf break and the LGM sea-level (km)	Distance between the shelf break and the mean sea-level (km)	Shoreline UTM X	Shoreline UTM Y	Shelfbreak UTM X	Shelfbreak UTM Y	2000 m isobath UTM X	2000 m isobath UTM Y
1	1	1	-195.783	34.3054	18.716	3.11294	0.326987	0.304562	0.370142	11.7306	24.8856	232020	5.86561e+06	257563	5.84271e+06	271498	5.83022e+06
1	1	2	-170.706	24.1914	12.9498	6.60892	0.4043	0.505571	0.274276	10.5923	19.492	232951	5.84536e+06	257101	5.84395e+06	270029	5.8432e+06
1	1	3	-171.95	25.1957	11.7407	7.49026	0.391013	0.489498	0.266948	11.1501	20.9843	232277	5.84345e+06	257426	5.84497e+06	269146	5.84568e+06
1	1	4	-159.421	25.0358	11.4625	8.51739	0.36484	0.497869	0.201195	11.2263	20.2521	232708	5.8495e+06	257632	5.84713e+06	269043	5.84605e+06
1	1	5	-182.17	36.7859	13.7515	8.14926	0.283736	0.260871	0.341514	10.4301	24.1125	231075	5.87269e+06	259151	5.84892e+06	269647	5.84004e+06
1	1	6	-168.037	30.5961	10.9362	9.1259	0.314671	0.346229	0.256309	10.7381	22.2713	231440	5.86272e+06	259266	5.85e+06	269212	5.84545e+06
1	1	7	-171.791	30.7568	10.6351	9.38951	0.32002	0.346938	0.271255	10.9394	22.6056	230795	5.86103e+06	259853	5.85095e+06	269900	5.84746e+06
1	1	8	-172.183	36.2603	10.1677	10.1761	0.272068	0.250427	0.339544	8.80544	23.486	229671	5.87107e+06	260444	5.85189e+06	269073	5.84651e+06
1	1	9	-157.485	27.3973	10.8822	8.92061	0.329344	0.412334	0.200292	10.723	22.8372	232367	5.85144e+06	259708	5.8532e+06	270567	5.8539e+06
1	1	10	-163.181	29.5851	10.011	10.5002	0.316021	0.370316	0.224534	11.0188	22.8649	231051	5.85591e+06	260579	5.85407e+06	270571	5.85345e+06
1	1	11	-168.422	31.2579	11.5622	9.35282	0.308715	0.301786	0.327341	8.47545	26.5562	236859	5.87466e+06	261171	5.85502e+06	270164	5.84775e+06
1	1	12	-166.662	30.4635	9.69927	11.2038	0.313456	0.313629	0.313014	8.54128	22.9812	232046	5.86521e+06	261426	5.85716e+06	270781	5.8546e+06
1	1	13	-166.053	30.9557	12.9176	7.85571	0.307344	0.29864	0.332603	7.93323	22.2657	230472	5.86017e+06	261371	5.85829e+06	274264	5.8575e+06
1	1	14	-156.314	30.4137	10.8516	9.47117	0.294475	0.2821	0.344403	6.0413	23.0208	230976	5.86135e+06	261389	5.86161e+06	272240	5.8617e+06
1	1	15	-154.947	29.8863	10.9891	8.64305	0.297052	0.282848	0.358941	5.57839	22.1012	231503	5.86284e+06	261389	5.86272e+06	272378	5.86267e+06
1	1	16	-151.586	29.4789	10.9304	8.55893	0.294623	0.287733	0.324109	5.58371	22.1828	231895	5.86363e+06	261374	5.86383e+06	272304	5.8639e+06
1	1	17	-163.346	25.1546	10.5499	9.59348	0.372054	0.367011	0.386768	6.4211	22.6033	238087	5.87243e+06	262041	5.86475e+06	272088	5.86153e+06
1	1	18	-141.868	29.344	10.4304	10.1449	0.277003	0.285603	0.237723	5.27063	20.0938	232010	5.86577e+06	261353	5.86605e+06	271783	5.86615e+06
1	1	19	-149.591	29.8805	11.0125	9.02771	0.286839	0.286943	0.286416	5.91948	20.7222	232075	5.86468e+06	261863	5.86702e+06	272842	5.86788e+06
1	1	20	-156.699	29.2445	11.0749	8.53028	0.307001	0.30237	0.323186	6.50606	23.866	235540	5.87997e+06	262235	5.86802e+06	272344	5.8635e+06
1	1	21	-138.596	29.5287	9.32043	11.0754	0.268921	0.298372	0.16428	6.48561	24.142	235461	5.88042e+06	262695	5.869e+06	271292	5.8654e+06
1	1	22	-134.943	26.706	10.3807	10.0755	0.289507	0.33508	0.138373	6.18729	22.8604	236548	5.87564e+06	262677	5.87012e+06	272834	5.86797e+06
1	1	23	-127.323	33.0698	11.4363	6.95118	0.220596	0.256075	0.0674555	6.22044	21.6691	229555	5.86961e+06	262583	5.87125e+06	274005	5.87182e+06
1	1	24	-127.507	26.854	10.8197	8.16394	0.272047	0.338629	0.0656623	6.55036	22.906	236400	5.87606e+06	262983	5.87225e+06	273693	5.87072e+06
1	1	25	-131.117	28.3634	10.8899	7.75054	0.264863	0.320568	0.0921053	6.91572	23.3659	235591	5.88022e+06	263103	5.87333e+06	273666	5.87068e+06
1	1	26	-129.337	26.3875	10.7994	8.64129	0.280829	0.349739	0.079503	6.72883	22.7478	236671	5.87523e+06	263047	5.87445e+06	273842	5.87413e+06
1	1	27	-122.988	25.3237	11.6208	8.06963	0.278263	0.36581	0.0262243	6.52873	21.9744	237676	5.87322e+06	262888	5.8756e+06	274457	5.8767e+06
1	1	28	-130.358	27.6031	11.2697	8.76579	0.270581	0.319315	0.0977467	6.07136	22.7442	235619	5.87825e+06	263175	5.87663e+06	274426	5.87597e+06
1	1	29	-117.357	25.051	10.0268	11.027	0.268413	0.349628	0.0281171	5.38607	21.841	237873	5.87284e+06	262397	5.87796e+06	272213	5.88e+06
1	1	30	-121.549	26.853	9.90976	10.9159	0.259346	0.30148	0.0219309	4.04743	21.7247	235582	5.88029e+06	262431	5.8798e+06	272339	5.87962e+06
1	1	31	-114.187	26.981	11.083	8.90082	0.242481	0.292782	0.0952217	3.49791	21.8335	235445	5.87949e+06	262391	5.88087e+06	273460	5.88143e+06
1	1	32	-123.411	27.1421	10.9843	8.54785	0.260514	0.286635	0.0619363	3.15535	21.3823	235219	5.88069e+06	262333	5.88193e+06	273305	5.88244e+06
1	1	33	-129.959	27.7426	10.4892	9.71805	0.268397	0.281686	0.171116	3.3345	21.7107	234571	5.88142e+06	262269	5.883e+06	272741	5.8836e+06
1	1	34	-132.914	28.2088	10.4538	9.31959	0.269965	0.277415	0.216052	3.42479	21.9466	234046	5.88236e+06	262203	5.88407e+06	272637	5.88471e+06
1	1	35	-132.963	26.7877	10.7777	9.34042	0.28439	0.29162	0.231305	3.21098	21.2489	235558	5.88006e+06	261865	5.88511e+06	272450	5.88714e+06
1	1	36	-123.757	26.8002	10.902	9.27121	0.264577	0.286291	0.0773065	2.78465	23.5104	237393	5.87368e+06	261147	5.88609e+06	270810	5.89114e+06
1	1	37	-144.985	36.3912	10.4333	9.03345	0.228269	0.19848	0.817679	1.7506	21.5727	226061	5.89198e+06	262149	5.88729e+06	272496	5.88595e+06
1	1	38	-118.335	27.3461	10.9199	9.39108	0.247934	0.25114	3.09742	-0.0307724	20.4178	234046	5.88185e+06	260649	5.88818e+06	271272	5.89071e+06
1	1	39	-124.564	29.2357	9.67152	11.1234	0.244117	0.240218	0.425937	0.613887	19.7449	231369	5.88679e+06	260393	5.8903e+06	269994	5.89147e+06
1	1	40	-126.679	36.1786	9.18755	11.841	0.20062	0.200065	0.211139	1.81242	19.8515	224393	5.88938e+06	260516	5.8914e+06	269689	5.89191e+06
1	1	41	-130.812	32.6873	9.74122	10.4543	0.229292	0.232559	0.198371	3.1229	20.4333	228239	5.89659e+06	260669	5.89249e+06	270333	5.89127e+06
1	1	42	-133.914	34.7532	10.528	9.68597	0.220775	0.217973	0.248299	3.2106	20.4343	225756	5.89344e+06	260509	5.89355e+06	271037	5.89358e+06
1	1	43	-129.665	30.804	11.5778	7.83589	0.241177	0.24992	0.16815	3.29334	20.0435	230065	5.88839e+06	260237	5.89459e+06	271578	5.89692e+06
1	1	44	-127.332	34.6857	10.9738	8.41428	0.210333	0.228099	0.0924648	4.54329	20.153	225759	5.89392e+06	260400	5.89569e+06	271360	5.89625e+06
1	1	45	-131.354	33.3519	10.7797	9.15991	0.225653	0.241683	0.132658	4.90366	20.5811	227376	5.9007e+06	260496	5.89678e+06	271201	5.89551e+06
1	1	46	-141.768	31.8664	12.2122	8.17881	0.254898	0.257113	0.243338	5.12548	20.4962	228518	5.89759e+06	260383	5.89784e+06	272595	5.89793e+06
1	1	47	-136.962	29.9587	11.2371	8.7584	0.261936	0.267971	0.22594	4.30131	21.9271	234046	5.88251e+06	259209	5.89877e+06	268648	5.90487e+06
1	1	48	-133.026	33.4373	9.96857	10.6668	0.227942	0.255747	0.11388	6.55361	20.4381	227830	5.88952e+06	259262	5.90093e+06	268633	5.90433e+06
1	1	49	-120.463	30.5696	9.48215	11.2358	0.22578	0.233384	0.0239048	1.10978	19.3387	228473	5.89858e+06	258855	5.90195e+06	268279	5.903e+06
1	1	50	-122.484	31.8579	9.34712	11.5751	0.220283	0.240656	0.0432746	3.28833	19.8326	227335	5.90129e+06	259143	5.90307e+06	268475	5.90359e+06
1	1	51	-127.17	30.4191	10.8933	8.71472	0.23953	0.252077	0.130675	3.14386	19.3882	228594	5.89819e+06	258443	5.90405e+06	269132	5.90615e+06
1	1	52	-142.34	31.7695	9.53119	11.6618	0.256705	0.269238	0.205358	6.23286	18.4739	227427	5.9059e+06	259189	5.90522e+06	268718	5.90502e+06
1	1	53	-159.829	35.7892	10.9366	8.92447	0.255872	0.241489	0.311829	7.31809	22.3574	228224	5.92341e+06	259693	5.90636e+06	269310	5.90116e+06
1	1	54	-162.767	33.1035	9.55802	11.6613	0.281716	0.264174	0.346225	7.07734	20.0738	227039	5.91342e+06	259595	5.90743e+06	268995	5.9057e+06
1	1	55	-163.961	35.1315	8.84379	12.2598	0.267402	0.245794	0.351825	7.15918	18.6728	224544	5.90819e+06	259674	5.90851e+06	268517	5.9086e+06
1	1	56	-141.942	32.6933	11.3461	7.61967	0.248756	0.269516	0.175024	7.18299	19.8139	227810	5.89947e+06	258928	5.9095e+06	269727	5.91298e+06
1	1	57	-130.484	32.8289	11.279	8.27507	0.227731	0.267531	0.0842593	7.12937	20.9571	228553	5.89783e+06	258813	5.91056e+06	269210	5.91493e+06
1	1	58	-131.671	34.2969	11.1202	7.71585	0.219966	0.231757	0.144416	4.63026	19.0451	224595	5.90805e+06	258705	5.91162e+06	269765	5.91278e+06
1	1	59	-138.57	31.6819	10.966	7.87612	0.250598	0.291552	0.131361	8.09968	19.2367	227115	5.91245e+06	258796	5.91271e+06	269761	5.9128e+06
1	1	60	-145.369	31.1496	10.3502	9.91269	0.267386	0.29936	0.177641	8.18254	19.0968	227907	5.91732e+06	258961	5.91488e+06	269280	5.91408e+06
1	1	61	-145.274	31.7572	10.7782	8.82561	0.262098	0.287788	0.184079	7.86661	19.4235	226939	5.91471e+06	258673	5.91592e+06	269443	5.91634e+06
1	1	62	-145.341	34.5633	11.2726	8.25057	0.240931	0.257847	0.183822	7.89844	19.6032	224672	5.91004e+06	258531	5.91698e+06	269573	5.91925e+06
1	1	63	-149.065	30.8039	10.5134	9.06132	0.27726	0.302009	0.207167	8.0383	18.6658	227830	5.91742e+06	258627	5.91807e+06	269138	5.91829e+06
1	1	64	-151.328	31.3947	10.4697	9.28821	0.276173	0.307381	0.198842	9.02692	18.9961	227418	5.92172e+06	258709	5.91916e+06	269143	5.91831e+06
1	1	65	-160.829	31.2904	13.1662	6.74118	0.294492	0.308338	0.260154	8.9921	18.8548	227283	5.92072e+06	258568	5.92129e+06	271732	5.92154e+06
1	1	66	-163.136	31.1916	11.8388	7.768	0.299661	0.301689	0.294161	8.40178	19.116	227471	5.9219e+06	258659	5.92238e+06	270496	5.92257e+06
1	1	67	-165.064	30.6718	11.2868	9.24368	0.308342	0.306652	0.312934	8.25081	19.3109	227867	5.92297e+06	258535	5.92344e+06	269820	5.92362e+06
1	1	68	-158.571	32.7821	10.4866	9.27551	0.277145	0.282991	0.260408	8.48647	19.1807	226972	5.9137e+06	257943	5.92445e+06	267850	5.92788e+06
1	1	69	-154.671	36.3659	12.5802	8.35496	0.243688	0.243977	0.242691	8.18518	19.3532	224668	5.91001e+06	257579	5.92548e+06	268964	5.93083e+06
2	1	70	-141.772	35.7265	14.4568	4.06017	0.227363	0.244644	0.163648	7.62261	20.9757	226731	5.9069e+06	256643	5.92644e+06	268747	5.93434e+06
2	1	71	-148.707	29.812	10.4771	9.73922	0.285798	0.314026	0.207738	7.91752	18.3924	227803	5.92289e+06	257242	5.92759e+06	267588	5.92924e+06
2	1	72	-142.472	26.9855	11.4006	7.81568	0.302495	0.350969	0.174095	7.39569	16.55	230265	5.93255e+06	256964	5.92863e+06	268244	5.92697e+06
2	1	73	-133.138	31.2038	13.1326	6.23093	0.244464	0.290559	0.0998231	7.54103	18.4171	227296	5.91855e+06	256460	5.92964e+06	268734	5.93431e+06
2	1	74	-141.366	29.1436	12.5125	6.93515	0.277921	0.313255	0.170138	7.19525	17.5312	228214	5.9234e+06	256423	5.93071e+06	268535	5.93386e+06
2	1	75	-155.388	25.269	11.3858	8.03903	0.352328	0.434035	0.215051	9.42846	16.0213	231826	5.93569e+06	256799	5.93184e+06	268052	5.9301e+06
2	1	76	-165.688	25.4384	12.3496	7.3469	0.37318	0.50973	0.219051	11.9503	20.2934	236398	5.94664e+06	257901	5.93305e+06	268340	5.92645e+06
2	1	77	-154.818	24.8283	11.0927	8.48751	0.357267	0.48643	0.186547	10.694	17.1448	234546	5.94311e+06	257681	5.9341e+06	268017	5.93007e+06
2	1	78	-144.993	34.0542	14.1824	3.28346	0.243948	0.270822	0.165225	8.66692	20.9338	227996	5.91659e+06	256616	5.93504e+06	268536	5.94273e+06
2	1	79	-145.862	37.5382	16.4479	2.73387	0.222633	0.239871	0.16696	8.87511	21.5156	227117	5.91216e+06	256070	5.93605e+06	268757	5.94652e+06
2	1	80	-157.27	24.5713	12.6215	5.78851	0.36672	0.435867	0.242734	8.79734	15.6078	232007	5.93656e+06	256573	5.93709e+06	269191	5.93736e+06
2	1	81	-158.007	22.7283	13.3829	4.28006	0.398314	0.481802	0.257458	8.45826	14.578	233557	5.94055e+06	256250	5.93929e+06	269612	5.93855e+06
2	1	82	-162.153	23.6594	12.9833	5.63894	0.39268	0.456742	0.28063	8.60634	14.8437	232775	5.93911e+06	256402	5.94035e+06	269367	5.94103e+06
2	1	83	-160.341	22.4279	13.0831	5.92384	0.409612	0.486208	0.27891	8.28717	14.6487	233827	5.9415e+06	256255	5.94145e+06	269338	5.94142e+06
2	1	84	-174.294	20.793	14.3458	6.20454	0.480262	0.591042	0.339584	9.16057	15.6289	236518	5.9468e+06	256850	5.94244e+06	270878	5.93944e+06
2	1	85	-171.049	20.3975	12.8951	7.50466	0.480459	0.586795	0.336933	8.68091	15.1381	236422	5.94667e+06	256581	5.94356e+06	269325	5.9416e+06
2	1	86	-165.925	23.0946	12.3843	7.4289	0.411641	0.489327	0.290946	9.04398	15.268	233696	5.94094e+06	256489	5.94466e+06	268712	5.94665e+06
2	1	87	-145.823	22.9662	13.276	6.89364	0.363792	0.475663	0.173818	8.51197	15.1322	233662	5.94084e+06	256088	5.94579e+06	269052	5.94865e+06
2	1	88	-144.298	20.3839	12.1279	8.18	0.405592	0.578554	0.163779	8.50033	14.6983	236025	5.94586e+06	256386	5.94683e+06	268500	5.9474e+06
2	1	89	-147.341	19.0179	12.3185	7.38479	0.443891	0.600637	0.206904	7.57127	13.718	237583	5.95067e+06	256399	5.94791e+06	268586	5.94612e+06
2	1	90	-152.582	20.1689	11.8025	7.85204	0.433446	0.558804	0.237344	7.86529	14.0216	237147	5.95368e+06	256974	5.94998e+06	268576	5.94782e+06
2	1	91	-142.163	18.638	11.846	7.36098	0.437018	0.598202	0.177725	7.14485	13.2326	237624	5.95026e+06	256239	5.95117e+06	268071	5.95175e+06
2	1	92	-136.528	21.0437	12.8867	5.78634	0.371722	0.512264	0.124242	7.62224	15.1718	236135	5.94622e+06	256301	5.95224e+06	268651	5.95592e+06
2	1	93	-125.746	18.8111	13.0046	4.7606	0.382997	0.561007	0.050217	6.55588	13.0315	237393	5.94919e+06	255726	5.9534e+06	268400	5.95631e+06
2	1	94	-121.877	18.6504	12.9277	4.68734	0.374412	0.60674	0.0146955	7.31899	13.037	237577	5.95069e+06	255841	5.95446e+06	268501	5.95708e+06
2	1	95	-119.81	19.7839	12.4569	6.98682	0.346976	0.462654	0.00221269	4.92321	9.89679	236323	5.95782e+06	255974	5.95552e+06	268347	5.95408e+06
2	1	96	-110.935	18.4993	13.1118	4.93186	0.343582	0.497972	0.110677	4.69269	9.44214	237242	5.95549e+06	255705	5.95664e+06	268792	5.95746e+06
2	1	97	-118.812	18.6308	12.7899	5.80114	0.365381	0.503764	0.0136596	4.98291	9.67542	237216	5.95585e+06	255754	5.95771e+06	268479	5.95899e+06
2	1	98	-132.663	18.4627	13.1392	5.61333	0.41169	0.60413	0.102445	7.08228	10.4536	238869	5.96452e+06	256390	5.9587e+06	268858	5.95456e+06
2	1	99	-143.538	22.1513	13.3108	5.12648	0.371264	0.441814	0.204655	6.58964	11.9623	238878	5.97226e+06	257108	5.95968e+06	268062	5.95212e+06
2	1	100	-150.136	21.653	12.952	6.23105	0.397265	0.43489	0.295472	5.84362	11.7756	238395	5.97096e+06	257466	5.9607e+06	268874	5.95457e+06
2	1	101	-152.708	21.1833	11.4085	8.61729	0.41303	0.46277	0.29622	6.32638	11.0186	237206	5.96725e+06	257666	5.96175e+06	268684	5.9588e+06
2	1	102	-144.297	19.2008	11.3679	8.97262	0.430579	0.558561	0.201992	6.89186	10.848	238285	5.96303e+06	257485	5.96286e+06	268852	5.96276e+06
2	1	103	-152.486	21.0154	10.1584	10.2565	0.415727	0.402583	0.472739	3.93724	11.267	237661	5.96854e+06	258145	5.96384e+06	268046	5.96157e+06
2	1	104	-149.168	20.6427	10.4269	9.907	0.414022	0.428187	0.364425	4.58581	10.4963	238577	5.97142e+06	258169	5.96492e+06	268064	5.96163e+06
2	1	105	-148.419	20.4904	10.359	10.1605	0.415006	0.429101	0.364455	4.46773	11.1747	237576	5.96508e+06	258045	5.96602e+06	268394	5.96649e+06
2	1	106	-142.009	20.4261	10.02	10.3153	0.398333	0.423833	0.299941	4.20423	10.3506	238224	5.96982e+06	258460	5.96704e+06	268386	5.96567e+06
2	1	107	-143.192	20.0885	10.145	10.4722	0.408401	0.424909	0.340048	3.90766	10.2877	238624	5.97158e+06	258413	5.96812e+06	268407	5.96638e+06
2	1	108	-142.774	21.0719	10.4815	10.0589	0.388207	0.397899	0.344051	3.79265	10.1151	237282	5.96759e+06	258290	5.96922e+06	268741	5.97003e+06
2	1	109	-138.061	20.2181	10.4876	10.1322	0.391242	0.460747	0.195397	5.29595	10.0556	238126	5.96951e+06	258329	5.97029e+06	268809	5.9707e+06
2	1	110	-137.341	19.6829	10.6718	9.94027	0.399785	0.479149	0.186273	5.33387	9.55352	238635	5.97162e+06	258317	5.97137e+06	268988	5.97124e+06
2	1	111	-134.597	19.3897	10.8516	9.36126	0.397723	0.435755	0.231569	3.61162	9.33091	238933	5.9724e+06	258323	5.97245e+06	269175	5.97248e+06
2	1	112	-137.19	19.1239	11.7314	8.94479	0.411018	0.429937	0.314431	3.13234	9.10204	239111	5.97265e+06	258214	5.97355e+06	269932	5.9741e+06
2	1	113	-139.96	18.2266	10.5151	10.1119	0.439958	0.494271	0.264933	4.31657	8.17318	243763	5.98647e+06	260674	5.97967e+06	270430	5.97575e+06
2	1	114	-132.804	23.8818	10.5029	10.1602	0.318612	0.327766	0.252514	2.90521	15.8133	241526	5.99732e+06	263470	5.9879e+06	273121	5.98375e+06
2	1	115	-135.704	23.6313	10.7577	10.1268	0.32902	0.336806	0.279625	3.21776	15.3428	241425	5.9965e+06	263808	5.98893e+06	273998	5.98548e+06
2	1	116	-135.032	23.7727	10.3965	10.2881	0.325443	0.343888	0.227874	3.77954	17.7158	241708	5.99771e+06	264180	5.98995e+06	274007	5.98656e+06
2	1	117	-133.093	23.1456	11.1571	8.95667	0.329462	0.353186	0.203921	3.67876	15.3538	241497	5.99545e+06	264217	5.99103e+06	275169	5.9889e+06
2	1	118	-135.066	23.0717	10.1085	10.3995	0.335417	0.358436	0.221906	3.88998	15.6603	241592	5.99511e+06	264462	5.99207e+06	274482	5.99074e+06
2	1	119	-124.283	21.384	23.2409	9.20745	0.332998	0.377481	0.0774176	3.17013	12.8253	242874	5.98837e+06	263692	5.99326e+06	286317	5.99857e+06
2	1	120	-121.62	21.2987	21.3529	6.28792	0.327167	0.331021	0.175679	0.528316	13.4818	243681	5.9868e+06	263595	5.99435e+06	283559	6.00193e+06
2	1	121	-134.629	23.6372	10.0355	10.6611	0.326333	0.30838	0.624609	1.34186	16.7886	242314	6.00359e+06	264473	5.99537e+06	273881	5.99187e+06
2	1	122	-118.858	21.8631	11.8775	9.76453	0.311483	0.314698	4.24302	0.0153991	16.1542	242252	5.99965e+06	263915	5.9967e+06	275683	5.99509e+06
2	1	123	-110.3	22.1119	19.959	5.30677	0.285805	0.305549	1.42476	-0.38998	16.3256	242301	5.99349e+06	263988	5.99781e+06	283563	6.0017e+06
2	1	124	-104.291	21.9798	22.6263	6.47195	0.271857	0.301676	1.10977	-0.810941	15.9636	241936	5.99898e+06	263916	5.99896e+06	286542	5.99895e+06
2	1	125	-94.7529	21.5106	22.6621	5.63366	0.252383	0.306795	1.60699	-0.899926	15.4994	242552	6.00068e+06	264054	6.00005e+06	286706	5.99938e+06
2	1	126	-95.2325	21.8662	21.6253	5.98774	0.249536	0.300713	1.42223	-0.997579	16.3986	242854	6.00522e+06	264325	6.00108e+06	285559	5.99699e+06
3	1	127	-133.79	35.0113	16.2636	7.04734	0.218945	0.28611	0.0719541	10.9806	28.2081	249998	6.03224e+06	266597	6.00142e+06	274307	5.9871e+06
3	1	128	-149.783	45.7745	17.5456	6.26034	0.187482	0.216516	0.121717	14.0195	31.4733	249787	6.04461e+06	267283	6.00231e+06	273989	5.98609e+06
3	1	129	-151.192	27.2302	13.9002	7.25809	0.318125	0.36459	0.213465	8.37225	20.2593	244237	6.01711e+06	267701	6.00329e+06	279679	5.99624e+06
3	1	130	-147.263	25.2616	19.2898	7.59272	0.334002	0.397348	0.196273	7.95841	18.6309	244206	6.0128e+06	268000	6.00432e+06	286169	5.99784e+06
3	1	131	-167.669	28.0449	18.5552	7.66368	0.342543	0.352226	0.320372	8.52506	20.4816	243909	6.0183e+06	268710	6.0052e+06	285118	5.99654e+06
3	1	132	-154.725	26.4652	19.1861	7.82775	0.334968	0.37404	0.246123	8.08372	19.7582	243878	6.01542e+06	268734	6.00633e+06	286753	5.99974e+06
3	1	133	-143.08	25.6516	18.7497	7.12721	0.319582	0.392973	0.162141	8.1558	19.7814	242976	6.00625e+06	268596	6.00751e+06	287323	6.00843e+06
3	1	134	-151.804	25.3766	22.9461	6.91752	0.342742	0.391549	0.233105	7.81713	19.4989	243323	6.00818e+06	268696	6.0086e+06	291639	6.00898e+06
3	1	135	-158.708	30.5713	19.7476	7.6215	0.297442	0.321461	0.241502	9.1833	19.5183	243434	6.02501e+06	269710	6.00938e+06	286683	5.99929e+06
3	1	136	-151.562	28.6301	19.5535	7.38059	0.303308	0.44428	0.137466	13.1548	23.7996	250583	6.03091e+06	270421	6.01026e+06	283970	5.99616e+06
3	1	137	-148.264	30.6847	15.1374	8.16312	0.276843	0.365196	0.136567	11.8581	20.1338	244469	6.02696e+06	270826	6.01125e+06	283828	6.0035e+06
3	1	138	-147.929	26.9922	21.1472	7.44096	0.314003	0.384662	0.175493	9.11833	20.3301	244136	6.01677e+06	270772	6.0124e+06	291640	6.00898e+06
3	1	139	-148.145	27.1232	19.7501	7.07724	0.312942	0.38643	0.172816	9.33115	20.5179	244301	6.01732e+06	271140	6.01341e+06	290683	6.01056e+06
3	1	140	-146.032	29.8732	21.166	7.29248	0.280082	0.390073	0.121785	12.2473	18.9705	243103	6.02387e+06	271447	6.01443e+06	291529	6.00774e+06
3	1	141	-151.931	29.9862	16.3549	7.81756	0.290297	0.389489	0.14833	12.3339	21.9349	246352	6.03042e+06	272238	6.01528e+06	286357	6.00703e+06
3	1	142	-150.311	29.08	16.6339	7.38721	0.296152	0.430443	0.132497	13.1073	21.5922	247183	6.03061e+06	272513	6.01632e+06	287002	6.00815e+06
3	1	143	-145.602	28.2273	19.6855	5.92176	0.295542	0.434006	0.118437	12.3856	19.614	244347	6.02015e+06	272447	6.01748e+06	292044	6.01561e+06
3	1	144	-150.36	29.2148	18.1471	6.88901	0.294882	0.414167	0.137899	12.6143	21.4983	245435	6.0275e+06	273182	6.01835e+06	290417	6.01267e+06
3	1	145	-151.156	27.9314	21.4095	7.03319	0.310065	0.53933	0.11757	15.1835	22.0411	250460	6.03484e+06	273673	6.01931e+06	291467	6.0074e+06
3	1	146	-155.116	27.8941	19.2431	7.18503	0.318613	0.520035	0.137122	14.6732	22.0832	250363	6.03454e+06	274301	6.02022e+06	290815	6.01034e+06
3	1	147	-152.728	27.8147	17.853	7.10905	0.314603	0.479258	0.139223	13.4689	21.9831	250423	6.03473e+06	274727	6.0212e+06	290327	6.01252e+06
3	1	148	-153.267	26.8582	18.1405	6.88964	0.326956	0.604008	0.123166	15.4755	21.7885	249972	6.0318e+06	275063	6.02222e+06	292010	6.01575e+06
3	1	149	-151.211	26.0433	14.6387	7.45045	0.332664	0.627698	0.118505	15.0903	21.7234	250513	6.03103e+06	275366	6.02324e+06	289336	6.01887e+06
3	1	150	-151.698	26.7517	13.2429	7.43006	0.324899	0.501747	0.139183	13.0489	21.7043	249968	6.03173e+06	275660	6.02427e+06	288378	6.02058e+06
3	1	151	-154.582	30.8851	12.4478	7.93789	0.286767	0.449736	0.127032	15.5976	21.7122	248794	6.03956e+06	277085	6.02717e+06	288487	6.02217e+06
3	1	152	-152.058	28.8016	12.6963	7.7453	0.302489	0.503021	0.12137	15.1335	21.2974	249931	6.0379e+06	277084	6.0283e+06	289054	6.02407e+06
3	1	153	-150.97	27.6327	13.6323	8.31447	0.31303	0.474367	0.135052	13.139	21.5689	250530	6.03511e+06	277540	6.02927e+06	290865	6.02639e+06
3	1	154	-154.833	27.6125	12.6288	8.13739	0.321275	0.527797	0.136828	14.5861	22.4532	254382	6.04417e+06	278187	6.03018e+06	289075	6.02378e+06
3	1	155	-154.108	27.5331	11.6205	9.38356	0.320692	0.654407	0.114772	17.0271	22.4015	254563	6.0446e+06	278597	6.03116e+06	288741	6.0255e+06
3	1	156	-150.67	27.6075	11.4772	8.82218	0.312693	0.661918	0.102043	17.2207	22.5634	255567	6.04615e+06	279300	6.03205e+06	289167	6.02619e+06
3	1	157	-157.191	27.6286	12.8234	8.46484	0.325977	0.635229	0.126797	16.8054	22.5759	256263	6.04758e+06	279749	6.03302e+06	290650	6.02627e+06
3	1	158	-160.11	27.5261	13.7266	7.20251	0.333268	0.640012	0.136927	16.7837	22.6062	256101	6.04702e+06	280327	6.03395e+06	292408	6.02744e+06
3	1	159	-157.78	27.442	13.3797	7.08768	0.329422	0.632954	0.130556	16.5799	22.4777	256165	6.04722e+06	280712	6.03495e+06	292680	6.02897e+06
3	1	160	-150.522	31.5638	13.3382	6.92905	0.273232	0.41099	0.117884	14.835	22.9461	249069	6.03886e+06	280516	6.03615e+06	293805	6.03501e+06
3	1	161	-155.297	29.0659	12.7249	8.44286	0.306125	0.452823	0.145678	13.8826	21.8019	256155	6.05214e+06	281532	6.03797e+06	292642	6.03177e+06
3	1	162	-162.959	29.2977	14.8895	6.65122	0.318686	0.584643	0.140345	17.538	24.4823	262704	6.06011e+06	282482	6.03849e+06	292533	6.02751e+06
3	1	163	-156.596	27.7644	11.7045	7.73012	0.323154	0.597011	0.129047	16.2483	21.7378	257787	6.0525e+06	282442	6.03973e+06	292836	6.03435e+06
3	1	164	-159.087	28.7816	12.0978	6.95894	0.316692	0.483901	0.153669	14.5735	22.0515	255898	6.04973e+06	283174	6.04055e+06	294639	6.03669e+06
3	1	165	-148.285	27.1762	12.8935	6.23007	0.312628	0.651116	0.0975275	16.6171	21.4865	258407	6.05282e+06	283640	6.04272e+06	295611	6.03793e+06
3	1	166	-156.097	29.1769	13.1827	5.28812	0.30653	0.560884	0.122241	16.9189	21.7731	256095	6.05189e+06	284095	6.04369e+06	296746	6.03998e+06
3	1	167	-159.544	27.2679	12.3564	6.77514	0.335233	0.775611	0.123111	18.4038	22.9886	263354	6.06107e+06	284960	6.04444e+06	294751	6.0369e+06
3	1	168	-165.665	27.0319	12.6867	6.03348	0.351134	0.765219	0.144975	18.0474	22.9682	263592	6.06144e+06	285372	6.04543e+06	295595	6.03792e+06
3	1	169	-160.102	28.0835	12.7047	5.35262	0.326636	0.539261	0.149842	15.3341	22.7123	259338	6.05614e+06	285704	6.04646e+06	297631	6.04209e+06
3	1	170	-161.991	27.5027	12.5243	5.47247	0.337468	0.651688	0.141917	16.9529	22.1849	261334	6.05896e+06	286274	6.04737e+06	297632	6.04209e+06
3	1	171	-161.554	26.646	12.5079	5.67163	0.34738	0.787026	0.132932	17.9105	22.4867	263155	6.06082e+06	286703	6.04835e+06	297757	6.0425e+06
3	1	172	-162.644	26.8127	11.5253	6.91689	0.347547	0.752299	0.138243	17.6739	22.1964	262458	6.05987e+06	287117	6.04934e+06	297716	6.04482e+06
3	1	173	-163.399	27.5063	11.5433	7.41843	0.340356	0.491658	0.183884	13.5224	22.6501	264001	6.06403e+06	287778	6.0502e+06	297757	6.0444e+06
3	1	174	-154.725	27.3747	10.6074	8.5232	0.323839	0.69984	0.113363	17.5508	21.9811	261426	6.05905e+06	287724	6.05144e+06	297914	6.0485e+06
3	1	175	-151.957	29.373	11.1309	7.3049	0.296408	0.478135	0.122117	14.9935	23.7484	258574	6.05413e+06	287905	6.05256e+06	299020	6.05196e+06
3	1	176	-162.36	30.9542	10.812	9.31976	0.300523	0.407725	0.172234	14.0914	22.9239	264080	6.07154e+06	289003	6.05318e+06	297709	6.04677e+06
3	1	177	-164.495	32.3889	11.876	6.8571	0.290988	0.397024	0.169149	15.0716	25.9451	267479	6.0778e+06	289555	6.0541e+06	297650	6.04541e+06
3	1	178	-164.561	26.9968	9.83687	10.9742	0.349246	0.517877	0.186078	13.7209	22.0851	264316	6.06432e+06	289732	6.05521e+06	298993	6.0519e+06
3	1	179	-165.018	26.4391	9.998	10.2887	0.357603	0.551411	0.184625	13.9706	22.1651	265226	6.06467e+06	290254	6.05615e+06	299718	6.05292e+06
3	1	180	-163.665	31.1145	9.58599	11.2379	0.301379	0.409578	0.174612	14.328	24.2715	265292	6.07459e+06	290948	6.05699e+06	298852	6.05156e+06
3	1	181	-161.521	28.9473	10.4615	9.46343	0.319697	0.45616	0.171455	13.8751	21.9045	263934	6.06839e+06	291015	6.05816e+06	300802	6.05447e+06
3	1	182	-162.746	31.2122	9.73722	11.0384	0.298748	0.383758	0.184199	13.2963	24.1574	265474	6.07515e+06	292068	6.05881e+06	300364	6.05371e+06
3	1	183	-155.219	30.2306	10.2934	10.1886	0.294183	0.392366	0.158794	12.7077	23.5682	264565	6.07296e+06	291925	6.0601e+06	301241	6.05572e+06
3	1	184	-155.371	27.4302	18.0517	4.88101	0.324533	0.529895	0.140197	14.4554	22.7941	265171	6.06466e+06	292366	6.06107e+06	310263	6.05872e+06
4	2	185	-167.388	32.3197	10.3046	9.6607	0.296739	0.361298	0.204296	13.29	24.5332	271578	6.08531e+06	293578	6.06163e+06	300593	6.05409e+06
4	2	186	-164.393	33.479	10.3539	9.9529	0.28134	0.341301	0.190752	13.3343	24.2536	271739	6.08754e+06	294060	6.06259e+06	300963	6.05487e+06
4	2	187	-153.255	29.0132	21.0988	4.29139	0.302647	0.471319	0.13208	14.4258	23.3309	264856	6.06635e+06	293771	6.06396e+06	314797	6.06222e+06
4	2	188	-164.639	30.5215	16.1398	5.56677	0.309062	0.379201	0.206423	12.3903	24.0992	267538	6.07785e+06	294994	6.06451e+06	309512	6.05746e+06
4	2	189	-169.662	36.1855	11.022	9.28928	0.26864	0.334367	0.18213	15.623	25.6166	274494	6.09467e+06	295694	6.06535e+06	302152	6.05642e+06
4	2	190	-159.888	31.2888	18.4875	4.56886	0.292783	0.367339	0.181784	12.572	24.2831	265858	6.07612e+06	295656	6.06658e+06	313263	6.06094e+06
4	2	191	-164.075	30.4311	17.5387	4.72767	0.308918	0.381249	0.203699	12.3972	23.4519	268718	6.07959e+06	296559	6.06731e+06	312606	6.06023e+06
4	2	192	-157.402	29.167	17.8758	4.62096	0.309197	0.397498	0.180529	11.8703	22.7647	270896	6.08215e+06	296658	6.06847e+06	312447	6.06009e+06
4	2	193	-159.608	30.4831	19.692	4.56985	0.299996	0.37681	0.185456	12.2368	23.4633	268023	6.07825e+06	297192	6.06939e+06	316035	6.06367e+06
4	2	194	-165.463	34.2543	17.1105	4.67748	0.276761	0.329985	0.194117	13.4187	23.0312	271540	6.09186e+06	298038	6.07015e+06	311273	6.05931e+06
4	2	195	-171.11	32.1291	21.2983	3.98392	0.305138	0.34052	0.245295	11.9381	24.6752	265524	6.07528e+06	297450	6.07168e+06	318614	6.06929e+06
4	2	196	-154.981	31.8018	20.4525	4.28499	0.27922	0.352961	0.162649	12.3226	24.0136	266979	6.07735e+06	298391	6.07239e+06	318593	6.06919e+06
4	2	197	-162.648	33.9011	18.6117	4.56598	0.274888	0.362475	0.163634	14.9331	23.6921	276263	6.09817e+06	299989	6.07395e+06	313015	6.06066e+06
4	2	198	-156.793	31.2134	18.8785	4.5711	0.287809	0.412837	0.14479	14.5594	23.7878	269599	6.08105e+06	300229	6.07504e+06	318754	6.0714e+06
4	2	199	-155.445	33.4712	19.2432	4.63831	0.266087	0.362045	0.140244	14.4808	23.3318	271808	6.09214e+06	301031	6.07582e+06	317832	6.06644e+06
4	2	200	-148.99	28.9911	19.9975	4.17684	0.294449	0.425303	0.129508	12.8253	22.3781	272254	6.08297e+06	300671	6.07723e+06	320272	6.07327e+06
4	2	201	-151.417	32.4404	22.2344	3.8003	0.267428	0.361479	0.134128	13.4202	24.5723	268711	6.07949e+06	301126	6.0782e+06	323342	6.07731e+06
4	2	202	-165.468	30.619	19.857	4.48761	0.309628	0.399095	0.194533	13.3916	21.738	276588	6.09626e+06	301881	6.079e+06	318285	6.06781e+06
4	2	203	-151.666	31.2249	18.7725	4.24904	0.278295	0.38091	0.137709	13.175	22.097	274441	6.09455e+06	302115	6.08009e+06	318753	6.07139e+06
4	2	204	-147.067	31.4604	19.0171	4.26883	0.267838	0.377469	0.11708	13.2459	22.3877	274043	6.09381e+06	302757	6.08096e+06	320113	6.07318e+06
4	2	205	-160.009	25.4399	21.7526	4.46553	0.360368	1.04254	0.121638	18.8456	22.4866	292324	6.10372e+06	304443	6.08135e+06	314805	6.06222e+06
4	2	206	-159.321	24.8943	22.1766	4.53178	0.366684	1.12954	0.119786	18.808	22.8395	295340	6.10489e+06	305364	6.0821e+06	314294	6.0618e+06
4	2	207	-159.023	32.859	17.3808	4.54676	0.277285	0.386336	0.148438	15.0626	23.2252	278910	6.10215e+06	305702	6.08312e+06	319874	6.07306e+06
4	2	208	-163.367	31.5539	17.86	4.44649	0.296641	0.453337	0.151622	16.3878	22.114	281163	6.10308e+06	306955	6.0849e+06	321553	6.07461e+06
4	2	209	-152.807	20.6663	16.4724	4.65492	0.423639	1.14104	0.128383	14.6415	18.3212	293780	6.10413e+06	310869	6.09251e+06	324490	6.08324e+06
4	2	210	-150.045	30.8231	17.2502	4.72776	0.278911	0.435553	0.114477	15.0377	19.6991	282558	6.10447e+06	311347	6.09346e+06	327459	6.0873e+06
4	2	211	-148.57	31.1163	18.8956	4.5339	0.273567	0.420063	0.110989	14.7489	19.5777	281777	6.10376e+06	311505	6.09457e+06	329557	6.08898e+06
4	2	212	-147.926	19.7865	17.105	4.70895	0.428342	0.99304	0.124385	12.8635	17.5398	294877	6.10464e+06	312351	6.09535e+06	327457	6.08733e+06
4	2	213	-147.168	18.8916	17.1149	4.60488	0.446332	0.896874	0.13866	11.2262	17.0473	296163	6.10579e+06	312569	6.09643e+06	327432	6.08794e+06
4	2	214	-148.359	21.2471	21.2952	4.48423	0.400063	0.805445	0.127824	12.7114	17.8019	292846	6.10405e+06	313024	6.09739e+06	333248	6.09072e+06
4	2	215	-138.403	21.9234	22.9475	4.20384	0.361706	0.849951	0.0762161	13.8347	18.4851	291499	6.10287e+06	312998	6.09858e+06	335502	6.09409e+06
4	2	216	-132.984	36.5438	22.6593	3.91871	0.208501	0.320886	0.0492112	15.1175	20.9176	276437	6.09896e+06	312972	6.09977e+06	335626	6.10026e+06
4	2	217	-141.284	20.2028	20.3428	4.40207	0.400678	0.735834	0.112295	10.8595	16.9434	297168	6.11132e+06	314165	6.1004e+06	331280	6.0894e+06
4	2	218	-148.537	18.8711	18.6005	4.14664	0.450975	4.09846	0.0950819	17.1964	18.1398	301674	6.11506e+06	314646	6.10135e+06	327433	6.08784e+06
4	2	219	-170.9	23.6332	19.2344	4.40906	0.414318	0.905761	0.181782	16.043	18.7951	303611	6.12169e+06	316312	6.10177e+06	326650	6.08554e+06
4	2	220	-169.772	23.8499	19.3619	4.21005	0.407844	0.712548	0.200806	14.2012	18.244	304215	6.12295e+06	316823	6.10271e+06	327058	6.08627e+06
4	2	221	-149.237	20.9699	18.9536	4.49072	0.40775	0.976954	0.120229	13.9329	17.6272	297035	6.11109e+06	317372	6.10598e+06	335753	6.10136e+06
4	2	222	-143.988	21.0428	23.3474	4.32092	0.392047	1.07516	0.0938238	14.6487	17.6619	297014	6.11106e+06	317666	6.10702e+06	340579	6.10254e+06
4	2	223	-147.374	17.8353	21.6085	4.64991	0.473427	2.00255	0.108892	14.4033	16.462	302970	6.11671e+06	318439	6.10784e+06	337182	6.09709e+06
4	2	224	-152.365	19.6835	21.3575	4.63281	0.443503	0.706494	0.186327	9.95214	15.0374	303092	6.12064e+06	319467	6.10972e+06	337235	6.09787e+06
4	2	225	-145.595	17.5646	22.8064	4.37105	0.474918	1.42074	0.115231	12.7263	16.0162	303085	6.11695e+06	319556	6.11085e+06	340941	6.10293e+06
4	2	226	-148.325	17.9076	23.5598	4.15646	0.474561	1.67462	0.117577	13.803	16.7516	302550	6.11598e+06	319971	6.11184e+06	342891	6.10638e+06
4	2	227	-150.006	17.95	23.3135	4.17351	0.4788	0.828878	0.17805	9.65569	14.5383	303444	6.11905e+06	320294	6.11286e+06	342179	6.10483e+06
4	2	228	-165.136	19.7218	22.3738	4.29683	0.479741	1.40382	0.17444	14.8251	16.9426	304052	6.12367e+06	321059	6.11369e+06	340353	6.10236e+06
4	2	229	-162.491	27.2953	22.8462	4.10319	0.341083	0.558896	0.162372	14.9937	16.6588	297686	6.12831e+06	321362	6.11472e+06	341179	6.10336e+06
4	2	230	-154.322	17.8386	21.4821	4.04928	0.495654	0.956812	0.184588	10.6534	15.0133	303626	6.11809e+06	321332	6.11591e+06	342654	6.11329e+06
4	2	231	-155.073	25.3481	20.6529	4.03037	0.350515	0.609325	0.142876	14.0647	15.6807	298224	6.12641e+06	322739	6.11997e+06	342714	6.11472e+06
4	2	232	-145.528	28.1357	22.4561	4.04774	0.296351	0.345828	0.177185	8.25471	14.1121	295701	6.1298e+06	323084	6.12333e+06	344939	6.11817e+06
4	2	233	-161.698	27.2971	23.3654	4.11077	0.339397	0.372124	0.270847	8.82096	13.7405	297351	6.13089e+06	323808	6.12417e+06	346455	6.11842e+06
4	2	234	-156.559	30.1325	21.8367	3.97823	0.297688	0.32727	0.229575	9.12409	13.2009	295504	6.13567e+06	323844	6.12544e+06	344383	6.11802e+06
4	2	235	-161.379	28.2809	23.7389	3.95091	0.326943	0.36208	0.255139	9.29228	13.2373	296708	6.13259e+06	324317	6.12647e+06	347492	6.12132e+06
4	2	236	-155.068	28.8458	24.359	3.81052	0.308005	0.352541	0.215043	9.3434	13.6647	296278	6.13453e+06	324510	6.12861e+06	348350	6.12361e+06
4	2	237	-186.054	33.092	23.2618	3.90791	0.322132	0.315251	0.335433	11.2826	16.5461	295732	6.1437e+06	326061	6.13046e+06	347381	6.12116e+06
4	2	238	-182.419	32.7609	23.7956	3.78342	0.319031	0.324283	0.309398	11.5589	16.2888	296682	6.14621e+06	325989	6.13157e+06	347275	6.12093e+06
4	2	239	-181.259	28.2638	27.0981	3.4155	0.367439	0.399358	0.317697	11.0477	14.4553	297769	6.13226e+06	326030	6.13265e+06	353126	6.13303e+06
4	2	240	-180.591	29.6502	27.1101	3.33244	0.348968	0.362889	0.324329	10.7039	14.7308	296394	6.1344e+06	326037	6.13374e+06	353140	6.13315e+06
4	2	241	-143.746	28.1011	31.0293	1.56393	0.293083	0.369298	0.143462	9.48366	13.3887	297920	6.12765e+06	324274	6.1374e+06	353375	6.14817e+06
5	2	242	-249.649	39.6874	24.0095	3.79519	0.360408	0.356126	0.364464	20.3813	31.8864	306202	6.16857e+06	330465	6.13717e+06	345144	6.11817e+06
5	2	243	-251.376	31.6838	22.7339	4.54905	0.45457	0.423854	0.486793	15.4627	20.969	300915	6.1488e+06	331115	6.13921e+06	352784	6.13233e+06
5	2	244	-242.905	31.3834	22.3692	4.45486	0.443456	0.430762	0.456593	15.4225	20.6785	301004	6.14888e+06	331187	6.14029e+06	352701	6.13416e+06
5	2	245	-245.826	34.5369	21.557	4.61823	0.407811	0.358498	0.469388	15.3586	21.0183	297496	6.14741e+06	331492	6.14132e+06	352711	6.13751e+06
5	2	246	-240.201	33.7344	19.9761	4.61478	0.40796	0.379343	0.441186	15.61	20.5729	298316	6.14817e+06	331553	6.14239e+06	351235	6.13898e+06
5	2	247	-233.741	35.7714	23.9672	4.61394	0.374383	0.333292	0.430361	15.1426	21.4371	295735	6.14372e+06	331505	6.1435e+06	355472	6.14335e+06
5	2	248	-232.189	35.1787	23.9153	4.61915	0.378163	0.349397	0.414679	15.5008	20.6247	296482	6.1459e+06	331635	6.14456e+06	355533	6.14365e+06
5	2	249	-233.511	30.1298	22.7755	4.664	0.444042	0.483172	0.409023	15.9002	20.4522	302007	6.15e+06	331817	6.14562e+06	354350	6.1423e+06
5	2	250	-224.297	33.4917	24.9111	5.38703	0.383708	0.383682	0.383738	15.5722	20.0517	298165	6.14805e+06	331656	6.14783e+06	356567	6.14767e+06
5	2	251	-223.025	33.1795	16.9524	5.90875	0.385123	0.394335	0.374923	15.7441	20.1919	298594	6.14843e+06	331770	6.1489e+06	348721	6.14914e+06
5	2	252	-216.215	29.4308	16.9449	6.34496	0.420919	0.467041	0.374762	14.7097	20.7539	302360	6.15138e+06	331758	6.15e+06	348684	6.1492e+06
5	2	253	-215.079	35.2543	20.9105	4.23284	0.349545	0.349003	0.350231	15.5542	20.0529	296560	6.14602e+06	331438	6.15116e+06	352125	6.15421e+06
5	2	254	-243.206	36.2866	24.8856	4.2191	0.384012	0.412626	0.359716	19.6241	27.1831	304788	6.17439e+06	333237	6.15187e+06	352748	6.13642e+06
5	2	255	-241.68	37.3964	28.3412	3.69485	0.370277	0.431534	0.324807	21.464	27.6829	307535	6.18003e+06	333312	6.15294e+06	352847	6.13241e+06
5	2	256	-242.036	29.7417	19.3791	5.2968	0.466259	0.450229	0.483175	14.4709	23.3149	303732	6.15618e+06	333394	6.15402e+06	352722	6.15261e+06
5	2	257	-240.268	29.919	18.7982	4.70453	0.46011	0.454003	0.466369	14.7752	23.0512	303592	6.15701e+06	333450	6.1551e+06	352210	6.1539e+06
5	2	258	-236.665	29.7701	18.3149	4.01028	0.455478	0.465415	0.44569	14.9975	22.982	303666	6.1567e+06	333431	6.15619e+06	351744	6.15588e+06
5	2	259	-229.263	31.1712	19.1901	3.21065	0.4214	0.409723	0.435015	14.3907	23.5326	302225	6.15378e+06	333192	6.15734e+06	352257	6.15953e+06
5	2	260	-235.819	30.1253	18.1992	3.81369	0.448498	0.532029	0.385747	17.2025	23.052	303900	6.16252e+06	333730	6.15831e+06	351751	6.15577e+06
5	2	261	-236.408	28.5947	20.0021	4.01075	0.473685	0.59491	0.391456	17.0379	23.7175	307193	6.16943e+06	333954	6.15936e+06	352673	6.15231e+06
5	2	262	-229.808	29.8692	18.4386	3.22531	0.440814	0.541064	0.366586	17.1622	22.9588	304004	6.16194e+06	333837	6.16048e+06	352253	6.15957e+06
5	2	263	-232.088	30.8486	18.5568	3.36035	0.431054	0.490987	0.381234	16.8455	22.909	303638	6.16546e+06	334230	6.16148e+06	352632	6.15909e+06
5	2	264	-203.49	33.1969	38.5085	1.50131	0.351208	0.424108	0.281629	16.9855	25.2163	302383	6.15177e+06	333296	6.16387e+06	369157	6.1779e+06
5	2	265	-205.242	30.0784	21.6108	2.78989	0.390956	0.460134	0.322664	15.1363	21.7054	307807	6.18025e+06	333661	6.16488e+06	352237	6.15384e+06
5	2	266	-198.387	28.9411	20.6624	2.67062	0.392748	0.505189	0.292935	15.3317	21.522	305239	6.17128e+06	333689	6.16597e+06	354000	6.16218e+06
5	2	267	-194.038	26.5874	29.7165	2.42436	0.418143	0.617709	0.274436	15.4572	21.9748	307300	6.16896e+06	333817	6.16703e+06	363456	6.16488e+06
5	2	268	-214.138	34.0939	20.922	2.73334	0.359861	0.378354	0.338755	15.922	22.1313	307821	6.1883e+06	335100	6.16785e+06	351840	6.1553e+06
5	2	269	-193.609	29.6863	20.6258	2.63909	0.373667	0.455356	0.289114	14.5875	20.726	306617	6.17912e+06	334548	6.16906e+06	353954	6.16208e+06
5	2	270	-202.208	31.0788	28.5969	2.61607	0.372777	0.426503	0.314878	14.9585	21.3541	304776	6.17499e+06	335446	6.16996e+06	363667	6.16534e+06
5	2	271	-197.732	30.2936	20.5767	2.64566	0.373974	0.434842	0.307521	14.4824	20.5543	307757	6.18337e+06	335435	6.17106e+06	354235	6.16269e+06
5	2	272	-197.171	30.3075	28.5592	2.54807	0.372744	0.444341	0.298062	14.8343	21.0194	306345	6.17869e+06	335914	6.17205e+06	363778	6.16578e+06
5	2	273	-198.866	32.0145	25.9516	2.56382	0.355902	0.410385	0.296091	15.261	20.4143	307256	6.18641e+06	336349	6.17305e+06	359932	6.16222e+06
5	2	274	-177.147	32.8536	33.9025	1.30253	0.308936	0.42639	0.195724	16.729	24.3543	303592	6.16569e+06	335279	6.17437e+06	367977	6.18332e+06
5	2	275	-201.044	32.0648	26.4119	2.72463	0.359235	0.392835	0.318854	14.5629	19.5693	307813	6.1883e+06	337858	6.17709e+06	362605	6.16787e+06
5	2	276	-179.798	32.2575	29.4645	2.20517	0.319354	0.371405	0.249254	13.7456	18.4751	308308	6.1926e+06	337231	6.17832e+06	363649	6.16527e+06
5	2	277	-205.81	36.0475	26.7576	2.87242	0.327122	0.338106	0.312906	15.7124	21.0551	309719	6.19974e+06	339194	6.17899e+06	361073	6.16359e+06
5	2	278	-174.163	31.022	31.4073	2.71801	0.321664	0.389253	0.232299	13.359	18.426	307252	6.18658e+06	337655	6.18041e+06	368436	6.17417e+06
5	2	279	-218.767	34.4435	25.3694	2.92816	0.363908	0.360955	0.367562	15.3956	20.6337	309148	6.19597e+06	340152	6.18097e+06	362989	6.16992e+06
5	2	280	-214.343	38.9509	26.6039	1.61737	0.31529	0.352514	0.277957	19.4469	36.1692	324187	6.21713e+06	340836	6.18192e+06	352208	6.15787e+06
5	2	281	-214.139	35.2253	29.002	3.23768	0.348305	0.36063	0.333764	16.1603	21.1389	309757	6.19891e+06	341154	6.18294e+06	367005	6.16979e+06
5	2	282	-198.392	34.3013	28.0541	3.1225	0.331384	0.363381	0.292023	15.3807	20.4499	307778	6.19161e+06	341448	6.18506e+06	368986	6.17971e+06
5	2	283	-198.858	34.5714	27.9171	3.10645	0.329567	0.359986	0.292018	15.4723	20.5424	307437	6.19084e+06	341500	6.18493e+06	369007	6.18016e+06
5	2	284	-211.28	34.9277	28.7763	3.22095	0.346582	0.354503	0.336692	15.5332	21.6431	310474	6.20124e+06	341874	6.18594e+06	367743	6.17333e+06
5	2	285	-189.751	32.6028	40.2941	1.29244	0.333462	0.426683	0.242364	16.4893	22.7033	309060	6.18073e+06	340946	6.18753e+06	380353	6.19594e+06
5	2	286	-208.076	35.3221	29.807	3.34022	0.337514	0.362259	0.308778	16.3429	21.1269	315008	6.20897e+06	343193	6.18768e+06	366978	6.16972e+06
5	2	287	-200.39	35.0375	29.322	2.1784	0.327689	0.510275	0.213599	21.5637	31.3164	327276	6.21991e+06	343361	6.18878e+06	356823	6.16273e+06
5	2	288	-190.576	33.8965	26.2114	2.44391	0.32213	0.391381	0.24763	16.3295	21.3366	309854	6.1942e+06	343477	6.1899e+06	369477	6.18658e+06
5	2	289	-198.944	34.2189	27.834	2.88133	0.333107	0.377043	0.282982	15.9839	20.5255	313774	6.2061e+06	344324	6.19069e+06	369175	6.17815e+06
5	2	290	-198.337	33.7039	29.4115	2.96368	0.337163	0.427578	0.254669	17.6242	21.8256	317732	6.21177e+06	344781	6.19166e+06	368384	6.17411e+06
5	2	291	-195.022	34.1976	24.6277	2.60042	0.326744	0.410121	0.246565	17.4333	20.3682	313335	6.20531e+06	345114	6.19268e+06	368000	6.18358e+06
5	2	292	-196.144	34.3528	24.4537	2.60215	0.327138	0.345351	0.302036	14.4443	20.7036	314217	6.20749e+06	345644	6.19361e+06	368014	6.18373e+06
5	2	293	-196.076	33.6493	25.6642	2.61266	0.333861	0.430291	0.246666	17.6709	21.5894	316772	6.21094e+06	346159	6.19455e+06	368572	6.18205e+06
5	2	294	-199.313	32.4546	25.4953	2.62248	0.351865	0.459578	0.259754	17.4945	23.3425	319080	6.21238e+06	346767	6.19545e+06	368517	6.18215e+06
5	2	295	-196.895	32.3668	24.3616	2.58089	0.34854	0.455257	0.255188	17.2646	23.4512	319027	6.21233e+06	347213	6.19642e+06	368427	6.18444e+06
5	2	296	-201.273	31.9524	24.2683	2.61263	0.36091	0.47155	0.268048	17.3721	24.852	320472	6.21373e+06	347873	6.19729e+06	368684	6.18481e+06
5	2	297	-202.366	31.2043	24.2381	2.60838	0.371569	0.518735	0.262902	17.9503	28.2456	322916	6.21612e+06	348461	6.1982e+06	368303	6.18428e+06
5	2	298	-203.182	31.7074	24.0085	2.58168	0.367148	0.49768	0.266364	17.8927	27.8855	321997	6.21574e+06	349001	6.19913e+06	369449	6.18654e+06
5	2	299	-192.598	32.5036	30.1674	2.55382	0.339499	0.458364	0.237636	17.5038	24.527	319189	6.21249e+06	349271	6.20018e+06	377191	6.18875e+06
5	2	300	-186.306	38.328	37.2247	2.04909	0.278504	0.342234	0.208302	18.2381	22.3718	310684	6.20164e+06	349012	6.20147e+06	386236	6.2013e+06
5	2	301	-192.159	31.8525	29.6389	2.49074	0.345649	0.478993	0.236267	17.4988	25.3716	320286	6.21356e+06	350036	6.20218e+06	377718	6.19159e+06
5	2	302	-194.28	29.788	26.2486	2.32509	0.373683	0.695077	0.213899	19.8967	26.1544	331302	6.22553e+06	350790	6.20301e+06	367962	6.18315e+06
5	2	303	-200.609	29.1868	24.9351	2.52476	0.393804	0.673782	0.243299	18.9829	26.4305	329578	6.22311e+06	351509	6.20385e+06	370244	6.1874e+06
6	0	304	-165.003	41.7542	41.6324	1.22531	0.226419	0.314345	0.129689	19.882	24.37	309390	6.19696e+06	350241	6.2056e+06	390973	6.21421e+06
6	0	305	-163.202	43.9015	42.6408	1.07284	0.212994	0.289757	0.122703	20.1732	27.6305	308817	6.19322e+06	350630	6.2066e+06	391241	6.2196e+06
6	0	306	-161.634	27.7308	31.5259	2.16588	0.333955	0.591134	0.148163	16.1002	23.1116	325841	6.21895e+06	351119	6.20755e+06	379857	6.19459e+06
6	0	307	-158.504	27.1436	31.5022	2.12674	0.334573	0.616295	0.137988	15.9879	23.4605	326618	6.21944e+06	351486	6.20856e+06	380347	6.19593e+06
6	0	308	-158.53	26.4985	31.3696	2.20331	0.342775	0.676491	0.135143	16.3355	23.758	328282	6.22116e+06	352062	6.20947e+06	380214	6.19563e+06
6	0	309	-153.649	26.6954	32.1545	2.14242	0.329771	0.647499	0.119918	16.0773	23.4112	327204	6.21985e+06	352231	6.21056e+06	382377	6.19938e+06
6	0	310	-157.823	26.4311	31.9948	2.18082	0.342115	0.689274	0.131684	16.4566	23.6178	328530	6.22169e+06	352891	6.21144e+06	382380	6.19903e+06
6	0	311	-158.99	28.4086	31.6863	2.21444	0.320656	0.652848	0.12496	17.8775	23.2108	330399	6.22887e+06	353499	6.21233e+06	379263	6.19389e+06
6	0	312	-154.584	26.0263	33.8324	1.85194	0.340305	0.701527	0.122118	16.226	22.9771	329489	6.22302e+06	353680	6.21343e+06	385128	6.20095e+06
6	0	313	-164.943	29.2539	31.4954	2.23772	0.323048	0.690723	0.133419	19.3003	23.4361	331201	6.2314e+06	354789	6.21409e+06	380185	6.19547e+06
6	0	314	-167.906	28.0948	34.1608	2.11217	0.342419	0.624654	0.160623	17.0883	23.4229	337964	6.23684e+06	355547	6.21492e+06	376927	6.18828e+06
6	0	315	-154.789	27.7057	34.9423	1.51006	0.320103	0.658146	0.115489	17.2594	24.6659	327685	6.22025e+06	355107	6.2163e+06	389691	6.21131e+06
6	0	316	-210.061	39.56	30.9874	1.99486	0.304234	0.339951	0.266875	19.3353	27.3547	342265	6.2523e+06	358172	6.21608e+06	370633	6.18771e+06
6	0	317	-218.477	33.7891	32.1185	2.36195	0.370463	0.5064	0.27915	20.2123	24.8307	341775	6.24822e+06	361193	6.22057e+06	379650	6.19429e+06
6	0	318	-217.729	27.4235	29.4392	2.49704	0.45489	0.639163	0.335959	16.6669	24.4104	338904	6.23664e+06	361759	6.22149e+06	386295	6.20522e+06
6	0	319	-177.581	39.0228	47.1679	1.23347	0.260735	0.432261	0.142715	23.1172	31.9752	323010	6.21617e+06	361223	6.22408e+06	407413	6.23363e+06
6	0	320	-218.411	48.3728	35.6559	1.96501	0.258699	0.267554	0.248663	22.6754	30.4165	344024	6.26938e+06	363822	6.22524e+06	378415	6.19271e+06
6	0	321	-219.661	27.84	29.3175	2.12798	0.452061	0.59042	0.352576	16.1953	24.8446	339098	6.23781e+06	364383	6.22616e+06	391009	6.21389e+06
6	0	322	-223.931	31.1	28.4252	2.22928	0.412543	0.498595	0.343994	17.3106	22.9251	340602	6.24604e+06	365105	6.22688e+06	387501	6.20938e+06
6	0	323	-224.761	31.5391	28.6334	2.22724	0.408306	0.50854	0.3331	18.0194	23.0671	342016	6.24849e+06	365756	6.22773e+06	387309	6.20888e+06
6	0	324	-224.976	30.357	28.7002	2.14615	0.424613	0.521828	0.350063	17.1815	22.9578	339989	6.24407e+06	366193	6.22875e+06	390968	6.21426e+06
6	0	325	-221.708	28.3612	26.0909	1.98255	0.447889	0.602587	0.343763	16.9517	22.4473	339728	6.23922e+06	366501	6.22986e+06	391131	6.22125e+06
6	0	326	-228.347	35.0876	29.8035	2.06666	0.372871	0.422825	0.329727	18.827	25.1978	343033	6.25603e+06	368011	6.23139e+06	389228	6.21046e+06
6	0	327	-222.266	31.5177	37.4915	1.74503	0.404048	0.517107	0.321552	18.222	27.43	336942	6.23462e+06	368385	6.23246e+06	405788	6.22987e+06
6	0	328	-162.042	40.5604	50.8494	0.953814	0.2289	0.604998	0.082504	29.1964	33.982	328456	6.22158e+06	366679	6.23514e+06	414600	6.25215e+06
6	0	329	-186.104	31.3947	40.7899	1.47779	0.339639	0.496176	0.215958	17.538	27.1275	336943	6.2346e+06	368332	6.23521e+06	409114	6.23599e+06
6	0	330	-202.362	66.8485	45.2456	1.1957	0.173444	0.238146	0.124257	37.9778	45.3801	358150	6.30151e+06	369521	6.23563e+06	377218	6.19105e+06
6	0	331	-178.769	29.9372	37.9807	1.62658	0.342136	0.534187	0.197298	17.0666	21.2258	339878	6.2448e+06	368904	6.23747e+06	405729	6.22817e+06
6	0	332	-160.063	39.4709	46.7941	1.07336	0.232346	0.326293	0.124755	18.3997	30.1798	330416	6.22923e+06	368654	6.23902e+06	413986	6.25063e+06
6	0	333	-186.015	36.7103	28.9892	1.80856	0.290321	0.391356	0.197592	19.1422	32.0921	343586	6.26414e+06	370371	6.23904e+06	391522	6.21921e+06
6	0	334	-187.198	35.7381	27.4456	1.80139	0.300115	0.411318	0.202398	19.0227	25.5699	343373	6.26255e+06	371675	6.24073e+06	393410	6.22397e+06
6	0	335	-193.224	32.2209	36.9819	1.80962	0.34359	0.487258	0.231654	18.1107	23.6655	340662	6.24611e+06	372538	6.24141e+06	409124	6.23601e+06
6	0	336	-193.435	41.6027	27.7481	1.81523	0.266399	0.336561	0.198708	21.1742	30.288	344704	6.27248e+06	373248	6.24221e+06	392285	6.22202e+06
6	0	337	-175.378	32.3701	42.3574	1.10422	0.31042	0.558015	0.158257	20.0491	25.5906	340062	6.23976e+06	372087	6.24447e+06	413994	6.25064e+06
6	0	338	-215.809	39.7764	28.0889	1.81494	0.310858	0.423089	0.233334	23.526	28.7673	343512	6.26872e+06	374582	6.24388e+06	396522	6.22634e+06
6	0	339	-195.633	73.2665	45.6805	1.18144	0.152989	0.175494	0.127123	34.0886	45.3674	360419	6.31686e+06	374848	6.24503e+06	383844	6.20024e+06
6	0	340	-161.757	34.3184	40.1529	1.36413	0.270056	0.473468	0.120849	19.7972	25.5276	340140	6.24329e+06	374275	6.24683e+06	414214	6.25098e+06
6	0	341	-202.71	47.4911	28.4592	2.04428	0.244558	0.32096	0.181778	26.0696	32.9056	345191	6.28218e+06	376484	6.24646e+06	395236	6.22505e+06
6	0	342	-199.244	66.9401	44.5559	1.30781	0.170538	0.211715	0.131738	34.465	45.4894	363608	6.31298e+06	377025	6.24739e+06	385955	6.20374e+06
6	0	343	-159.559	36.4145	41.1976	1.34199	0.251053	0.466728	0.104528	21.6835	27.0795	340022	6.24395e+06	376003	6.24955e+06	416711	6.25588e+06
6	0	344	-212.836	50.2988	27.6641	2.0001	0.242442	0.293861	0.197721	26.9019	33.1969	343788	6.28521e+06	378584	6.24889e+06	397721	6.22891e+06
6	0	345	-217.349	73.9935	47.1316	1.31647	0.168301	0.193173	0.145248	38.4012	49.8102	368968	6.32327e+06	378958	6.24995e+06	385321	6.20325e+06
6	0	346	-214.589	42.3139	32.8851	2.17842	0.290565	0.416001	0.210169	25.7866	32.1134	345813	6.27574e+06	379853	6.25061e+06	406309	6.23107e+06
6	0	347	-200.06	36.2289	34.264	1.79488	0.31639	0.487736	0.207255	22.1325	27.7839	343163	6.25609e+06	379211	6.25246e+06	413303	6.24904e+06
6	0	348	-196.511	38.5705	32.473	2.01238	0.291911	0.4031	0.20376	21.5143	34.3416	342805	6.26159e+06	380384	6.2529e+06	412023	6.24559e+06
6	0	349	-157.73	37.1497	37.9794	1.37822	0.243265	0.451246	0.0986515	21.9133	27.0202	341990	6.25403e+06	379119	6.25525e+06	417079	6.25649e+06
6	0	350	-165.728	39.0377	44.3696	1.04955	0.243238	0.484171	0.105487	24.8375	30.0686	341513	6.248e+06	379689	6.25616e+06	423080	6.26543e+06
6	0	351	-171.118	43.9807	38.87	1.71513	0.222923	0.361428	0.117352	24.9578	30.8286	354859	6.292e+06	380907	6.25656e+06	403929	6.22524e+06
6	0	352	-185.981	60.2686	36.4083	1.42255	0.176807	0.245926	0.117	32.3112	42.8451	366728	6.31508e+06	382275	6.25685e+06	391667	6.22167e+06
6	0	353	-163.258	39.4818	33.0243	1.73699	0.236918	0.427772	0.105876	23.4093	29.5798	344268	6.27144e+06	381637	6.2587e+06	412894	6.24804e+06
6	0	354	-173.756	40.5687	31.6875	1.99523	0.245396	0.438358	0.123771	24.8843	30.9432	345213	6.2735e+06	383077	6.25893e+06	412652	6.24756e+06
6	0	355	-173.809	61.4665	34.103	1.72203	0.162015	0.206029	0.109735	28.0952	38.1835	359622	6.31614e+06	383876	6.25966e+06	397333	6.22833e+06
6	0	356	-216.238	74.9888	38.0357	1.46643	0.165218	0.188067	0.143482	38.4303	45.1055	374117	6.33344e+06	385957	6.25939e+06	391963	6.22183e+06
6	0	357	-158.92	40.022	34.2282	1.63265	0.22751	0.492468	0.0855672	26.061	31.5035	344228	6.26568e+06	384098	6.2622e+06	418197	6.25922e+06
6	0	358	-166.504	44.0765	41.6028	1.21093	0.21644	0.451001	0.0924141	28.8318	34.4177	342247	6.25279e+06	385194	6.2627e+06	425731	6.27206e+06
6	0	359	-167.37	41.4176	31.7114	2.09102	0.231534	0.375721	0.117401	23.1184	28.9053	353388	6.28932e+06	386479	6.26441e+06	411815	6.24534e+06
6	0	360	-209.693	44.3316	28.7388	2.46665	0.271014	0.402259	0.18866	27.2397	33.9807	346615	6.27726e+06	388882	6.26389e+06	416282	6.25522e+06
6	0	361	-173.593	45.7208	36.7248	1.56347	0.21754	0.447849	0.101112	30.3688	36.5666	343095	6.26223e+06	388584	6.26683e+06	425123	6.27052e+06
6	0	362	-213.07	44.7914	26.3678	2.62405	0.272551	0.366173	0.204978	26.015	31.1079	352027	6.28886e+06	391058	6.26688e+06	414036	6.25395e+06
6	0	363	-192.836	57.1304	36.0292	2.17596	0.193393	0.229469	0.153606	27.168	35.8317	359679	6.31618e+06	390833	6.26829e+06	410481	6.23809e+06
6	0	364	-184.656	47.6931	34.66	1.76372	0.221835	0.41446	0.1191	31.1043	37.5727	343294	6.26704e+06	390923	6.2695e+06	425537	6.27129e+06
6	0	365	-189.57	42.832	28.4656	2.53539	0.253584	0.371318	0.163929	24.3158	32.3759	355767	6.29298e+06	391975	6.2701e+06	416038	6.25489e+06
6	0	366	-220.301	73.5819	45.8202	1.90178	0.171541	0.159153	0.189156	30.3814	49.8228	375860	6.34159e+06	393774	6.27022e+06	404929	6.22578e+06
6	0	367	-223.287	58.4899	37.6042	2.23666	0.218728	0.255431	0.187436	31.5729	37.2792	370741	6.32466e+06	394324	6.27113e+06	409487	6.23672e+06
6	0	368	-218.969	46.0844	27.0135	2.80656	0.272238	0.335817	0.221412	25.6107	33.678	355756	6.29635e+06	394901	6.27203e+06	417847	6.25778e+06
6	0	369	-180.382	51.1438	37.1616	1.6864	0.202079	0.37867	0.104878	32.9871	40.6107	343261	6.26714e+06	393955	6.2739e+06	430790	6.27882e+06
6	0	370	-184.7	50.7281	36.4635	1.75737	0.208611	0.367074	0.115852	31.9978	40.3073	344162	6.26952e+06	394621	6.27475e+06	430890	6.2785e+06
6	0	371	-186.883	44.9921	28.8702	2.51816	0.237986	0.345503	0.152718	25.0924	33.078	359684	6.30313e+06	395267	6.2756e+06	418100	6.25793e+06
6	0	372	-199.089	48.8374	28.1816	2.72731	0.233569	0.306703	0.171515	26.4202	32.5	364137	6.31329e+06	398510	6.2786e+06	418345	6.25858e+06
6	0	373	-192.113	46.4384	28.4754	2.62512	0.237028	0.342852	0.156597	26.3848	32.6139	361194	6.3076e+06	398462	6.2799e+06	421314	6.26291e+06
6	0	374	-179.765	55.5915	32.0649	2.08073	0.185275	0.248411	0.122672	27.9139	33.8964	343155	6.28428e+06	398653	6.28104e+06	430663	6.27918e+06
6	0	375	-171.309	45.6977	32.2246	2.13967	0.214787	0.344318	0.114258	25.7295	34.6246	353772	6.28972e+06	398845	6.28219e+06	430629	6.27688e+06
6	0	376	-164.771	51.9765	34.5964	1.72183	0.181633	0.268916	0.0971324	26.4092	34.6265	346976	6.28712e+06	398823	6.28347e+06	433334	6.28104e+06
6	0	377	-177.085	45.915	29.6402	2.56324	0.220977	0.334768	0.128884	25.3772	29.6545	367333	6.31565e+06	400359	6.28376e+06	421679	6.26316e+06
6	0	378	-194.649	78.128	47.2408	1.7614	0.142747	0.229117	0.0888847	48.1195	63.2313	388517	6.36098e+06	401943	6.28401e+06	410061	6.23747e+06
6	0	379	-214.127	66.9531	35.5684	2.17753	0.18324	0.252103	0.135911	39.6808	53.9239	381968	6.34819e+06	402976	6.28462e+06	414136	6.25085e+06
6	0	380	-171.444	56.7166	35.9807	1.61485	0.173195	0.256123	0.0986713	29.8723	37.3886	345173	6.28302e+06	401773	6.28665e+06	437680	6.28896e+06
6	0	381	-198.729	47.7273	27.3588	2.85498	0.238569	0.319645	0.172052	26.2178	32.2851	360513	6.30652e+06	403877	6.28658e+06	428734	6.27515e+06
6	0	382	-223.065	78.6764	45.496	1.83814	0.162446	0.22899	0.121378	48.6513	63.722	394302	6.36504e+06	405040	6.2871e+06	411250	6.24203e+06
6	0	383	-192.264	54.4192	27.4756	2.85047	0.202426	0.243514	0.158122	26.1849	31.8608	356801	6.31396e+06	404881	6.28847e+06	429156	6.2756e+06
6	0	384	-201.059	48.4729	26.6657	2.88325	0.237653	0.314258	0.174633	26.5946	33.0934	360695	6.3068e+06	405834	6.28913e+06	430665	6.27941e+06
6	0	385	-170.157	50.7655	34.3239	1.87644	0.192045	0.339832	0.0941187	30.5337	38.2637	354087	6.29039e+06	404848	6.29103e+06	439170	6.29146e+06
6	0	386	-178.506	50.2856	31.8866	2.37352	0.20339	0.315539	0.117634	28.4962	37.2205	356056	6.29665e+06	406078	6.29151e+06	437798	6.28825e+06
6	0	387	-170.959	48.1948	28.9322	2.54745	0.203242	0.272769	0.127008	22.9887	31.46	366492	6.32029e+06	406069	6.29278e+06	429827	6.27627e+06
6	0	388	-171.144	53.1561	29.7353	2.54019	0.184472	0.218021	0.135537	21.6202	30.2473	356777	6.3115e+06	406817	6.29357e+06	434810	6.28354e+06
6	0	389	-209.352	74.7394	39.1282	1.98207	0.160491	0.249616	0.108475	47.1952	61.7576	398293	6.36719e+06	409290	6.29326e+06	415047	6.25456e+06
6	0	390	-205.515	71.8907	32.9971	2.1735	0.163792	0.22884	0.117088	41.8458	57.5576	392964	6.36418e+06	409706	6.29426e+06	417390	6.26218e+06
6	0	391	-214.187	50.1665	26.7779	3.11534	0.244624	0.353245	0.175765	30.7029	39.1452	372990	6.32796e+06	410715	6.29489e+06	430851	6.27724e+06
6	0	392	-195.008	49.9001	28.2869	2.85136	0.223909	0.27355	0.17353	24.7659	32.7254	363260	6.31281e+06	410727	6.29741e+06	437635	6.28869e+06
6	0	393	-167.795	54.4312	30.6487	2.3085	0.176625	0.285341	0.0902713	30.3357	39.8641	356276	6.29721e+06	410680	6.29891e+06	441314	6.29986e+06
7	0	394	-184.87	55.2077	27.5658	3.22833	0.191861	0.309895	0.112556	33.0214	44.3177	376111	6.34185e+06	415500	6.30316e+06	435167	6.28385e+06
7	0	395	-210.798	58.6781	27.8897	3.2175	0.205831	0.340971	0.135077	38.5139	48.4629	382287	6.35081e+06	416819	6.30337e+06	433232	6.28082e+06
7	0	396	-199.914	59.1639	28.5397	3.18257	0.193601	0.302161	0.125756	36.4096	49.6377	386398	6.35472e+06	417379	6.30432e+06	432324	6.28e+06
7	0	397	-198.152	53.7531	25.2025	3.78552	0.211211	0.341545	0.133178	33.6228	43.6781	375457	6.33777e+06	418127	6.30508e+06	438133	6.28975e+06
7	0	398	-203.308	55.0627	26.4083	3.71873	0.211552	0.367738	0.131253	36.3662	47.1067	381764	6.34636e+06	418958	6.30576e+06	436796	6.28629e+06
7	0	399	-188.453	52.5688	25.8689	3.52125	0.205398	0.363209	0.116592	33.6392	42.4325	374282	6.33417e+06	419261	6.30695e+06	441394	6.29356e+06
7	0	400	-203.694	55.5658	24.7418	3.75825	0.210035	0.352601	0.132956	36.0667	46.5847	380164	6.3456e+06	420430	6.30731e+06	438359	6.29026e+06
7	0	401	-174.725	50.7726	22.685	3.43421	0.197172	0.369457	0.0974874	32.1631	40.3005	373054	6.32812e+06	420124	6.30909e+06	441155	6.30059e+06
7	0	402	-174.637	54.5705	25.7058	3.67592	0.183358	0.32913	0.0929446	33.6809	40.3353	366871	6.31809e+06	420823	6.3099e+06	446237	6.30604e+06
7	0	403	-176.333	54.694	26.2757	3.53856	0.18472	0.341245	0.0934298	34.546	43.4873	377433	6.34335e+06	421405	6.31082e+06	442530	6.2952e+06
7	0	404	-173.858	54.3901	26.2079	3.49843	0.183145	0.353319	0.0883413	34.9306	44.9336	379050	6.3448e+06	422135	6.3116e+06	442896	6.29561e+06
7	0	405	-168.753	54.2964	26.1878	3.53015	0.178075	0.378297	0.0773313	36.1218	45.848	381968	6.3482e+06	422814	6.31243e+06	442515	6.29518e+06
7	0	406	-169.588	53.9079	22.3369	3.97577	0.180246	0.401682	0.0772248	36.7914	45.3396	380292	6.34566e+06	423426	6.31332e+06	441299	6.29993e+06
7	0	407	-197.481	59.9362	29.854	3.34306	0.188781	0.300937	0.119693	37.0895	46.3055	401365	6.36845e+06	424946	6.31334e+06	436692	6.2859e+06
7	0	408	-188.653	59.7708	31.6202	3.23652	0.18084	0.343612	0.0989275	39.7615	50.7237	407859	6.37108e+06	425749	6.31405e+06	435213	6.28388e+06
7	0	409	-178.986	56.0159	21.0873	4.24196	0.183075	0.369043	0.0903999	37.3855	46.2046	378210	6.3443e+06	426083	6.31521e+06	444105	6.30427e+06
7	0	410	-181.636	55.3806	21.7053	3.92426	0.187916	0.346664	0.0993446	35.5475	46.0543	375401	6.33723e+06	426622	6.31618e+06	446698	6.30793e+06
7	0	411	-166.053	55.1864	20.9811	4.24499	0.172399	0.354419	0.0737306	35.7873	45.9447	375379	6.33712e+06	426913	6.31738e+06	446506	6.30988e+06
7	0	412	-167.459	54.825	22.0457	4.24846	0.175006	0.298566	0.0855187	31.7968	46.6388	381968	6.34806e+06	427815	6.318e+06	446250	6.30591e+06
7	0	413	-165.556	56.7803	21.3439	3.7539	0.167058	0.337157	0.0717313	36.388	44.829	387191	6.35801e+06	428384	6.31893e+06	443868	6.30424e+06
7	0	414	-167.936	57.9566	20.7807	3.89099	0.16602	0.303236	0.0778421	35.2831	45.6135	392023	6.36363e+06	429454	6.31938e+06	442875	6.30352e+06
7	0	415	-177.216	53.6949	29.4192	3.59112	0.1891	0.472308	0.083761	39.138	48.7287	415879	6.37121e+06	430753	6.31961e+06	438903	6.29135e+06
7	0	416	-169.675	57.1179	20.9962	4.79331	0.170203	0.297719	0.0836509	34.0241	45.7889	395644	6.36547e+06	431143	6.32072e+06	444192	6.30427e+06
7	0	417	-162.978	57.1657	19.1267	3.61965	0.163348	0.290402	0.0735276	33.4901	48.0783	379706	6.34545e+06	431695	6.32167e+06	449090	6.31372e+06
7	0	418	-160.917	58.6462	18.705	3.89067	0.157211	0.295606	0.0662481	35.3874	42.5491	388292	6.36082e+06	432546	6.32234e+06	446661	6.31006e+06
7	0	419	-167.368	55.5716	21.7814	4.28789	0.17256	0.33563	0.0773513	35.0865	45.648	402436	6.36897e+06	433506	6.3229e+06	445684	6.30484e+06
7	0	420	-166.798	56.0561	19.0451	4.02804	0.170487	0.316962	0.0780269	34.3645	41.7088	399399	6.36759e+06	434235	6.32368e+06	446071	6.30876e+06
7	0	421	-173.252	56.9486	16.9651	4.09909	0.174308	0.308722	0.0879844	34.6781	43.4799	396211	6.36599e+06	435070	6.32436e+06	446647	6.31195e+06
7	0	422	-161.068	57.7546	24.4062	3.75688	0.159789	0.32227	0.0646084	36.4202	43.9982	387128	6.35718e+06	435594	6.32577e+06	456075	6.3125e+06
7	0	423	-174.084	56.4706	18.112	3.92141	0.176627	0.325362	0.0876869	35.339	45.4943	398597	6.36754e+06	436924	6.32607e+06	449216	6.31277e+06
7	0	424	-167.071	53.438	18.22	3.83087	0.179131	0.379012	0.0764059	35.2977	44.2191	406619	6.37073e+06	437407	6.32705e+06	447905	6.31216e+06
7	0	425	-173.247	57.0214	23.17	4.00646	0.17408	0.300521	0.0893544	34.143	42.568	395689	6.36551e+06	438343	6.32767e+06	455674	6.31229e+06
7	0	426	-162.04	57.9952	24.6143	3.91929	0.160085	0.291778	0.0699574	34.4313	45.6052	392682	6.36403e+06	438708	6.32875e+06	458242	6.31377e+06
7	0	427	-156.188	63.0876	30.7714	3.25015	0.141849	0.281779	0.0535945	38.6875	52.6741	377071	6.34289e+06	438833	6.33002e+06	468958	6.32375e+06
7	0	428	-155.356	59.5919	27.8561	3.65701	0.14937	0.306719	0.0544909	37.1759	46.4201	387093	6.35861e+06	439729	6.33067e+06	464334	6.31761e+06
7	0	429	-165.122	46.4243	19.9729	3.68631	0.203789	0.751688	0.0693519	37.2781	41.2657	417494	6.37132e+06	440808	6.33117e+06	450838	6.3139e+06
7	0	430	-165.501	51.2407	24.271	3.72624	0.185058	0.472984	0.0710268	36.7046	42.3037	408506	6.37136e+06	441397	6.33207e+06	456976	6.31346e+06
7	0	431	-170.472	52.2604	25.7082	3.82548	0.186897	0.354282	0.0880218	32.8539	42.7772	405838	6.37007e+06	442346	6.33267e+06	460306	6.31428e+06
7	0	432	-162.934	56.2261	27.3104	3.91246	0.166033	0.296003	0.0745463	32.9985	44.0357	396911	6.36652e+06	442643	6.33381e+06	464855	6.31792e+06
7	0	433	-164.64	53.8068	26.4014	4.13198	0.175315	0.330295	0.0775269	32.9908	43.5109	402620	6.36903e+06	443725	6.33431e+06	463894	6.31727e+06
7	0	434	-169.564	54.7379	24.9245	3.72294	0.177487	0.39299	0.0762517	37.2428	42.3358	422018	6.38457e+06	444808	6.3348e+06	455185	6.31214e+06
7	0	435	-158.13	52.1636	26.8048	3.92488	0.173687	0.44119	0.0597238	36.5799	42.1469	405591	6.36996e+06	445120	6.33592e+06	465432	6.31843e+06
7	0	436	-158.711	57.9106	26.409	3.81772	0.157025	0.28414	0.0657892	33.7133	45.8817	395628	6.36546e+06	445884	6.33668e+06	468802	6.32356e+06
7	0	437	-160.42	48.5324	26.7097	3.9408	0.189386	0.545351	0.0644646	35.9253	41.0444	412692	6.3721e+06	446655	6.33743e+06	465347	6.31835e+06
7	0	438	-160.016	45.1567	26.394	3.98323	0.20303	0.702953	0.0648096	35.3764	40.9204	419997	6.37375e+06	447619	6.33802e+06	463764	6.31714e+06
7	0	439	-164.974	44.9323	26.358	3.9158	0.210366	0.708515	0.0731447	35.2287	40.8355	416928	6.37119e+06	448200	6.33893e+06	466545	6.32e+06
7	0	440	-162.385	55.91	23.1171	3.72943	0.16641	0.305734	0.0726623	33.4218	44.4302	400400	6.36804e+06	448708	6.33989e+06	468681	6.32825e+06
7	0	441	-160.782	53.7892	22.8794	3.708	0.171263	0.406852	0.0633406	36.8902	42.3928	404061	6.36974e+06	449360	6.34074e+06	468628	6.3284e+06
7	0	442	-164.964	45.6915	25.7328	3.73693	0.206859	0.638767	0.0737583	34.9283	39.2453	415292	6.37113e+06	450092	6.34152e+06	469691	6.32484e+06
7	0	443	-168.975	45.2003	25.8304	3.70966	0.214191	0.611396	0.0826402	33.9551	39.9884	418527	6.37386e+06	450859	6.34227e+06	469335	6.32422e+06
7	0	444	-166.882	46.8442	21.6684	3.65224	0.204115	0.571445	0.0771591	34.8128	39.2323	413980	6.37143e+06	451380	6.34322e+06	468679	6.33018e+06
7	0	445	-163.086	52.8108	21.4019	3.59564	0.176936	0.429249	0.0670943	36.7936	42.09	405997	6.37022e+06	451928	6.34416e+06	470542	6.33359e+06
7	0	446	-164.922	44.3863	21.8783	3.66138	0.212888	0.65421	0.0759759	33.8772	39.9894	418018	6.37258e+06	452712	6.34489e+06	469813	6.33125e+06
7	0	447	-168.542	41.739	22.0386	3.6509	0.231359	0.686555	0.0876677	31.725	38.2607	425068	6.37618e+06	453507	6.34563e+06	468522	6.32949e+06
7	0	448	-169.537	43.2812	21.8639	3.72505	0.224433	0.642311	0.0871243	32.5773	38.0425	423032	6.37647e+06	454200	6.34644e+06	469944	6.33127e+06
7	0	449	-167.283	43.5282	18.5011	3.69764	0.220192	0.643669	0.0824774	32.8469	38.7806	420257	6.3738e+06	454807	6.34732e+06	469492	6.33607e+06
7	0	450	-156.88	58.0638	25.9271	3.34531	0.154804	0.337527	0.056058	37.6938	44.4307	400217	6.36794e+06	454956	6.34858e+06	479399	6.33993e+06
7	0	451	-161.817	50.2646	25.0708	3.45136	0.184452	0.453484	0.0682533	35.1034	40.0253	410906	6.3719e+06	455791	6.34928e+06	478179	6.33799e+06
7	0	452	-147.67	58.0575	25.7083	3.08499	0.145732	0.335868	0.0421793	37.5869	43.8363	400166	6.36792e+06	455637	6.35078e+06	480199	6.34319e+06
7	0	453	-155.478	54.2612	25.2158	3.20684	0.164173	0.38099	0.05613	36.2151	42.5438	405577	6.36996e+06	456565	6.3514e+06	480260	6.34278e+06
7	0	454	-177.155	54.8812	32.7031	3.00361	0.184948	0.245087	0.122064	26.8281	44.1171	444412	6.40457e+06	458201	6.35145e+06	466418	6.31979e+06
7	0	455	-163.409	48.3587	20.2689	3.3779	0.193608	0.327046	0.0909855	27.3359	38.0065	428936	6.39115e+06	458310	6.35273e+06	470621	6.33663e+06
7	0	456	-176.71	43.2349	24.0854	3.54403	0.234179	0.483301	0.112008	29.0091	37.7572	424075	6.37808e+06	459434	6.3532e+06	479131	6.33934e+06
7	0	457	-178.781	48.6229	20.3243	3.43676	0.210669	0.318457	0.124584	27.0331	38.0777	434288	6.39507e+06	460216	6.35394e+06	471054	6.33674e+06
7	0	458	-152.179	69.2353	27.1064	2.7797	0.125936	0.25491	0.0436253	42.2632	51.7263	390816	6.36277e+06	459693	6.35574e+06	486660	6.35299e+06
8	3	459	-155.591	68.4973	29.1774	2.93032	0.130146	0.254672	0.0491374	41.5001	50.8917	392398	6.36389e+06	460492	6.35647e+06	489498	6.35331e+06
8	3	460	-153.201	45.4065	20.2742	3.22634	0.193314	0.360795	0.0721914	26.3502	36.8245	424008	6.3839e+06	460939	6.35748e+06	477428	6.34569e+06
8	3	461	-179.47	51.1759	22.0584	3.13819	0.200931	0.232496	0.157723	21.6036	38.9079	445803	6.40555e+06	462851	6.3573e+06	470199	6.3365e+06
8	3	462	-177.666	49.8283	23.549	3.06879	0.204291	0.236001	0.159651	20.6952	39.1317	443174	6.4041e+06	463139	6.35844e+06	472575	6.33687e+06
8	3	463	-161.874	47.1518	27.6377	3.05085	0.196698	0.57272	0.0682614	35.1472	42.1352	417798	6.3716e+06	463686	6.36076e+06	490582	6.3544e+06
8	3	464	-159.708	44.4887	20.9513	3.16081	0.205682	0.309931	0.101999	22.3049	33.8004	434077	6.39469e+06	464185	6.36194e+06	478364	6.34652e+06
8	3	465	-171.242	45.413	19.6734	3.33995	0.216049	0.275273	0.143665	20.4362	34.5038	434426	6.39558e+06	465528	6.36249e+06	479001	6.34815e+06
8	3	466	-170.139	46.7082	20.9719	3.24316	0.208704	0.237112	0.162197	17.7115	35.5082	439470	6.40165e+06	466184	6.36333e+06	478178	6.34613e+06
8	3	467	-177.462	46.692	22.4925	3.42264	0.217763	0.239418	0.183165	17.9746	35.3227	437166	6.39964e+06	467229	6.36392e+06	481711	6.34671e+06
8	3	468	-174.929	44.8773	24.0272	3.47545	0.223334	0.255118	0.175552	17.9273	34.6985	434183	6.39487e+06	467623	6.36494e+06	485526	6.34892e+06
8	3	469	-181.038	45.2825	22.3096	3.57952	0.229066	0.253549	0.192519	18.1656	34.9497	432045	6.3925e+06	468498	6.36564e+06	486457	6.35241e+06
8	3	470	-179.81	45.565	23.0651	3.54849	0.226102	0.242338	0.19931	17.1936	35.387	434754	6.39657e+06	469041	6.36656e+06	486398	6.35137e+06
8	3	471	-172.939	48.4113	23.5131	3.82643	0.204676	0.268721	0.132885	22.8255	37.2879	425409	6.38781e+06	469401	6.36761e+06	490768	6.35779e+06
8	3	472	-167.765	47.0574	22.6801	3.18028	0.204265	0.400753	0.091526	29.9013	41.6403	422732	6.37525e+06	469361	6.36892e+06	491835	6.36587e+06
8	3	473	-187.019	45.1382	23.0595	3.56158	0.237389	0.261561	0.203685	18.852	33.623	440897	6.40268e+06	471042	6.36908e+06	486442	6.35192e+06
8	3	474	-177.095	43.2287	25.9006	3.5471	0.234721	0.24974	0.208384	15.6983	33.5492	449272	6.40727e+06	471394	6.37013e+06	484648	6.34788e+06
8	3	475	-175.769	47.2094	20.4309	3.82679	0.213322	0.228966	0.185979	17.1812	35.3493	429341	6.39131e+06	471970	6.37103e+06	490418	6.36225e+06
8	3	476	-176.783	45.0882	23.1672	3.93165	0.224645	0.255755	0.178707	18.2052	33.9794	437525	6.39997e+06	472733	6.3718e+06	490823	6.35733e+06
8	3	477	-167.208	46.151	20.1833	3.69663	0.207585	0.237041	0.157755	17.1457	34.1658	430962	6.39231e+06	472875	6.37299e+06	491205	6.36455e+06
8	3	478	-166.424	49.1679	26.6246	3.61984	0.193935	0.214782	0.155039	17.1565	36.3951	426751	6.38935e+06	473429	6.37391e+06	498706	6.36554e+06
8	3	479	-162.892	44.8342	20.0458	3.72175	0.208167	0.251127	0.140786	17.4559	33.3795	435047	6.39715e+06	473940	6.37485e+06	491330	6.36488e+06
8	3	480	-161.038	44.5724	19.9017	3.80218	0.207006	0.256093	0.132653	17.7249	33.2876	436759	6.39933e+06	474562	6.37572e+06	491441	6.36518e+06
8	3	481	-164.004	42.8965	20.1454	3.84708	0.219055	0.249069	0.164875	15.2918	30.3279	441848	6.4034e+06	475284	6.37652e+06	490986	6.3639e+06
8	3	482	-175.37	40.8689	20.61	3.81314	0.245857	0.281084	0.193343	16.4085	30.7285	447654	6.40656e+06	476129	6.37724e+06	490488	6.36246e+06
8	3	483	-152.709	49.9414	20.2255	3.92208	0.175197	0.216297	0.103233	18.1543	35.7785	427054	6.38968e+06	475785	6.37876e+06	495521	6.37433e+06
8	3	484	-163.61	45.485	18.2312	4.11725	0.206093	0.217868	0.17941	13.9272	34.1569	434421	6.39552e+06	476911	6.37929e+06	493942	6.37278e+06
8	3	485	-165.427	39.4274	21.3031	3.75672	0.240397	0.28037	0.174628	14.9046	29.8986	447849	6.40666e+06	477224	6.38037e+06	493096	6.36616e+06
8	3	486	-162.171	45.4053	19.3872	4.12518	0.204639	0.224855	0.162949	14.828	34.039	434253	6.395e+06	477577	6.38141e+06	496076	6.37561e+06
8	3	487	-167.505	42.7786	19.109	4.21185	0.224348	0.247379	0.181633	14.9854	29.9479	440513	6.40243e+06	478237	6.38226e+06	495088	6.37325e+06
8	3	488	-157.757	44.6844	18.6249	4.44465	0.20228	0.229955	0.146316	14.7853	30.3111	436432	6.39898e+06	478340	6.38348e+06	495807	6.37701e+06
8	3	489	-155.967	45.5253	17.9353	4.38665	0.196291	0.225112	0.137538	14.983	33.214	435382	6.39778e+06	478893	6.38439e+06	496034	6.37911e+06
8	3	490	-162.194	39.4049	19.3013	4.54262	0.235834	0.234974	0.238314	10.1443	28.4447	445445	6.40528e+06	479423	6.38532e+06	496067	6.37555e+06
8	3	491	-159.864	42.1625	17.6639	4.3134	0.217243	0.213214	0.230348	9.91569	29.8956	440814	6.40262e+06	479731	6.3864e+06	496035	6.3796e+06
8	3	492	-163.775	37.8925	17.8397	4.56129	0.247636	0.244395	0.256979	9.75987	28.8545	448154	6.40683e+06	480534	6.38715e+06	495779	6.37788e+06
8	3	493	-166.194	33.1035	19.4898	4.44383	0.287648	0.32019	0.227566	11.6305	26.548	456335	6.40992e+06	481157	6.38802e+06	495771	6.37512e+06
8	3	494	-167.26	33.9041	17.5414	4.58433	0.282656	0.306685	0.235753	11.4856	26.8014	454268	6.40869e+06	481783	6.38888e+06	496019	6.37863e+06
8	3	495	-178.794	38.1631	16.9206	4.30934	0.268428	0.248327	0.321553	10.476	28.7086	447764	6.40662e+06	482098	6.38996e+06	497321	6.38257e+06
8	3	496	-142.521	58.9317	28.1028	2.18871	0.138564	0.143357	0.117614	10.9711	48.8818	423971	6.37976e+06	481398	6.393e+06	508783	6.39931e+06
8	3	497	-144.387	36.0921	19.7742	3.53731	0.229212	0.249697	0.163292	8.55686	28.0593	456903	6.41951e+06	482188	6.39375e+06	496041	6.37964e+06
8	3	498	-141.842	32.0755	18.3518	3.79452	0.253368	0.299151	0.137638	9.0923	23.991	453095	6.40825e+06	482294	6.39497e+06	499000	6.38737e+06
8	3	499	-146.426	31.0295	17.2443	3.80147	0.270374	0.308611	0.173024	8.7509	24.0574	455229	6.40927e+06	483131	6.39569e+06	498638	6.38815e+06
8	3	500	-140.166	31.0086	23.6984	3.5443	0.258989	0.292807	0.153496	7.52747	23.5037	454434	6.40876e+06	483122	6.39699e+06	505046	6.38799e+06
8	3	501	-143.253	32.5124	23.2447	3.5386	0.25245	0.274921	0.177555	7.50357	23.9362	453052	6.40823e+06	483842	6.39779e+06	505855	6.39032e+06
8	3	502	-154.512	41.7021	19.7767	3.71084	0.212287	0.194403	0.312127	6.33509	32.3481	457432	6.43014e+06	485492	6.39929e+06	498799	6.38466e+06
8	3	503	-142.593	45.4707	23.9917	3.33088	0.179675	0.183967	0.159863	8.09728	30.0469	439817	6.40191e+06	485266	6.40051e+06	509246	6.39977e+06
8	3	504	-152.853	30.612	22.4225	4.03583	0.286089	0.263494	0.416559	4.51868	25.2576	456802	6.41018e+06	486113	6.40135e+06	507583	6.39489e+06
8	3	505	-160.71	33.3395	23.0459	3.67042	0.276188	0.238003	0.523987	4.45138	26.2918	456246	6.41706e+06	486210	6.40245e+06	506923	6.39234e+06
8	3	506	-149.401	31.0722	21.9343	3.65196	0.275487	0.252998	0.432347	3.89625	25.3856	456510	6.41103e+06	486637	6.40343e+06	507905	6.39806e+06
8	3	507	-151.509	33.6503	22.4566	3.84083	0.257969	0.230268	0.476099	3.7918	25.9543	456892	6.4191e+06	487153	6.40438e+06	507347	6.39456e+06
8	3	508	-145.323	33.6279	22.0831	3.69087	0.247603	0.230302	0.384469	3.77377	26.1066	455318	6.41586e+06	487298	6.40546e+06	508299	6.39863e+06
8	3	509	-148.608	33.3159	21.9584	3.73875	0.25557	0.242874	0.327345	5.00727	25.9506	456509	6.41763e+06	487873	6.4064e+06	508546	6.39899e+06
8	3	510	-150.487	38.4081	22.8063	3.76312	0.22449	0.210655	0.302748	5.76968	29.3612	456100	6.42797e+06	488482	6.40732e+06	507710	6.39505e+06
8	3	511	-155.554	38.4271	22.3503	3.77001	0.231934	0.212179	0.338214	6.02303	29.7109	456493	6.42868e+06	489042	6.40826e+06	507973	6.39638e+06
8	3	512	-153.501	34.2368	19.7838	3.84529	0.256885	0.237958	0.359235	5.34319	26.6303	455201	6.41564e+06	488873	6.40944e+06	508330	6.40586e+06
8	3	513	-146.284	33.8945	19.8458	3.20361	0.247279	0.242582	0.27126	5.55173	27.1225	455317	6.4123e+06	489162	6.41047e+06	508978	6.4094e+06
8	3	514	-158.048	43.4277	18.5188	3.98977	0.208518	0.176012	0.499393	4.36519	28.3745	449978	6.42888e+06	489736	6.4114e+06	506690	6.40395e+06
8	3	515	-152.039	37.2692	18.9486	3.92806	0.233736	0.224102	0.278592	6.58908	29.8254	457424	6.43013e+06	490195	6.41238e+06	506856	6.40335e+06
8	3	516	-169.619	49.9136	22.4166	4.01254	0.194705	0.160351	0.404059	7.03593	31.2616	454224	6.44656e+06	491297	6.41313e+06	507946	6.39812e+06
8	3	517	-199.357	56.9188	26.0729	3.46197	0.200677	0.140807	0.56204	8.0896	35.4623	460915	6.46126e+06	492448	6.41388e+06	506893	6.39217e+06
8	3	518	-205.485	50.2575	22.3256	3.49931	0.234261	0.16254	0.615501	7.95734	32.3079	455433	6.44842e+06	492851	6.41487e+06	509472	6.39996e+06
8	3	519	-222.101	49.2499	17.1143	3.63357	0.258384	0.16643	0.736881	7.93836	31.6342	453926	6.44464e+06	493765	6.41569e+06	507610	6.40563e+06
8	3	520	-215.054	39.4716	16.8333	3.61262	0.312162	0.217943	0.687224	7.9245	31.5962	456645	6.42928e+06	494390	6.41773e+06	510488	6.41281e+06
8	3	521	-205.147	70.2857	31.3744	1.58983	0.167232	0.123021	0.33885	14.3972	51.4079	480367	6.4877e+06	494450	6.41884e+06	500736	6.3881e+06
9	3	522	-199.02	66.0267	36.6227	1.86956	0.172703	0.145547	0.240981	18.7878	48.2873	478455	6.48562e+06	495559	6.42185e+06	505047	6.38647e+06
9	3	523	-204.538	54.5532	22.5472	2.58279	0.21482	0.157797	0.441062	10.9816	38.4985	468296	6.47022e+06	495562	6.42297e+06	506831	6.40344e+06
9	3	524	-208.195	41.7626	15.5068	3.28591	0.285629	0.199422	0.693557	7.28558	30.0008	456970	6.43796e+06	496281	6.42386e+06	510877	6.41862e+06
9	3	525	-208.833	46.9848	16.0911	3.20106	0.254661	0.169628	0.788792	6.45219	29.1704	454063	6.44511e+06	496487	6.42492e+06	511016	6.418e+06
9	3	526	-211.795	45.57	14.868	3.17631	0.26629	0.176461	0.795991	6.60701	30.285	453641	6.44008e+06	496946	6.42589e+06	511075	6.42126e+06
9	3	527	-211.525	47.1485	14.976	3.2006	0.257047	0.185276	0.522336	10.0392	29.4384	455863	6.44894e+06	497503	6.42683e+06	510729	6.4198e+06
9	3	528	-200.569	47.0746	14.9744	3.18019	0.244117	0.184537	0.470236	9.81668	28.3349	454082	6.44546e+06	497746	6.42787e+06	511635	6.42228e+06
9	3	529	-164.954	43.7984	28.4893	1.58032	0.215787	0.189689	0.341038	7.55236	37.2965	456610	6.41086e+06	496246	6.4295e+06	522028	6.44162e+06
9	3	530	-160.761	44.5356	26.6871	1.89999	0.206821	0.18082	0.358648	6.51171	36.0066	455212	6.41438e+06	496744	6.43046e+06	521632	6.4401e+06
9	3	531	-163.245	44.8183	18.059	2.66631	0.208692	0.174735	0.452931	5.47039	27.6698	455733	6.44879e+06	497074	6.43148e+06	513731	6.4245e+06
9	3	532	-160.549	38.1133	19.9801	2.45851	0.241352	0.208607	0.450738	5.15435	28.941	459066	6.43661e+06	496972	6.43264e+06	516844	6.43056e+06
9	3	533	-166.971	44.7696	17.549	2.69497	0.213687	0.197043	0.272487	9.87643	27.3536	455728	6.44878e+06	497804	6.43349e+06	514297	6.42749e+06
9	3	534	-169.132	45.523	17.5282	2.58902	0.212871	0.190252	0.299975	9.38425	27.4411	457447	6.45533e+06	497958	6.43456e+06	513556	6.42656e+06
9	3	535	-182.693	46.1255	17.0128	2.68243	0.226935	0.205892	0.282125	12.732	28.9884	459994	6.46e+06	498980	6.43534e+06	513359	6.42625e+06
9	3	536	-168.48	46.251	18.6368	2.66061	0.208713	0.212682	0.199497	13.9235	31.0491	465891	6.46797e+06	499571	6.43627e+06	513142	6.4235e+06
9	3	537	-183.543	46.5362	17.724	2.80506	0.225979	0.209874	0.264277	13.7762	32.1605	466592	6.46884e+06	500584	6.43706e+06	513531	6.42496e+06
9	3	538	-189.093	46.2659	16.9902	2.93988	0.234171	0.211349	0.288228	13.7346	30.26	462578	6.46415e+06	500820	6.43811e+06	514864	6.42855e+06
9	3	539	-201.627	46.6958	16.5096	3.04256	0.247394	0.223163	0.294386	15.8867	32.9863	469180	6.4717e+06	502267	6.43875e+06	513966	6.4271e+06
9	3	540	-162.713	47.4187	19.8916	3.36706	0.196604	0.19236	0.209597	11.6759	29.4766	453629	6.44325e+06	500957	6.44032e+06	520811	6.43908e+06
9	3	541	-183.9	45.9598	26.3272	3.05216	0.229258	0.208961	0.280406	13.0567	35.6115	457126	6.42975e+06	501632	6.44122e+06	527127	6.44778e+06
9	3	542	-166.073	45.1206	19.1255	3.46563	0.210885	0.210975	0.210651	12.5315	29.0208	460976	6.46134e+06	501866	6.44226e+06	519199	6.43418e+06
9	3	543	-167.376	45.6386	17.6438	3.75435	0.210126	0.206821	0.218992	12.395	28.6704	458992	6.45762e+06	502306	6.44324e+06	519051	6.43768e+06
9	3	544	-168.949	45.0914	17.666	3.77392	0.214676	0.212611	0.219912	12.7532	28.9915	460922	6.46128e+06	502675	6.44425e+06	519033	6.43757e+06
9	3	545	-164.843	46.4351	19.6889	4.12574	0.203397	0.202753	0.20514	12.5246	28.7021	457385	6.4552e+06	502762	6.44534e+06	522002	6.44116e+06
9	3	546	-158.076	48.1442	24.7371	3.6955	0.188123	0.190431	0.181203	12.0394	29.2159	454552	6.44691e+06	502694	6.44649e+06	527430	6.44628e+06
9	3	547	-164.839	44.6308	19.5676	4.168	0.211615	0.18522	0.342075	7.5102	28.53	461085	6.46145e+06	503436	6.44737e+06	522004	6.4412e+06
9	3	548	-162.621	43.7714	19.8685	3.93657	0.212867	0.189451	0.326478	7.4798	28.3118	462579	6.46413e+06	503459	6.44849e+06	522014	6.44139e+06
9	3	549	-160.568	46.616	23.6353	3.8876	0.197353	0.173774	0.329672	7.05046	28.6788	457242	6.454e+06	503645	6.44955e+06	527173	6.4473e+06
9	3	550	-164.497	43.8501	23.1642	4.00578	0.214935	0.188302	0.347474	7.3371	27.963	461616	6.46178e+06	504006	6.45056e+06	526399	6.44463e+06
9	3	551	-168.779	42.4084	23.0976	4.01748	0.228027	0.203278	0.325528	8.58541	27.7953	464841	6.46683e+06	504493	6.45179e+06	526089	6.4436e+06
9	3	552	-196.463	37.3907	20.3545	4.00388	0.301048	0.22989	0.585432	7.48307	28.0195	477115	6.47668e+06	505762	6.45265e+06	521357	6.43957e+06
9	3	553	-169.176	42.2121	21.6424	4.9749	0.229627	0.184886	0.560753	5.02447	26.5971	464582	6.46654e+06	505702	6.457e+06	526784	6.45211e+06
9	3	554	-168.862	46.1285	19.6949	4.98733	0.209741	0.167427	0.552929	5.063	28.8611	459793	6.45928e+06	505906	6.45805e+06	525594	6.45752e+06
9	3	555	-162.698	45.9399	17.034	2.39192	0.202915	0.166147	0.536731	4.55788	28.5888	459758	6.45908e+06	505698	6.45917e+06	522732	6.4592e+06
9	3	556	-160.523	47.5986	20.0178	1.56095	0.193225	0.158899	0.536287	4.32924	28.847	458271	6.45687e+06	505750	6.46024e+06	525717	6.46166e+06
9	3	557	-160.886	41.8814	16.7266	2.0166	0.220099	0.181784	0.577096	4.05917	25.7674	464373	6.46631e+06	505954	6.46129e+06	522560	6.45929e+06
9	3	558	-167.474	38.2249	19.6372	2.11317	0.251027	0.197961	0.778549	3.49353	25.079	469008	6.471e+06	506235	6.46233e+06	525360	6.45787e+06
9	3	559	-167.638	34.9124	20.048	2.13527	0.275114	0.22212	0.689477	3.95858	23.5716	473572	6.47452e+06	506646	6.46334e+06	525638	6.45692e+06
9	3	560	-166.339	38.3004	18.899	1.43442	0.248834	0.198509	0.724426	3.66478	23.6529	468937	6.47129e+06	506618	6.46443e+06	525211	6.46104e+06
9	3	561	-227.513	50.0175	26.9018	2.72409	0.260618	0.174858	0.575836	10.6972	32.0318	487314	6.50961e+06	509842	6.46495e+06	521958	6.44093e+06
9	3	562	-233.709	51.9716	28.7234	1.83422	0.257649	0.18089	0.466603	13.9624	34.7241	490958	6.51415e+06	510377	6.46594e+06	521109	6.4393e+06
9	3	563	-223.305	40.2212	18.322	2.31962	0.318099	0.207458	0.835982	7.07974	26.0444	470193	6.47204e+06	510106	6.46708e+06	528288	6.46481e+06
9	3	564	-224.576	43.6449	19.5747	2.1142	0.294815	0.189139	0.821477	7.29342	27.1259	466782	6.46895e+06	510418	6.4681e+06	529989	6.46773e+06
9	3	565	-234.239	37.083	17.2214	2.41876	0.361911	0.230901	0.895776	7.30638	23.3511	475930	6.48163e+06	510838	6.46912e+06	527049	6.4633e+06
9	3	566	-232.733	36.6622	17.3897	2.36969	0.363711	0.235073	0.871144	7.41396	22.5062	477205	6.48378e+06	511232	6.47013e+06	527371	6.46366e+06
9	3	567	-256.593	40.8449	14.619	2.44223	0.359934	0.230538	0.710057	11.0214	26.785	484689	6.50061e+06	512772	6.47095e+06	522823	6.46033e+06
9	3	568	-215.564	52.3297	27.1825	1.26966	0.23602	0.152249	0.763593	7.17018	31.0894	459899	6.4597e+06	510664	6.4724e+06	537034	6.479e+06
9	3	569	-237.079	54.1027	25.8314	1.69187	0.251069	0.151403	0.771803	8.69099	32.7335	459846	6.45948e+06	512176	6.47322e+06	537161	6.47978e+06
9	3	570	-237.655	36.5916	18.4534	1.8073	0.372119	0.24511	0.789203	8.54116	23.8156	483999	6.49758e+06	512228	6.4743e+06	526464	6.46255e+06
9	3	571	-233.468	37.1611	22.5496	2.16947	0.359962	0.23065	0.884202	7.3521	22.3626	475537	6.47979e+06	512432	6.47534e+06	534819	6.47265e+06
9	3	572	-244.005	35.0642	20.9111	2.18001	0.398704	0.255495	0.87129	8.15393	22.3227	479375	6.48674e+06	512866	6.47635e+06	532839	6.47016e+06
9	3	573	-241.518	35.7324	21.9168	2.18663	0.38726	0.246093	0.893242	7.79394	21.8563	478194	6.48525e+06	513273	6.47845e+06	534789	6.47428e+06
9	3	574	-244.373	41.5379	21.7715	0.975858	0.337075	0.256991	0.48199	14.7843	26.5258	491467	6.51462e+06	513613	6.47948e+06	525221	6.46106e+06
9	3	575	-239.903	34.5493	21.9226	2.19267	0.397844	0.256602	0.885788	7.75513	21.7079	479782	6.4872e+06	513684	6.48055e+06	535197	6.47632e+06
9	3	576	-234.54	36.9892	23.2612	2.05719	0.363294	0.234401	0.857002	7.6571	21.636	476730	6.483e+06	513693	6.48163e+06	536939	6.48077e+06
9	3	577	-228.114	37.2214	19.9722	1.97754	0.351138	0.230937	0.831487	7.44936	21.8456	476452	6.48252e+06	513673	6.48272e+06	533645	6.48282e+06
9	3	578	-226.452	38.0192	19.6622	1.66718	0.341264	0.221504	0.873833	6.97934	21.3933	475613	6.4812e+06	513541	6.48382e+06	533156	6.48518e+06
9	3	579	-244.385	34.2692	23.0724	2.0561	0.408588	0.274472	0.772959	9.2195	21.5028	484940	6.50153e+06	514787	6.48469e+06	534882	6.47336e+06
9	3	580	-243.215	35.6521	24.1455	1.82105	0.390859	0.282014	0.626259	11.2724	21.4699	485901	6.50647e+06	514918	6.48575e+06	534570	6.47172e+06
9	3	581	-242.335	33.1227	18.4145	2.44311	0.419186	0.27905	0.826124	8.48396	21.7186	481961	6.48961e+06	514967	6.48683e+06	533316	6.48529e+06
9	3	582	-239.949	34.4869	18.132	2.49529	0.398641	0.264845	0.805966	8.52659	20.7822	481120	6.49294e+06	515232	6.48787e+06	533167	6.4852e+06
9	3	583	-251.207	35.0138	22.9328	2.51145	0.411063	0.278707	0.726671	10.3447	21.0194	485935	6.50654e+06	516123	6.4888e+06	535895	6.47718e+06
9	3	584	-247.396	34.7744	23.3155	2.55257	0.407614	0.272175	0.767228	9.51325	20.5235	484929	6.50507e+06	516204	6.48987e+06	537173	6.47967e+06
9	3	585	-252.55	34.2374	19.8736	2.64203	0.42263	0.29298	0.705109	10.7702	21.1302	482575	6.49596e+06	516438	6.49091e+06	536094	6.48798e+06
10	2	586	-119.537	24.5897	27.2677	1.25911	0.278529	0.281736	0.1426	0.18586	12.7381	485584	6.49887e+06	510131	6.49743e+06	537352	6.49583e+06
10	2	587	-126.463	25.4737	25.8147	1.06369	0.284439	0.277446	0.534658	0.692569	11.7727	484878	6.50112e+06	510347	6.50064e+06	536157	6.50016e+06
10	2	588	-136.025	25.4348	26.7614	1.19037	0.306415	0.293147	0.463499	1.98096	11.3178	486975	6.5088e+06	511356	6.50155e+06	537009	6.49393e+06
10	2	589	-146.835	23.2382	26.9773	1.05279	0.362031	0.322549	0.799795	1.92229	10.7301	490872	6.51407e+06	512127	6.50467e+06	536802	6.49377e+06
10	2	590	-135.99	25.6517	22.9778	1.05525	0.303745	0.280191	0.822888	1.11326	10.4281	485793	6.50637e+06	511440	6.50588e+06	534414	6.50543e+06
10	2	591	-114.815	35.7801	30.7124	0.640037	0.183856	0.18902	0.500022	-0.594153	15.2015	480455	6.48777e+06	510558	6.50711e+06	536398	6.52371e+06
10	2	592	-130.222	21.2348	25.1209	1.14638	0.351361	0.336999	0.703135	0.832919	10.6773	492392	6.51551e+06	512220	6.50791e+06	535675	6.49891e+06
10	2	593	-230.979	31.3623	14.8496	5.90635	0.421968	0.295301	0.786958	8.07947	17.5349	487971	6.51075e+06	519332	6.51101e+06	534181	6.51113e+06
10	2	594	-240.597	28.0797	14.2965	6.4236	0.490919	0.347126	0.835148	8.27307	17.1608	491825	6.51493e+06	519753	6.51202e+06	533973	6.51053e+06
10	2	595	-231.033	27.4707	14.1208	5.87467	0.481856	0.358259	0.768323	8.2795	16.8591	493625	6.52168e+06	520362	6.51537e+06	534105	6.51213e+06
10	2	596	-203.323	29.6204	13.6139	6.22031	0.39329	0.329122	0.546831	8.73019	17.2578	492035	6.52339e+06	520816	6.51639e+06	534044	6.51317e+06
10	2	597	-212.291	29.6771	13.6125	5.94901	0.40985	0.332317	0.588317	8.98783	16.6595	491975	6.52429e+06	520856	6.51746e+06	534103	6.51433e+06
10	2	598	-207.231	26.2292	15.0593	4.47731	0.452671	0.390989	0.578141	8.64463	16.7095	494482	6.51864e+06	520692	6.51964e+06	535740	6.52021e+06
10	2	599	-189.046	26.8531	15.0672	4.28736	0.403356	0.378059	0.456436	8.66706	16.7536	493927	6.52001e+06	520771	6.52071e+06	535833	6.5211e+06
10	2	600	-191.073	28.7437	14.868	4.75808	0.380866	0.344517	0.463418	8.78709	16.3149	492890	6.52724e+06	521102	6.52174e+06	535694	6.51889e+06
10	2	601	-212.599	27.1642	14.5249	2.76365	0.448414	0.365132	0.636568	8.33427	16.0945	493891	6.52019e+06	520795	6.52394e+06	535180	6.52595e+06
11	0	602	-143.739	22.1153	19.4479	1.13131	0.372391	0.343086	0.655353	2.07536	11.2798	493438	6.52213e+06	515245	6.52581e+06	534421	6.52905e+06
11	0	603	-162.92	21.2371	20.6429	1.14828	0.439535	0.381238	0.76779	3.20267	11.0094	497472	6.53825e+06	516990	6.52988e+06	535961	6.52174e+06
11	0	604	-128.359	20.6863	20.3606	1.1385	0.355518	0.346046	0.58564	0.81779	8.84862	494244	6.52963e+06	514866	6.53126e+06	535164	6.53286e+06
11	0	605	-122.583	40.5092	41.3229	0.813227	0.17338	0.172873	0.200711	0.73743	13.9264	484884	6.50495e+06	514708	6.53236e+06	545131	6.56032e+06
11	0	606	-154.746	26.7121	25.599	0.950656	0.331916	0.295371	0.579577	3.43476	15.2669	499045	6.55296e+06	516934	6.53312e+06	534077	6.51411e+06
11	0	607	-152.049	24.7413	25.4383	0.958357	0.35211	0.307054	0.781448	2.34969	13.2621	498233	6.551e+06	516460	6.53427e+06	535201	6.51707e+06
11	0	608	-143.087	24.8928	31.8909	1.14219	0.32934	0.302204	0.617571	2.14186	10.3522	492736	6.5268e+06	516095	6.5354e+06	546021	6.54642e+06
11	0	609	-133.909	18.8361	23.3629	1.29503	0.40732	0.39163	0.622451	1.28029	9.2342	497501	6.53467e+06	516252	6.53646e+06	539510	6.53867e+06
11	0	610	-146.586	21.4598	18.4934	1.24606	0.391364	0.348965	0.866642	1.7575	10.8855	496727	6.5449e+06	516854	6.53745e+06	534198	6.53103e+06
11	0	611	-142.13	19.8652	21.5013	1.27007	0.409928	0.375447	0.816584	1.55267	10.1032	497185	6.54242e+06	516669	6.53855e+06	537758	6.53436e+06
11	0	612	-154.24	21.6048	19.0768	1.25547	0.409037	0.353878	0.901491	2.17599	11.1506	496920	6.54606e+06	517510	6.53951e+06	535690	6.53373e+06
11	0	613	-131.838	19.185	27.5257	1.33749	0.393726	0.379039	0.6484	1.04602	9.89135	497456	6.54045e+06	516639	6.54072e+06	544162	6.5411e+06
11	0	614	-156.326	22.1866	19.0208	1.28474	0.403697	0.359075	0.684817	3.03911	12.8099	498168	6.55061e+06	518418	6.54154e+06	535779	6.53377e+06
11	0	615	-155.602	22.6819	22.2181	1.15848	0.393054	0.3526	0.640891	3.18273	12.9286	502272	6.55847e+06	518491	6.54261e+06	534379	6.52708e+06
11	0	616	-127.184	27.7421	34.9871	0.980924	0.262672	0.256891	0.420887	0.977981	11.8581	493651	6.52872e+06	516860	6.54392e+06	546131	6.56309e+06
11	0	617	-135.996	22.1207	31.5837	1.04501	0.352244	0.328362	0.775201	1.1822	11.4664	497529	6.53509e+06	517337	6.54493e+06	545620	6.55899e+06
11	0	618	-160.78	20.728	21.4406	1.07593	0.444414	0.376694	0.943545	2.47608	13.6133	504075	6.56045e+06	518746	6.54581e+06	533922	6.53067e+06
11	0	619	-138.661	20.1449	22.8899	1.27857	0.39437	0.364149	0.845685	1.26417	10.6551	499405	6.55437e+06	518143	6.54698e+06	539436	6.53857e+06
11	0	620	-167.277	20.766	25.4933	1.14037	0.461527	0.398018	0.775674	3.49197	10.3789	500245	6.55579e+06	519832	6.54889e+06	543878	6.54043e+06
11	0	621	-141.388	20.0787	27.7583	1.27199	0.403453	0.377272	0.660689	1.85473	10.1972	498284	6.55134e+06	518329	6.55019e+06	546041	6.54858e+06
11	0	622	-149.404	23.9728	31.1866	1.16453	0.357075	0.317801	0.720397	2.33845	13.1236	497447	6.53991e+06	518582	6.55123e+06	546076	6.56595e+06
11	0	623	-137.97	21.6044	28.5455	1.22131	0.365898	0.350286	0.520943	1.97639	10.5077	496974	6.54615e+06	517643	6.55244e+06	544953	6.56075e+06
11	0	624	-122.722	23.0839	32.1415	1.19809	0.304602	0.328072	0.0733362	2.1268	11.8911	497008	6.5426e+06	517319	6.55357e+06	545600	6.56884e+06
11	0	625	-144.907	14.9745	28.7573	1.19503	0.554429	0.529189	0.719844	1.98238	9.99571	505572	6.56159e+06	518731	6.55444e+06	544002	6.54072e+06
11	0	626	-126.644	14.0834	28.9574	1.2902	0.515213	0.530481	0.338986	1.12292	8.99597	505406	6.5614e+06	518237	6.55559e+06	544619	6.54366e+06
11	0	627	-131.446	19.8744	27.6536	1.34209	0.378937	0.365903	0.604812	1.08424	9.43675	498809	6.55263e+06	518270	6.55667e+06	545348	6.56228e+06
11	0	628	-155.372	19.2884	29.6576	1.19865	0.46152	0.4041	0.891043	2.2743	10.4298	503729	6.56853e+06	519595	6.55756e+06	543991	6.54069e+06
11	0	629	-130.011	13.5217	26.3839	1.55842	0.550879	0.548785	0.577276	0.993562	9.09578	505789	6.5623e+06	518836	6.55875e+06	544293	6.55181e+06
11	0	630	-117.457	22.5574	30.8072	1.17467	0.298338	0.306748	1.01533	0.143471	10.546	498479	6.54919e+06	518335	6.5599e+06	545453	6.57451e+06
11	0	631	-180.027	41.3001	30.9133	0.917894	0.249751	0.192342	0.619217	5.55406	17.3632	500461	6.59589e+06	521739	6.56049e+06	537666	6.534e+06
11	0	632	-166.199	25.1253	31.4597	0.970263	0.378996	0.330005	0.616858	4.29095	15.8859	507869	6.58298e+06	521156	6.56165e+06	537792	6.53495e+06
11	0	633	-165.597	19.7432	25.0965	2.54901	0.480559	0.40908	0.889659	2.93627	11.3224	502012	6.55805e+06	521195	6.56273e+06	545578	6.56866e+06
11	0	634	-153.632	15.3378	25.0304	2.2464	0.57389	0.536439	0.76426	2.52124	9.8848	505657	6.56169e+06	520842	6.56385e+06	545621	6.56739e+06
11	0	635	-150.152	15.387	25.5502	1.55025	0.559094	0.52655	0.741482	2.32974	9.86903	505672	6.56173e+06	520719	6.56495e+06	545703	6.5703e+06
11	0	636	-122.702	23.041	25.1195	1.23566	0.30512	0.306371	0.25828	0.599472	11.0299	499555	6.55463e+06	519474	6.56621e+06	541189	6.57883e+06
11	0	637	-132.407	15.0772	23.27	1.33063	0.503155	0.497271	0.568186	1.25105	9.55505	505732	6.56202e+06	519880	6.56723e+06	541718	6.57527e+06
11	0	638	-154.726	16.0706	25.7742	1.53095	0.551622	0.532804	0.628302	3.16659	10.8859	508637	6.57862e+06	521615	6.56914e+06	542430	6.55394e+06
11	0	639	-144.214	15.6123	25.9014	1.61549	0.52924	0.511668	0.637782	2.17522	9.26769	506704	6.57623e+06	521140	6.57029e+06	545090	6.56042e+06
11	0	640	-149.647	17.0035	24.6115	2.81099	0.504244	0.477828	0.649601	2.61477	9.72413	505486	6.57493e+06	522082	6.57123e+06	546103	6.56587e+06
11	0	641	-155.543	28.1043	27.0271	1.77219	0.3171	0.280781	0.562934	3.6175	11.9818	500448	6.58946e+06	522648	6.57223e+06	543998	6.55566e+06
11	0	642	-146.749	17.4756	19.8355	4.1302	0.481124	0.46063	0.601094	2.54963	9.35404	504491	6.57208e+06	521916	6.57341e+06	541694	6.57492e+06
11	0	643	-152.81	16.8998	23.0275	5.82257	0.518061	0.494739	0.625987	3.00295	10.0807	505915	6.57542e+06	522782	6.57437e+06	545765	6.57293e+06
11	0	644	-151.788	14.0982	23.9383	5.08674	0.61685	0.610807	0.640781	2.84221	9.06453	508667	6.57869e+06	522400	6.5755e+06	545719	6.57009e+06
11	0	645	-153.939	15.0593	18.7926	4.74649	0.585667	0.576636	0.619998	3.13625	9.52302	507953	6.57772e+06	522958	6.57645e+06	541684	6.57487e+06
11	0	646	-149.391	25.7186	25.4872	5.5257	0.332809	0.309007	0.485488	3.46858	11.6736	500474	6.58912e+06	523391	6.57745e+06	546102	6.56588e+06
11	0	647	-156.035	14.3462	18.4583	3.94058	0.62315	0.590121	0.765901	2.69556	9.91074	508788	6.57957e+06	523102	6.57861e+06	541520	6.57739e+06
11	0	648	-143.677	14.3078	14.7528	5.52934	0.575338	0.557422	0.687292	1.97372	10.1329	508636	6.58024e+06	522839	6.58197e+06	537483	6.58376e+06
11	0	649	-138.789	16.0259	14.0183	6.10819	0.496187	0.49358	0.513508	2.09638	10.0886	507208	6.58344e+06	523227	6.58298e+06	537240	6.58258e+06
11	0	650	-132.857	21.765	14.2556	6.00018	0.349738	0.34205	0.442595	1.66435	10.0538	501308	6.58582e+06	523007	6.58413e+06	537219	6.58302e+06
11	0	651	-136.066	20.5456	18.7146	5.6069	0.379443	0.360981	0.613981	1.49921	10.1379	502594	6.58414e+06	523112	6.5852e+06	541802	6.58617e+06
11	0	652	-133.042	22.6494	14.6804	5.69126	0.33655	0.319451	0.663172	1.12671	9.90338	500583	6.58798e+06	523169	6.58629e+06	537808	6.58519e+06
11	0	653	-150.248	30.1977	21.1217	4.5316	0.285071	0.245685	0.783142	2.21282	11.8292	499778	6.60451e+06	524439	6.58708e+06	541689	6.57489e+06
11	0	654	-151.866	31.1312	28.4669	3.26202	0.279501	0.246164	0.570403	3.20075	13.4125	502212	6.60944e+06	524858	6.58808e+06	545567	6.56855e+06
11	0	655	-172.38	37.8143	29.9899	5.31911	0.261187	0.210768	0.577874	5.19329	15.4391	501728	6.61743e+06	526431	6.5888e+06	546022	6.56609e+06
11	0	656	-203.615	49.6674	37.4434	2.9965	0.234887	0.17232	0.490447	9.76797	21.0192	507483	6.63474e+06	528022	6.58952e+06	543506	6.55542e+06
11	0	657	-199.917	37.823	19.0311	7.76413	0.302839	0.219319	0.707256	6.47384	16.4536	501761	6.61758e+06	528232	6.59056e+06	541551	6.57697e+06
11	0	658	-196.651	27.7392	13.1888	8.03106	0.406178	0.303978	0.857534	5.12099	13.3494	500311	6.59204e+06	528048	6.59171e+06	541236	6.59155e+06
11	0	659	-200.415	28.0145	13.4627	8.4835	0.409886	0.30624	0.82812	5.56334	13.7155	500799	6.59664e+06	528534	6.59269e+06	541863	6.59079e+06
11	0	660	-212.621	33.0662	14.1718	6.96971	0.368416	0.262253	0.774742	6.84935	15.0015	501763	6.6119e+06	529307	6.5936e+06	541111	6.58576e+06
11	0	661	-196.964	27.9269	10.8177	9.52278	0.404092	0.299663	0.884876	4.98305	13.7114	500798	6.5966e+06	528670	6.59485e+06	539466	6.59418e+06
11	0	662	-153.34	30.1652	26.8865	0.658708	0.291252	0.270279	0.404125	4.72685	19.291	505424	6.57469e+06	526216	6.59654e+06	544749	6.61602e+06
11	0	663	-148.218	24.2301	25.9008	0.665971	0.35048	0.323532	0.542714	2.97895	17.9444	508439	6.58095e+06	525935	6.59771e+06	544639	6.61563e+06
11	0	664	-142.794	25.4399	13.2674	5.72138	0.321598	0.293078	0.6594	1.98052	10.7475	500678	6.59622e+06	525988	6.59879e+06	539187	6.60014e+06
11	0	665	-141.367	27.2994	13.8852	5.47062	0.296697	0.271223	0.627906	1.94964	9.73309	499094	6.60313e+06	526194	6.59984e+06	539978	6.59817e+06
12	4	666	-212.386	30.1004	8.79005	11.5506	0.404268	0.287204	0.859071	6.16126	13.5345	502113	6.61057e+06	530966	6.60199e+06	539391	6.59949e+06
12	4	667	-209.253	31.5366	9.0401	11.7479	0.380166	0.268714	0.859385	5.95012	14.1305	499263	6.60367e+06	530795	6.60313e+06	539834	6.60298e+06
12	4	668	-188.892	32.1439	12.1473	7.66552	0.336691	0.259963	0.692936	5.69607	15.5859	500298	6.592e+06	529941	6.60444e+06	541143	6.60913e+06
12	4	669	-197.023	30.9815	10.8326	9.30903	0.36436	0.265651	0.865246	5.09998	13.8829	500102	6.59828e+06	530240	6.60546e+06	540778	6.60797e+06
12	4	670	-180.236	29.1967	10.0671	10.3178	0.353691	0.280725	0.733495	4.70497	10.6438	500840	6.60765e+06	530018	6.60661e+06	540079	6.60626e+06
12	4	671	-195.648	31.2983	9.69185	10.7668	0.358157	0.273343	0.705294	6.14512	12.829	503171	6.62133e+06	531213	6.60743e+06	539897	6.60312e+06
12	4	672	-199.429	31.2479	9.96035	10.0883	0.365665	0.269861	0.788651	5.77015	12.4088	503310	6.62298e+06	531034	6.60857e+06	539871	6.60397e+06
12	4	673	-194.715	29.3711	10.1232	10.0658	0.379837	0.287847	0.780372	5.48534	11.821	501916	6.61131e+06	531281	6.61071e+06	541402	6.6105e+06
12	4	674	-190.563	29.9052	10.4739	9.01967	0.365096	0.275993	0.809583	4.99353	11.7311	501423	6.61387e+06	531257	6.61181e+06	541707	6.61109e+06
12	4	675	-182.55	29.8371	11.5298	8.07213	0.350544	0.272206	0.782637	4.57895	11.6343	501473	6.61326e+06	531308	6.6129e+06	542837	6.61275e+06
12	4	676	-189.118	31.1123	9.84101	10.5722	0.348273	0.260746	0.834739	4.74389	12.0677	503530	6.62609e+06	532113	6.6138e+06	541155	6.60991e+06
12	4	677	-178.226	29.7243	10.5897	9.11581	0.343541	0.268292	0.814127	4.09752	11.4941	503373	6.62328e+06	531907	6.61495e+06	542073	6.61198e+06
12	4	678	-170.148	30.4976	12.8424	4.89757	0.319654	0.26122	0.68784	4.17705	11.9864	501537	6.61419e+06	531979	6.61603e+06	544798	6.61681e+06
12	4	679	-164.736	29.3051	12.4682	5.54984	0.322079	0.269227	0.680322	3.76739	11.2006	503196	6.6212e+06	532210	6.61707e+06	544554	6.61532e+06
12	4	680	-170.31	29.466	12.9726	4.62928	0.331159	0.262368	0.883961	3.26071	10.9321	502634	6.61948e+06	532073	6.61821e+06	545033	6.61764e+06
12	4	681	-158.619	30.3833	12.3236	5.8021	0.299116	0.253098	0.687528	3.21821	10.9711	503712	6.62783e+06	532822	6.61912e+06	544630	6.61559e+06
12	4	682	-154.642	28.9878	12.6373	5.29601	0.305655	0.266045	0.631164	3.14462	10.5709	505960	6.63097e+06	532875	6.62021e+06	544608	6.61552e+06
12	4	683	-152.83	29.4227	12.7785	4.60168	0.297607	0.268196	0.496712	3.7868	9.8212	505474	6.63044e+06	533720	6.6222e+06	545988	6.61863e+06
12	4	684	-152.996	28.8912	13.9305	3.79729	0.303413	0.266306	0.615116	3.07337	9.98411	505813	6.63082e+06	533709	6.62331e+06	547159	6.61968e+06
12	4	685	-154.693	30.4807	15.4688	3.63973	0.29078	0.245802	0.792166	2.5091	9.70164	503279	6.62488e+06	533756	6.62439e+06	549222	6.62414e+06
12	4	686	-141.591	30.4066	20.7726	3.49909	0.266802	0.241535	0.637348	1.94093	9.40475	503265	6.62492e+06	533666	6.62551e+06	554435	6.62591e+06
12	4	687	-141.041	30.1008	20.8375	4.54491	0.268465	0.246209	0.55414	2.17553	10.0866	503661	6.62667e+06	533761	6.62659e+06	554599	6.62653e+06
12	4	688	-136.018	27.624	15.2089	3.96467	0.282117	0.270244	0.420517	2.18245	10.2654	507434	6.63443e+06	534196	6.62758e+06	548930	6.62381e+06
12	4	689	-123.21	27.402	15.8715	4.93504	0.257623	0.267341	0.109215	1.68407	9.83198	507446	6.63452e+06	534217	6.62868e+06	549723	6.62529e+06
12	4	690	-137.906	28.1746	20.7217	3.91955	0.280442	0.259238	0.620664	1.65286	10.0791	506175	6.63124e+06	534310	6.62975e+06	555003	6.62866e+06
12	4	691	-121.046	27.1864	20.3491	4.53478	0.255105	0.255641	0.205629	0.291491	9.94914	508141	6.63666e+06	534681	6.63076e+06	554545	6.62635e+06
12	4	692	-116.221	26.987	20.637	4.04358	0.246746	0.253846	2.20705	-0.0980553	9.93081	508130	6.63664e+06	534689	6.63186e+06	555000	6.6282e+06
12	4	693	-120.645	26.6212	20.3191	4.32633	0.259657	0.258773	0.713491	0.0517658	9.84757	509075	6.63835e+06	535122	6.63285e+06	555003	6.62866e+06
12	4	694	-121.303	26.0848	20.5007	4.22149	0.266444	0.265387	0.420674	0.177522	9.75353	511014	6.64302e+06	535444	6.63387e+06	554644	6.62669e+06
12	4	695	-121.537	26.1916	20.3558	4.72601	0.265867	0.264327	0.487906	0.180461	10.1247	511287	6.64392e+06	535865	6.63487e+06	554967	6.62784e+06
12	4	696	-118.326	25.7766	17.4846	6.66261	0.26301	0.265152	0.62461	-0.153597	9.51785	510220	6.6396e+06	535744	6.636e+06	553057	6.63356e+06
12	4	697	-111.117	27.7997	17.1945	4.7364	0.229014	0.24294	1.01508	-0.501322	9.56821	507990	6.63618e+06	535766	6.63731e+06	552947	6.63801e+06
12	4	698	-113.818	25.6264	17.1535	6.29927	0.254474	0.266845	2.5412	-0.139289	9.36954	511250	6.64388e+06	536255	6.63828e+06	552992	6.63452e+06
12	4	699	-108.937	25.1171	15.5269	4.99012	0.2485	0.266616	0.944931	-0.670722	8.91889	511515	6.64421e+06	536181	6.63947e+06	551428	6.63654e+06
12	4	700	-117.843	26.5397	17.2603	6.88064	0.254405	0.25903	32.4207	-0.00339679	10.6048	513752	6.65251e+06	537251	6.64017e+06	552534	6.63215e+06
12	4	701	-119.45	26.6106	17.9871	6.11344	0.257188	0.258348	12.3989	-0.00250141	10.2738	515281	6.65608e+06	537391	6.64127e+06	552336	6.63126e+06
12	4	702	-109.209	26.2909	15.8138	6.11798	0.237998	0.255123	0.938571	-0.658686	10.0212	511027	6.64314e+06	537309	6.64247e+06	553118	6.64207e+06
12	4	703	-126.069	26.0378	15.5452	6.03351	0.277411	0.268079	0.88996	0.390683	11.225	514594	6.65426e+06	538625	6.64423e+06	552972	6.63825e+06
12	4	704	-97.7916	23.3567	21.2883	5.72521	0.239889	0.283694	1.44777	-0.87871	9.30598	514128	6.64692e+06	537462	6.64588e+06	558729	6.64494e+06
12	4	705	-97.0671	32.6313	25.5416	2.55255	0.170435	0.206187	1.83842	-0.714476	11.0091	507423	6.63419e+06	537407	6.64707e+06	560877	6.65714e+06
12	4	706	-120.971	38.7016	27.0886	3.02833	0.17909	0.182262	0.0568239	0.978664	13.7572	521590	6.68129e+06	539879	6.64718e+06	552680	6.62331e+06
12	4	707	-110.239	34.652	26.4125	3.40908	0.182274	0.195034	0.931229	-0.600542	11.8926	519424	6.67679e+06	539457	6.64852e+06	554726	6.62697e+06
12	4	708	-106.395	25.6304	26.1054	5.19487	0.237841	0.260677	1.04619	-0.745018	11.4032	514134	6.64689e+06	539619	6.64961e+06	565577	6.65238e+06
12	4	709	-123.838	27.0994	15.6768	6.98685	0.261826	0.256607	0.719016	0.305794	11.3718	520035	6.66755e+06	540882	6.65024e+06	552942	6.64022e+06
12	4	710	-98.058	25.116	26.2982	5.44951	0.223693	0.261216	1.04325	-1.20493	9.47816	515118	6.65556e+06	539950	6.65179e+06	565951	6.64785e+06
12	4	711	-102.535	26.1579	24.8736	5.87338	0.22459	0.256362	1.51279	-0.661307	10.8225	515317	6.6562e+06	541201	6.65242e+06	565814	6.64883e+06
12	4	712	-103.07	32.9834	17.0902	6.45284	0.179043	0.204104	1.38033	-0.702609	11.5209	520236	6.67834e+06	541756	6.65335e+06	552907	6.64039e+06
12	4	713	-104.043	24.5526	24.8992	5.95202	0.242793	0.271598	1.19936	-0.762172	10.2107	519032	6.66319e+06	541965	6.65442e+06	565221	6.64552e+06
12	4	714	-111.953	34.2099	17.9589	7.23594	0.187502	0.200307	4.0108	-0.114764	11.8978	521408	6.68095e+06	543577	6.65489e+06	555215	6.64122e+06
12	4	715	-99.8497	35.1436	17.9189	7.11883	0.162788	0.194615	6.21528	-0.185027	14.1173	523392	6.68436e+06	543988	6.65588e+06	554489	6.64136e+06
12	4	716	-107.673	29.5808	20.6744	5.04172	0.208553	0.226701	0.944775	-0.747528	11.4665	514066	6.6516e+06	543067	6.65743e+06	563337	6.6615e+06
12	4	717	-98.8638	30.1461	19.2987	5.01519	0.187901	0.221601	1.37556	-0.880211	11.6339	514093	6.65117e+06	543339	6.65848e+06	562062	6.66315e+06
12	4	718	-104.919	26.0847	23.7222	6.22049	0.230457	0.25984	2.29913	-0.375622	9.9867	520043	6.66987e+06	543927	6.65939e+06	565647	6.64985e+06
12	4	719	-118.502	30.0371	25.4312	6.20784	0.226042	0.228503	1.64828	-0.0520411	10.4125	519421	6.67677e+06	544531	6.66029e+06	565791	6.64633e+06
12	4	720	-115.125	27.5392	23.0784	6.25661	0.239518	0.246374	0.760394	-0.367334	8.98549	520014	6.67321e+06	544850	6.66132e+06	565664	6.65134e+06
12	4	721	-109.376	30.1933	23.402	6.4995	0.207554	0.223772	1.14403	-0.532026	11.463	519882	6.67786e+06	545656	6.66213e+06	565633	6.64994e+06
12	4	722	-105.585	27.0705	16.5949	6.66165	0.223474	0.247121	1.09854	-0.751737	10.5441	519958	6.67217e+06	545549	6.66334e+06	561236	6.65793e+06
12	4	723	-96.1551	25.8731	16.7629	6.31315	0.212934	0.257058	1.56358	-0.873555	10.1115	520395	6.66815e+06	545983	6.66432e+06	562561	6.66183e+06
12	4	724	-99.5565	29.9246	17.1051	6.78088	0.190617	0.224699	1.73749	-0.67394	10.8456	521909	6.68182e+06	546761	6.66515e+06	560966	6.65562e+06
12	4	725	-93.5446	29.2006	18.3366	6.57884	0.183547	0.228308	1.65744	-0.914277	10.1835	520075	6.67816e+06	547176	6.66729e+06	564194	6.66046e+06
12	4	726	-96.8122	29.5628	15.1296	6.48259	0.187632	0.227211	1.90415	-0.697464	10.4096	519531	6.6771e+06	547728	6.66822e+06	562159	6.66367e+06
12	4	727	-104.153	29.167	15.1472	6.6052	0.204597	0.230696	1.42715	-0.636084	11.3182	523140	6.68412e+06	548723	6.67012e+06	562009	6.66284e+06
12	4	728	-105.311	28.9368	15.2327	7.89688	0.208517	0.231391	1.08336	-0.776787	11.17	522530	6.6828e+06	549018	6.67115e+06	562962	6.66502e+06
12	4	729	-107.591	29.257	13.3763	7.93798	0.210701	0.229578	1.02847	-0.691218	11.1719	521627	6.68136e+06	549397	6.67215e+06	562094	6.66794e+06
12	4	730	-112.811	30.529	15.0973	7.30782	0.211719	0.224175	2.91875	-0.141	11.9493	526895	6.69231e+06	550437	6.67287e+06	562080	6.66326e+06
12	4	731	-101.858	28.4435	13.2407	8.08374	0.20518	0.23499	1.27528	-0.814928	10.9385	525552	6.6878e+06	550438	6.67403e+06	562022	6.66762e+06
12	4	732	-103.441	30.3768	12.136	8.76515	0.195107	0.220275	1.13442	-0.836207	11.8989	520739	6.67962e+06	550769	6.67505e+06	562767	6.67322e+06
12	4	733	-100.345	29.3605	13.3223	8.14279	0.195818	0.231332	3.11939	-0.360659	11.6349	526903	6.69172e+06	551609	6.67585e+06	562819	6.66866e+06
12	4	734	-100.359	28.9287	12.8082	8.8627	0.198769	0.232625	1.79329	-0.627325	10.6378	526903	6.69154e+06	551859	6.67691e+06	562908	6.67043e+06
12	4	735	-106.044	29.1217	10.3845	10.5105	0.208637	0.230989	1.24234	-0.643519	9.71264	526903	6.69142e+06	552616	6.67775e+06	561785	6.67287e+06
12	4	736	-107.262	32.4082	10.4916	10.4104	0.189631	0.209162	1.57504	-0.463272	10.8236	526170	6.69679e+06	553072	6.67871e+06	561781	6.67286e+06
12	4	737	-104.97	32.4743	11.0622	5.92995	0.185202	0.215206	1.63693	0.525954	10.7866	526362	6.69698e+06	553777	6.67958e+06	563115	6.67365e+06
13	0	738	-100.129	37.9295	10.7945	7.33758	0.151253	0.177893	1.58126	-0.71984	14.0521	528864	6.70827e+06	555428	6.6812e+06	562988	6.67349e+06
13	0	739	-108.77	31.3537	29.2168	5.15868	0.198766	0.215289	1.10475	-0.582347	11.7709	526552	6.69314e+06	555917	6.68215e+06	583281	6.67191e+06
13	0	740	-112.213	30.6939	27.4163	3.32115	0.209466	0.227994	0.829761	0.537641	12.4896	526871	6.69265e+06	556086	6.68324e+06	582182	6.67483e+06
13	0	741	-108.685	30.5309	24.1667	2.80671	0.203964	0.22358	2.93415	-0.22075	12.0121	526897	6.69218e+06	556648	6.68532e+06	580197	6.67989e+06
13	0	742	-112.478	32.7924	25.0593	3.12868	0.196524	0.208004	1.64394	-0.26209	12.8117	526625	6.69799e+06	557236	6.68623e+06	580628	6.67724e+06
13	0	743	-118.894	33.5577	30.0211	3.16256	0.202997	0.207702	0.139214	0.455122	11.7632	528321	6.70344e+06	557687	6.6872e+06	583958	6.67267e+06
13	0	744	-108.63	31.7243	24.1319	2.4311	0.196191	0.212984	1.16874	-0.557311	12.6719	526319	6.69367e+06	557601	6.6884e+06	581397	6.68438e+06
13	0	745	-116.195	32.1518	23.7538	2.8146	0.207063	0.21325	2.43606	-0.0894363	11.6472	528093	6.69993e+06	558367	6.6891e+06	580734	6.6811e+06
13	0	746	-102.046	32.0762	25.7077	1.76735	0.182278	0.210088	1.58119	-0.65041	12.2216	525471	6.68754e+06	557417	6.69043e+06	583020	6.69275e+06
13	0	747	-98.7029	38.8523	28.4869	1.30902	0.145558	0.171556	0.996201	-1.22476	12.6665	520581	6.67927e+06	557029	6.69273e+06	583753	6.70259e+06
13	0	748	-98.277	30.3441	26.5634	1.52662	0.185566	0.217617	0.995405	-1.25026	9.78388	526903	6.69144e+06	557156	6.6938e+06	583639	6.69585e+06
13	0	749	-102.295	32.8281	25.5065	1.79741	0.178538	0.204508	1.28164	-0.791366	8.65981	528888	6.70995e+06	558453	6.69568e+06	581425	6.68459e+06
13	0	750	-95.3482	32.9236	25.7518	1.76137	0.16593	0.202233	1.31472	-1.07415	9.04185	529693	6.71225e+06	558718	6.69671e+06	581420	6.68456e+06
13	0	751	-102.581	35.8129	26.4171	1.86226	0.164115	0.188541	1.52615	-0.653805	10.4301	531315	6.71916e+06	559859	6.69753e+06	580915	6.68158e+06
13	0	752	-103.57	32.0944	23.4968	1.95389	0.184895	0.210059	1.47802	-0.636791	9.33235	529052	6.7075e+06	560627	6.70174e+06	583743	6.69753e+06
13	0	753	-101.392	32.423	23.0957	1.78465	0.179172	0.207398	1.46388	-0.72817	9.37778	528258	6.70275e+06	560681	6.70283e+06	583777	6.70288e+06
13	0	754	-101.67	31.5837	23.2061	1.75929	0.184438	0.212579	1.3827	-0.759392	9.03296	529133	6.70497e+06	560699	6.70393e+06	583892	6.70315e+06
13	0	755	-97.0923	31.9948	24.8305	1.71099	0.173871	0.206215	0.974692	-1.34646	8.6982	528636	6.70412e+06	560617	6.70505e+06	585437	6.70576e+06
13	0	756	-106.91	36.1828	25.2466	1.83716	0.169293	0.188146	2.07967	-0.360464	12.3486	532449	6.72665e+06	562022	6.7058e+06	582656	6.69126e+06
13	0	757	-93.8474	37.8561	26.8941	1.76967	0.142039	0.178388	2.18268	-0.686178	12.4092	534459	6.73252e+06	562274	6.70684e+06	582034	6.6886e+06
13	0	758	-92.8037	32.8689	25.204	1.83377	0.161771	0.203164	1.60105	-0.973005	9.24368	529105	6.70713e+06	561962	6.70802e+06	587157	6.70869e+06
13	0	759	-100.03	33.1865	24.0423	1.87805	0.172699	0.203386	1.84896	-0.618619	9.18018	529293	6.71112e+06	562412	6.70901e+06	586406	6.70748e+06
13	0	760	-102.913	32.9968	22.4009	1.89185	0.178698	0.205077	1.84811	-0.529552	11.3009	531718	6.72138e+06	562701	6.71003e+06	583736	6.70233e+06
13	0	761	-93.1664	33.469	27.5193	1.71486	0.159492	0.199514	1.54935	-0.992079	9.45034	528879	6.7098e+06	562317	6.71123e+06	589812	6.7124e+06
13	0	762	-93.3429	33.672	32.4304	1.6886	0.15883	0.196725	1.1953	-1.27761	9.64723	529041	6.70757e+06	562378	6.71231e+06	594485	6.71688e+06
13	0	763	-106.191	43.4856	51.7748	1.067	0.139915	0.153396	0.592168	-1.33605	12.3075	526500	6.69322e+06	564013	6.71521e+06	608676	6.7414e+06
13	0	764	-110.61	36.8649	36.2501	1.79566	0.171911	0.184241	1.18782	-0.452865	13.3158	529313	6.70635e+06	564864	6.7161e+06	599822	6.7257e+06
13	0	765	-109.008	34.5444	23.2599	1.96254	0.180801	0.195985	1.17237	-0.537138	10.3575	535446	6.73476e+06	565153	6.71713e+06	585155	6.70526e+06
13	0	766	-130.767	39.2683	22.8125	1.97141	0.1908	0.178985	0.721789	0.854661	7.00463	535390	6.74216e+06	566309	6.71795e+06	584272	6.70389e+06
13	0	767	-121.999	33.8961	25.401	2.05951	0.206219	0.203722	0.779589	0.146933	10.0484	532798	6.72746e+06	565673	6.7192e+06	590309	6.71302e+06
13	0	768	-119.229	38.6922	46.7733	1.27344	0.176555	0.17762	2.62801	-0.0167968	11.39	529244	6.70655e+06	565381	6.72038e+06	609065	6.73709e+06
13	0	769	-139.215	34.0249	27.9207	1.98247	0.234429	0.209125	0.959307	1.14756	6.7708	533197	6.72985e+06	566381	6.72233e+06	593612	6.71616e+06
13	0	770	-126.81	32.8246	27.1509	1.97179	0.221347	0.213302	0.660039	0.591122	6.72472	535185	6.73364e+06	566381	6.72343e+06	592185	6.71498e+06
13	0	771	-122.619	34.5607	26.0966	2.16907	0.20328	0.201384	0.357608	0.419585	7.18047	535461	6.73792e+06	567233	6.72432e+06	591225	6.71405e+06
13	0	772	-119.813	35.5214	26.4014	2.09343	0.193257	0.194167	0.0960624	0.111362	8.25321	535326	6.74081e+06	567329	6.7254e+06	591115	6.71394e+06
13	0	773	-113.492	34.7654	32.4398	2.07055	0.187042	0.195859	1.10059	-0.338754	6.811	532481	6.72671e+06	567246	6.72652e+06	599685	6.72634e+06
13	0	774	-107.905	34.8403	32.7555	1.88895	0.177451	0.193924	1.12837	-0.614094	6.54308	532421	6.72591e+06	567219	6.72762e+06	599935	6.72924e+06
13	0	775	-161.989	51.3889	26.6095	1.96731	0.180608	0.141424	0.867518	2.77296	12.8296	539529	6.76999e+06	570541	6.72901e+06	586599	6.70779e+06
13	0	776	-156.091	50.3265	27.1797	1.87718	0.177707	0.141823	1.1193	1.84726	11.9386	539410	6.76977e+06	570431	6.73014e+06	587185	6.70874e+06
13	0	777	-110.395	48.3424	41.2056	1.05835	0.130841	0.138864	0.470411	-1.16981	10.6517	528811	6.7044e+06	568740	6.73165e+06	602774	6.75488e+06
13	0	778	-100.46	47.4181	40.4981	1.06013	0.121387	0.140294	0.70421	-1.58974	9.63665	529348	6.70625e+06	568655	6.73277e+06	602225	6.75542e+06
13	0	779	-114.589	36.9522	31.5361	2.49273	0.177674	0.184593	1.05317	-0.294323	15.1773	536330	6.74953e+06	569680	6.73362e+06	598141	6.72004e+06
13	0	780	-104.216	34.115	31.2884	2.58212	0.175029	0.196467	1.02698	-0.880512	6.48056	536010	6.74291e+06	569159	6.73485e+06	599562	6.72746e+06
13	0	781	-112.403	35.2699	30.814	3.47098	0.182597	0.192646	1.03708	-0.419673	14.7315	535441	6.74235e+06	570082	6.73572e+06	600347	6.72993e+06
13	0	782	-109.356	44.3224	30.94	2.20926	0.141365	0.15399	1.86814	-0.326337	12.7943	536698	6.76512e+06	570687	6.73667e+06	594415	6.71682e+06
13	0	783	-114.155	36.7593	30.6088	3.66059	0.17793	0.185455	1.0655	-0.314291	7.75151	536297	6.75036e+06	570820	6.73774e+06	599567	6.72723e+06
13	0	784	-133.623	43.6871	32.834	3.79921	0.175247	0.163367	0.487545	1.60093	12.7387	534684	6.76152e+06	571866	6.73858e+06	599812	6.72135e+06
13	0	785	-132.134	40.9983	30.237	3.52247	0.184658	0.172994	0.554279	1.2542	11.132	533633	6.75514e+06	571631	6.73974e+06	599655	6.72839e+06
13	0	786	-135.846	37.1191	34.7217	3.87978	0.209686	0.191968	0.696471	1.30352	10.7143	536331	6.74952e+06	572376	6.74066e+06	606094	6.73237e+06
13	0	787	-134.227	41.5173	31.547	3.65048	0.185238	0.169527	0.848498	0.960598	11.5509	533219	6.75564e+06	572349	6.74176e+06	602082	6.73122e+06
13	0	788	-98.7229	48.7741	32.3483	0.971611	0.115971	0.13707	0.879254	-1.38639	11.3846	530969	6.71467e+06	570435	6.74333e+06	596610	6.76234e+06
13	0	789	-100.477	47.1934	31.3959	0.968178	0.121985	0.142285	0.991035	-1.12858	9.50054	531335	6.71821e+06	570597	6.74439e+06	596716	6.76181e+06
13	0	790	-112.948	40.0452	34.3956	1.91779	0.161603	0.170428	1.35949	-0.297159	8.18855	534636	6.76141e+06	571307	6.74532e+06	602804	6.7315e+06
13	0	791	-109.235	39.7166	33.4188	1.90264	0.157584	0.170777	1.13477	-0.543453	9.16338	536520	6.76491e+06	571627	6.74634e+06	601168	6.73071e+06
13	0	792	-117.124	40.4062	34.1602	2.02312	0.16608	0.16975	1.69121	-0.097423	8.55093	540842	6.77196e+06	572744	6.74717e+06	599714	6.7262e+06
13	0	793	-118.713	39.8382	33.063	2.28004	0.170734	0.172688	3.0874	0.023861	8.08011	540715	6.77157e+06	572979	6.74821e+06	599756	6.72881e+06
13	0	794	-114.704	36.4475	31.9964	2.29035	0.180315	0.187464	1.32707	-0.228628	9.13777	536263	6.74858e+06	572704	6.74927e+06	604694	6.74988e+06
13	0	795	-103.327	39.233	26.8499	1.52324	0.150898	0.169393	0.704557	-1.35581	8.9171	535674	6.73582e+06	572084	6.75043e+06	597002	6.76043e+06
13	0	796	-97.141	37.1531	28.8406	1.72996	0.149806	0.17912	1.06337	-1.23154	9.04045	536025	6.74292e+06	572175	6.7515e+06	600236	6.75816e+06
13	0	797	-94.2183	39.3512	32.7274	1.85666	0.137182	0.170292	1.44316	-1.02336	5.76984	533149	6.75653e+06	572300	6.75256e+06	604861	6.74926e+06
13	0	798	-83.4643	38.6863	31.5576	1.84655	0.123613	0.172672	1.84879	-1.13188	5.66009	533821	6.75813e+06	572435	6.75578e+06	603934	6.75386e+06
13	0	799	-75.3707	38.7572	30.1225	1.91662	0.111422	0.171096	1.79048	-1.42768	5.11558	533871	6.75917e+06	572558	6.75684e+06	602626	6.75502e+06
13	0	800	-59.9264	38.9088	27.8182	1.72414	0.0882456	0.168367	1.78516	-1.92747	4.83557	533490	6.75713e+06	572390	6.75794e+06	600202	6.75852e+06
13	0	801	-63.4395	38.5696	24.5804	1.54035	0.0942404	0.167679	1.33108	-2.43419	4.90606	534037	6.75389e+06	572262	6.75904e+06	596623	6.76232e+06
13	0	802	-87.8804	34.0643	40.282	1.71894	0.147814	0.194648	1.46227	-1.25826	8.76583	544271	6.77731e+06	573572	6.75993e+06	608221	6.73939e+06
13	0	803	-84.4406	32.688	40.0246	1.70704	0.148008	0.19877	1.07104	-1.90204	8.03614	544273	6.77607e+06	573304	6.76105e+06	608850	6.74265e+06
13	0	804	-135.093	45.5347	46.1445	1.46539	0.169986	0.160918	0.307946	2.80819	19.3152	553255	6.80083e+06	576516	6.76168e+06	600088	6.72201e+06
13	0	805	-152.099	47.9734	47.9244	1.16356	0.181655	0.161952	0.333193	5.51966	22.7399	558565	6.80689e+06	577163	6.76267e+06	595742	6.7185e+06
13	0	806	-148.547	35.913	24.5473	4.76458	0.236991	0.203298	0.781329	2.09325	9.18521	542655	6.77384e+06	577123	6.76376e+06	600682	6.75686e+06
13	0	807	-142.332	43.1791	15.8658	5.50626	0.188864	0.166241	0.702792	1.82054	11.1511	534021	6.75983e+06	576905	6.76486e+06	592663	6.76672e+06
14	4	808	-142.491	40.1093	31.0169	5.16745	0.203545	0.189887	0.330318	3.9011	14.2194	544236	6.78684e+06	578351	6.76574e+06	604733	6.74943e+06
14	4	809	-144.503	40.1826	38.5361	4.34882	0.206044	0.187362	0.402683	3.48637	15.9362	546490	6.79124e+06	578398	6.76681e+06	608999	6.74339e+06
14	4	810	-162.694	40.9427	14.1638	8.14798	0.227675	0.182347	0.755598	3.23726	13.7773	537354	6.76627e+06	578264	6.76791e+06	592416	6.76848e+06
14	4	811	-138.633	48.4665	25.4788	1.45462	0.163888	0.148624	0.484049	2.20551	15.1347	535378	6.74433e+06	576995	6.76917e+06	598873	6.78222e+06
14	4	812	-131.508	46.6063	23.8677	3.92445	0.16167	0.15158	0.528544	1.24747	10.5112	533151	6.75597e+06	577542	6.77017e+06	600276	6.77744e+06
14	4	813	-122.194	35.3412	15.5398	6.94062	0.198103	0.195447	0.771339	0.162996	11.3432	541797	6.773e+06	577098	6.77131e+06	592620	6.77057e+06
14	4	814	-120.289	44.9188	20.1816	1.9417	0.153433	0.153115	1.11837	0.014782	13.4924	533891	6.75931e+06	576855	6.77242e+06	596159	6.77831e+06
14	4	815	-123.796	37.4668	24.8619	2.88922	0.189313	0.184782	0.841845	0.258319	11.0436	539587	6.77006e+06	576897	6.77349e+06	601654	6.77577e+06
14	4	816	-131.471	35.0408	17.4334	4.13462	0.214969	0.200789	0.822869	0.798647	11.6142	542643	6.78029e+06	577207	6.77453e+06	594403	6.77166e+06
14	4	817	-126.91	35.2274	18.8907	3.61065	0.206412	0.198326	0.706927	0.560013	11.3592	542696	6.7822e+06	577298	6.77559e+06	595853	6.77205e+06
14	4	818	-120.094	32.8894	24.0499	2.32257	0.209211	0.209289	0.141585	0.0378809	11.4579	544301	6.77643e+06	577190	6.77669e+06	601239	6.77688e+06
14	4	819	-127.017	35.1981	24.2081	2.83185	0.206758	0.197741	0.939025	0.428086	10.5565	542726	6.78254e+06	577591	6.77771e+06	601570	6.77439e+06
14	4	820	-121.772	32.84	18.9492	2.26036	0.212454	0.210077	0.908855	0.111683	10.2808	544335	6.77862e+06	577175	6.77885e+06	596123	6.77898e+06
14	4	821	-134.025	34.78	23.934	3.6203	0.220789	0.203079	0.869718	0.923902	11.0602	543523	6.78503e+06	577911	6.77982e+06	601575	6.77624e+06
14	4	822	-136.156	32.3092	17.2118	2.19642	0.241452	0.223802	0.58288	1.58805	11.1775	551544	6.79866e+06	578483	6.78082e+06	592834	6.77132e+06
14	4	823	-135.492	33.5511	24.0006	3.34181	0.231381	0.212575	0.735104	1.2074	10.0126	546039	6.79052e+06	578464	6.7819e+06	601659	6.77574e+06
14	4	824	-120.232	43.0159	18.0263	1.6718	0.160144	0.159911	0.656622	0.020214	11.5388	537741	6.7668e+06	577546	6.78311e+06	594227	6.78994e+06
14	4	825	-116.784	45.2037	19.5383	1.41599	0.148023	0.151393	0.872788	-0.211117	11.1944	536505	6.76489e+06	577373	6.78421e+06	595038	6.79256e+06
14	4	826	-145.204	29.8759	21.2548	1.82029	0.278469	0.244919	0.80063	1.80356	11.2566	555410	6.80332e+06	579052	6.78506e+06	595871	6.77206e+06
14	4	827	-135.559	29.0878	25.8934	2.10934	0.267016	0.245393	0.833334	1.0697	10.2669	554026	6.80172e+06	578625	6.78619e+06	600523	6.77238e+06
14	4	828	-121.242	35.8019	17.0801	4.33699	0.194029	0.193043	0.383144	0.185709	8.91305	543026	6.78301e+06	578239	6.78948e+06	595038	6.79257e+06
14	4	829	-120.597	33.226	16.573	4.82371	0.20796	0.207476	0.391575	0.087344	9.60184	545215	6.78877e+06	578393	6.79054e+06	594943	6.79142e+06
14	4	830	-119.074	29.845	15.9638	4.67464	0.228595	0.230032	1.19937	-0.044224	8.1071	548865	6.79518e+06	578495	6.7916e+06	594344	6.78969e+06
14	4	831	-129.48	26.2288	17.7218	4.60407	0.282842	0.269455	0.762104	0.712668	8.86834	555354	6.80327e+06	579301	6.79257e+06	595481	6.78534e+06
14	4	832	-131.254	26.1786	15.3383	5.84922	0.287266	0.270638	0.832925	0.774085	8.3549	554289	6.80209e+06	579408	6.79471e+06	594125	6.79039e+06
14	4	833	-132.641	29.0956	15.9145	6.67327	0.261197	0.245045	0.697878	1.03775	8.2638	550396	6.7972e+06	579457	6.79578e+06	595353	6.79501e+06
14	4	834	-130.06	28.4491	15.9691	6.28854	0.261935	0.248161	0.775278	0.743392	8.12034	551083	6.79813e+06	579504	6.79686e+06	595457	6.79614e+06
14	4	835	-120.68	29.0139	15.7448	6.34119	0.238314	0.23804	0.298911	0.130319	8.08342	550397	6.7972e+06	579401	6.79795e+06	595141	6.79835e+06
14	4	836	-121.549	28.9766	17.0409	6.35915	0.240339	0.238757	0.493801	0.179697	8.3683	550451	6.79741e+06	579382	6.79903e+06	596397	6.79998e+06
14	4	837	-127.797	23.0173	16.0656	6.19702	0.318114	0.307479	0.680201	0.656706	9.6762	557776	6.80612e+06	579972	6.80003e+06	595464	6.79577e+06
14	4	838	-124.781	22.1227	16.2178	6.43741	0.323167	0.318033	0.543305	0.504166	9.44406	559036	6.80798e+06	580059	6.80109e+06	595470	6.79604e+06
14	4	839	-122.813	24.9759	17.5122	6.45998	0.281736	0.278693	0.527396	0.305587	9.44838	555082	6.80301e+06	580044	6.80217e+06	597546	6.80159e+06
14	4	840	-124.063	23.5842	16.8723	6.55043	0.301398	0.296016	0.650838	0.357691	9.19352	556671	6.80481e+06	580202	6.80323e+06	597037	6.8021e+06
14	4	841	-121.9	23.1819	17.5354	6.4243	0.301283	0.298305	0.81476	0.133633	8.873	556962	6.80521e+06	580127	6.80432e+06	597649	6.80364e+06
14	4	842	-128.162	21.7945	17.3008	6.66581	0.336923	0.324309	0.786886	0.594295	8.7884	559388	6.81004e+06	580666	6.80532e+06	597557	6.80158e+06
14	4	843	-128.537	22.4966	17.7403	6.56534	0.327362	0.315671	0.682897	0.716208	8.28294	559319	6.81314e+06	580777	6.80638e+06	597699	6.80106e+06
14	4	844	-126.204	21.6516	14.2691	7.0851	0.333964	0.326033	0.630734	0.563507	8.40061	559086	6.8081e+06	580729	6.80747e+06	594992	6.80706e+06
14	4	845	-122.436	22.3856	15.983	6.95933	0.313372	0.310628	0.554761	0.251612	8.21508	558286	6.80659e+06	580584	6.80857e+06	596504	6.80998e+06
14	4	846	-125.157	21.4556	15.6168	6.96821	0.33422	0.327422	0.646589	0.456979	7.8816	559525	6.81139e+06	580907	6.8096e+06	596469	6.8083e+06
14	4	847	-121.55	21.6223	16.1306	7.0733	0.322086	0.321068	0.426805	0.208075	7.96809	559342	6.81307e+06	580816	6.81054e+06	596836	6.80865e+06
14	4	848	-121.269	21.1498	10.9051	9.97215	0.328521	0.328322	0.348506	0.208694	7.9565	559697	6.81083e+06	580833	6.81161e+06	591731	6.81201e+06
14	4	849	-135.236	22.9838	18.2289	6.87847	0.337124	0.320481	0.570431	1.53034	8.99434	560728	6.82195e+06	581753	6.81266e+06	598428	6.8053e+06
14	4	850	-125.831	22.7387	16.0413	8.56374	0.317058	0.317173	0.314708	1.06151	8.50545	560054	6.82111e+06	581562	6.81373e+06	596735	6.80853e+06
14	4	851	-126.541	22.2084	9.16606	11.714	0.326461	0.320833	0.481385	0.778478	7.55019	559449	6.81203e+06	581484	6.8148e+06	590578	6.81595e+06
14	4	852	-128.502	23.1898	8.88168	11.9543	0.31749	0.307308	0.596404	0.816722	8.07489	558433	6.81645e+06	581615	6.81587e+06	590494	6.81565e+06
14	4	853	-143.052	24.524	16.3759	10.5435	0.334211	0.303136	0.716617	1.84299	10.375	561483	6.8292e+06	582708	6.81692e+06	596882	6.80871e+06
14	4	854	-135.668	22.9037	8.52714	12.187	0.339383	0.317246	0.728942	1.23148	9.95866	560485	6.82498e+06	582297	6.81799e+06	590417	6.81539e+06
14	4	855	-148.502	22.8735	8.06585	11.4337	0.371976	0.331275	0.770564	2.11914	10.5411	560876	6.82408e+06	583189	6.81905e+06	591057	6.81727e+06
14	4	856	-145.648	23.5333	8.33955	11.974	0.3546	0.319647	0.726061	2.02386	9.87746	561514	6.82927e+06	583193	6.82011e+06	590875	6.81687e+06
14	4	857	-128.506	25.3602	20.7321	5.18826	0.290327	0.281033	0.544281	0.895345	9.55379	559388	6.80997e+06	582125	6.8212e+06	600712	6.83038e+06
14	4	858	-130.361	25.2452	19.1658	6.89501	0.295861	0.286449	0.477605	1.24291	10.2135	558511	6.81435e+06	582483	6.82226e+06	600683	6.82827e+06
15	1	859	-180.592	43.9926	9.33282	11.1881	0.235202	0.177584	0.658004	5.27586	15.4086	555412	6.8563e+06	584504	6.8233e+06	590676	6.8163e+06
15	1	860	-204.674	54.6095	9.27497	11.0174	0.214741	0.152488	0.509551	9.52081	21.5825	556836	6.87063e+06	585810	6.82435e+06	590731	6.81648e+06
15	1	861	-202.326	36.4374	11.6594	9.22003	0.318143	0.223232	0.836619	5.63769	13.5772	554313	6.84385e+06	585745	6.82541e+06	595803	6.81952e+06
15	1	862	-240.273	32.3878	12.1038	8.35307	0.425048	0.285313	0.831205	8.28992	15.0581	556810	6.83519e+06	588885	6.8307e+06	600872	6.82903e+06
15	1	863	-234.563	27.3896	10.9676	9.59636	0.490666	0.360746	0.787871	8.3308	15.1501	561516	6.82928e+06	588792	6.83177e+06	599714	6.83277e+06
15	1	864	-231.324	27.8564	14.6702	8.00626	0.475783	0.346671	0.794894	8.02367	14.9973	561031	6.82851e+06	588547	6.83285e+06	603038	6.83513e+06
15	1	865	-226.633	30.6911	14.7171	7.74516	0.423083	0.301886	0.771743	7.91616	14.4816	557972	6.83332e+06	588618	6.83498e+06	603313	6.83578e+06
15	1	866	-228.783	33.3976	14.3095	7.79304	0.392487	0.274328	0.747771	8.33474	14.3053	555426	6.8382e+06	588754	6.83605e+06	603034	6.83513e+06
15	1	867	-229.774	32.9294	15.4694	7.73248	0.399791	0.278019	0.767043	8.19931	14.133	555710	6.83743e+06	588638	6.83712e+06	604106	6.83697e+06
15	1	868	-231.093	32.7785	14.9504	7.57742	0.403936	0.281172	0.764475	8.32568	14.1474	555913	6.83674e+06	588659	6.83819e+06	603595	6.83885e+06
15	1	869	-223.85	33.8375	14.283	7.47713	0.379031	0.269877	0.711596	8.36125	14.4935	554841	6.84073e+06	588676	6.84032e+06	602958	6.84015e+06
15	1	870	-226.084	33.9293	14.994	7.37209	0.381778	0.269813	0.719523	8.44706	14.6238	554760	6.8417e+06	588688	6.84139e+06	603682	6.84126e+06
15	1	871	-211.984	28.638	15.1563	7.33697	0.424106	0.334577	0.651551	8.08847	14.6722	561980	6.83078e+06	587615	6.84355e+06	601182	6.8503e+06
15	1	872	-203.275	32.2639	12.9053	8.83208	0.36098	0.274465	0.661401	7.21361	13.8532	556433	6.83576e+06	587458	6.84462e+06	599867	6.84816e+06
15	1	873	-206.319	32.9151	12.3767	9.4083	0.359138	0.265538	0.704221	7.02264	11.4411	554663	6.84206e+06	587378	6.84569e+06	599680	6.84705e+06
15	1	874	-205.364	33.093	12.9368	9.40844	0.355554	0.273145	0.617401	7.92164	13.2053	554389	6.84711e+06	587480	6.84675e+06	600417	6.84661e+06
15	1	875	-206.611	33.1022	11.6253	8.76007	0.357613	0.26658	0.678739	7.3109	13.0335	554391	6.84918e+06	587466	6.84782e+06	599081	6.84735e+06
15	1	876	-206.139	33.9014	13.922	9.57137	0.348386	0.258778	0.673059	7.3325	13.5203	555005	6.8403e+06	587163	6.85103e+06	600370	6.85544e+06
15	1	877	-205.229	32.8746	13.4476	9.67384	0.357681	0.267576	0.680153	7.17933	13.0227	554409	6.85001e+06	587131	6.85317e+06	600516	6.85446e+06
15	1	878	-210.718	32.4093	13.3969	9.51971	0.372519	0.272889	0.720444	7.21427	12.532	554730	6.85399e+06	587139	6.85424e+06	600535	6.85434e+06
15	1	879	-217.091	32.1242	13.2552	8.65228	0.387192	0.279017	0.74341	7.48255	12.5893	555016	6.85544e+06	587140	6.8553e+06	600395	6.85525e+06
15	1	880	-214.361	31.6962	13.3077	7.19451	0.387483	0.28417	0.72069	7.50139	12.5543	555441	6.85635e+06	587137	6.85637e+06	600445	6.85638e+06
15	1	881	-212.182	33.5165	33.8145	8.21317	0.362716	0.260839	0.737873	7.15753	12.4142	554346	6.84803e+06	586511	6.85745e+06	618963	6.86695e+06
15	1	882	-147.098	30.7141	43.5786	6.44346	0.274401	0.241594	0.688344	2.25542	9.02129	554401	6.84879e+06	582702	6.86072e+06	622857	6.87765e+06
15	1	883	-127.213	32.7549	55.3736	4.34189	0.222524	0.22074	0.257083	1.60762	8.48045	554304	6.84352e+06	581479	6.86181e+06	627420	6.89272e+06
15	1	884	-118.889	31.5381	52.9755	4.98545	0.215986	0.218361	1.23872	0.0513888	8.3757	554384	6.84661e+06	581403	6.86288e+06	626787	6.8902e+06
15	1	885	-160.995	57.9381	22.6724	4.65986	0.15921	0.125314	0.7646	3.07184	10.0299	542501	6.90478e+06	583571	6.86391e+06	599643	6.84792e+06
15	1	886	-158.91	56.5984	23.4887	4.5316	0.160867	0.128315	0.739278	3.01542	9.37939	542414	6.90401e+06	583406	6.86498e+06	600417	6.84878e+06
15	1	887	-179.923	79.6289	37.7599	3.16417	0.12946	0.0943308	0.509235	6.74192	17.4041	544945	6.93729e+06	584476	6.86817e+06	603221	6.83539e+06
15	1	888	-147.774	55.6657	22.8018	4.21466	0.152101	0.129528	0.615708	2.58447	8.02945	542381	6.90761e+06	582738	6.86927e+06	599269	6.85356e+06
15	1	889	-144.953	36.3081	59.3496	1.26244	0.228742	0.204775	0.523236	2.73238	10.3454	554361	6.8477e+06	582749	6.87033e+06	629153	6.90733e+06
15	1	890	-141.112	25.2933	37.1477	3.72143	0.319651	0.291676	0.702752	1.72118	5.59745	557444	6.87247e+06	582738	6.87247e+06	619885	6.87247e+06
15	1	891	-147.195	26.4702	36.5409	3.16392	0.318606	0.279092	0.848972	1.83521	5.96193	556512	6.87508e+06	582937	6.87353e+06	619415	6.87139e+06
15	1	892	-145.022	26.2943	37.7961	2.41097	0.316003	0.279742	0.835199	1.71643	5.8601	556490	6.8751e+06	582779	6.87458e+06	620568	6.87385e+06
15	1	893	-149.973	27.5035	36.7677	2.39391	0.312424	0.271353	0.792871	2.16584	5.93021	555768	6.87833e+06	583144	6.87568e+06	619742	6.87215e+06
15	1	894	-127.851	28.4519	55.0882	1.03649	0.257461	0.248396	0.582236	0.77254	5.34583	556967	6.86238e+06	581587	6.87664e+06	629256	6.90425e+06
16	0	895	-173.822	59.0721	35.8615	5.9401	0.168595	0.131049	0.466732	6.60706	18.4957	542833	6.92135e+06	583967	6.87895e+06	608939	6.85321e+06
16	0	896	-171.248	61.884	27.308	5.57482	0.158551	0.125662	0.409531	7.16978	24.6031	543799	6.92707e+06	584007	6.88003e+06	601750	6.85927e+06
16	0	897	-154.719	26.8995	45.8891	1.64424	0.329547	0.293145	0.577338	3.44545	6.86691	557491	6.87372e+06	583373	6.88105e+06	627525	6.89356e+06
16	0	898	-167.791	28.0996	43.2482	1.38919	0.342125	0.287377	0.655856	4.17482	7.37705	555734	6.87929e+06	583559	6.88321e+06	626384	6.88924e+06
16	0	899	-170.088	37.9017	39.6104	1.85786	0.257119	0.205919	0.635941	4.51256	9.01872	546336	6.88974e+06	583844	6.8843e+06	623043	6.87861e+06
16	0	900	-214.495	66.0376	37.0681	1.30519	0.186101	0.125706	0.477313	11.3428	32.0494	544870	6.93685e+06	586453	6.88555e+06	609794	6.85676e+06
16	0	901	-191.616	49.841	38.9042	1.63767	0.220275	0.159285	0.614569	6.67643	16.7818	541729	6.91107e+06	585106	6.88653e+06	618965	6.86737e+06
16	0	902	-212.479	32.3694	41.2935	1.53022	0.376095	0.272433	0.742872	7.13228	12.6296	554037	6.8843e+06	586230	6.88768e+06	627298	6.89198e+06
16	0	903	-209.321	49.5065	37.4422	1.4888	0.242254	0.163972	0.675512	7.57572	19.2761	541488	6.91007e+06	586164	6.88874e+06	619954	6.87261e+06
16	0	904	-209.501	40.36	40.9816	1.51478	0.297409	0.205959	0.73492	6.97729	15.0069	545835	6.89041e+06	586192	6.89089e+06	627171	6.89137e+06
16	0	905	-215.873	43.1629	39.5174	1.52302	0.286554	0.191275	0.761049	7.21737	15.4944	543520	6.89617e+06	586480	6.89198e+06	625811	6.88814e+06
16	0	906	-209.089	40.1705	41.8283	1.44113	0.298225	0.205745	0.755824	6.7531	14.9387	545969	6.89028e+06	586046	6.89302e+06	627777	6.89588e+06
16	0	907	-209.17	40.1071	42.1954	1.46794	0.298812	0.20761	0.730882	6.98992	15.2465	546384	6.88963e+06	586241	6.8941e+06	628173	6.89881e+06
16	0	908	-182.559	41.9108	41.9129	1.57093	0.249573	0.196259	0.521115	6.87811	15.8308	544065	6.89512e+06	585962	6.89623e+06	627860	6.89733e+06
16	0	909	-200.99	41.5191	42.6496	1.43401	0.277362	0.198383	0.676265	6.86148	15.8095	544611	6.89308e+06	585916	6.89729e+06	628345	6.90162e+06
16	0	910	-209.454	44.4282	41.4944	1.45015	0.270115	0.185081	0.704013	7.27977	18.8537	542407	6.90526e+06	586301	6.89839e+06	627296	6.89198e+06
16	0	911	-212.437	44.8116	41.6209	1.43045	0.271618	0.184337	0.704885	7.51326	19.4412	542382	6.90815e+06	586345	6.89946e+06	627177	6.8914e+06
16	0	912	-216.607	44.5295	41.4782	1.46701	0.278705	0.186685	0.718791	7.70028	19.3677	542358	6.90592e+06	586563	6.90055e+06	627739	6.89555e+06
16	0	913	-212.657	42.8403	42.5371	1.42888	0.28441	0.193686	0.723016	7.34224	18.4776	544119	6.89435e+06	586145	6.90266e+06	627874	6.91092e+06
16	0	914	-203.177	45.6517	43.1719	1.28842	0.254999	0.178948	0.659114	7.23016	20.875	542830	6.91962e+06	585616	6.9037e+06	626077	6.88864e+06
16	0	915	-185.928	37.0106	57.5236	1.15896	0.28783	0.229171	0.538902	7.00919	17.3621	554997	6.88251e+06	584622	6.9047e+06	630665	6.93918e+06
16	0	916	-197.071	42.7136	43.2607	1.39808	0.264348	0.189153	0.693751	6.36486	18.1196	543227	6.89801e+06	585223	6.90581e+06	627757	6.91371e+06
16	0	917	-175.375	41.9435	54.9956	1.37239	0.239564	0.187846	0.593928	5.34176	17.2392	543312	6.89712e+06	584122	6.9068e+06	637630	6.91951e+06
16	0	918	-174.651	41.8851	56.3597	1.3085	0.238909	0.190941	0.532816	5.8767	18.1571	546871	6.88881e+06	584167	6.90788e+06	634350	6.93353e+06
16	0	919	-180.896	42.6012	44.781	1.38883	0.243292	0.186602	0.606197	5.75552	18.172	541706	6.91192e+06	584265	6.91003e+06	629002	6.90804e+06
16	0	920	-184.668	43.4465	44.1611	1.37483	0.243532	0.181949	0.654749	5.65871	18.3125	540857	6.9126e+06	584278	6.9111e+06	628413	6.90957e+06
16	0	921	-213.872	49.9029	47.6052	1.14369	0.245555	0.173197	0.526999	10.2055	28.8291	546261	6.94249e+06	585986	6.91229e+06	623881	6.88348e+06
16	0	922	-217.872	52.3341	49.8487	1.09734	0.238527	0.170125	0.470436	11.9198	32.1683	547817	6.94877e+06	586379	6.91339e+06	623110	6.87969e+06
16	0	923	-211.782	43.7976	51.5311	1.46516	0.27705	0.189139	0.706186	7.44628	19.9074	542258	6.90902e+06	585722	6.91441e+06	636861	6.92076e+06
16	0	924	-204.874	45.4354	51.5449	1.28278	0.258353	0.180295	0.666055	7.30079	20.1361	543214	6.89881e+06	585059	6.91651e+06	632531	6.93659e+06
16	0	925	-210.958	44.8351	51.2541	1.49438	0.269585	0.1835	0.707401	7.36673	20.4809	540777	6.91376e+06	585447	6.91761e+06	636512	6.922e+06
16	0	926	-216.781	43.228	45.0915	1.37555	0.287326	0.196687	0.67035	8.27166	23.2745	543888	6.92987e+06	585644	6.91869e+06	629200	6.90702e+06
16	0	927	-173.433	47.4961	49.3475	0.835359	0.209215	0.171138	0.418157	7.3212	23.5668	551484	6.88427e+06	583238	6.91959e+06	616230	6.95629e+06
16	0	928	-266.388	54.1108	52.9737	0.999945	0.282065	0.195307	0.443596	18.9074	39.8701	552293	6.96145e+06	588259	6.92102e+06	623468	6.88144e+06
16	0	929	-195.618	42.4998	48.4841	1.26171	0.263719	0.198208	0.554614	7.81164	23.4621	545391	6.93908e+06	584222	6.9218e+06	628520	6.9021e+06
16	0	930	-195.451	65.9185	43.6562	0.657422	0.169884	0.13129	0.31904	13.55	31.809	556574	6.86304e+06	584239	6.92287e+06	602561	6.9625e+06
16	0	931	-244.932	51.583	56.0137	0.965078	0.272056	0.207484	0.388055	18.4457	38.3515	553161	6.96314e+06	586916	6.92413e+06	623570	6.88178e+06
16	0	932	-238.685	49.9019	54.6468	1.04954	0.274049	0.208625	0.401281	16.9459	36.1352	552256	6.96133e+06	586668	6.92519e+06	624352	6.88561e+06
16	0	933	-236.829	44.213	48.4603	1.76134	0.306905	0.198789	0.695331	9.62631	21.5044	542835	6.9201e+06	586618	6.92625e+06	634606	6.933e+06
16	0	934	-284.464	50.6921	53.4667	1.1739	0.321517	0.235345	0.438729	21.4777	38.2712	553619	6.96377e+06	589032	6.9275e+06	626385	6.88924e+06
16	0	935	-280.033	49.1943	52.5455	1.20231	0.326147	0.232479	0.467338	19.6197	36.4628	552433	6.96177e+06	588714	6.92854e+06	627467	6.89306e+06
16	0	936	-186.778	49.3351	41.686	1.30527	0.216916	0.164459	0.50821	7.52842	22.4539	542475	6.90338e+06	583108	6.93136e+06	617442	6.955e+06
16	0	937	-254.344	41.7867	49.1286	1.98057	0.34874	0.226807	0.670905	11.4726	24.3288	545480	6.93936e+06	587022	6.93485e+06	635864	6.92955e+06
16	0	938	-254.243	41.6373	50.2474	1.94562	0.349852	0.237829	0.604277	12.7281	25.1587	546603	6.94528e+06	587177	6.93593e+06	636140	6.92465e+06
16	0	939	-273.644	41.495	49.2997	2.24679	0.377839	0.247859	0.639941	13.7556	25.9056	547168	6.94699e+06	587787	6.93852e+06	636047	6.92844e+06
16	0	940	-260.631	41.6783	43.19	2.32696	0.358289	0.235254	0.647034	12.4526	24.3415	545493	6.9394e+06	587171	6.93947e+06	630361	6.93954e+06
16	0	941	-281.587	41.3757	48.7254	2.45777	0.389926	0.259899	0.620443	14.9214	26.564	548014	6.95016e+06	588323	6.94083e+06	635793	6.92984e+06
16	0	942	-269.799	40.643	45.7791	2.43273	0.380339	0.254708	0.628776	13.6495	25.125	547121	6.94675e+06	587452	6.94173e+06	632880	6.93607e+06
16	0	943	-262.838	54.6491	30.5359	2.57085	0.275565	0.16725	0.604408	13.54	28.4131	541034	6.91335e+06	587104	6.94274e+06	612845	6.95917e+06
17	5	944	-285.433	39.94	50.6086	2.46927	0.409461	0.293097	0.575068	16.4821	27.9582	550490	6.95707e+06	588268	6.94411e+06	636139	6.92769e+06
17	5	945	-258.076	42.8847	33.6012	3.74529	0.344797	0.228088	0.620907	12.7408	24.4132	544820	6.93528e+06	586628	6.94483e+06	619386	6.95231e+06
17	5	946	-255.937	60.2867	22.4241	2.49924	0.243238	0.151599	0.521532	14.9336	31.9117	542500	6.90479e+06	586585	6.94591e+06	602982	6.96121e+06
17	5	947	-247.722	47.4871	29.0993	2.55648	0.298888	0.19737	0.578393	12.6518	25.8604	543498	6.92483e+06	585608	6.94678e+06	611412	6.96023e+06
17	5	948	-281.895	37.5442	51.3149	2.78536	0.430189	0.335635	0.543725	17.0594	26.569	552259	6.96133e+06	587471	6.94831e+06	635598	6.9305e+06
17	5	949	-262.533	36.1031	54.1349	2.71265	0.416633	0.357513	0.484019	16.8719	26.41	553675	6.96384e+06	586688	6.94922e+06	636189	6.92731e+06
17	5	950	-253.841	60.9565	21.1746	3.51285	0.238595	0.150314	0.503977	15.2156	30.8115	541113	6.90865e+06	585794	6.95012e+06	601315	6.96452e+06
17	5	951	-259.945	44.2173	17.2558	4.83704	0.336827	0.225018	0.586873	13.6622	25.0637	544805	6.93488e+06	585889	6.95123e+06	601921	6.95761e+06
17	5	952	-240.388	47.563	20.2994	4.26439	0.289575	0.199079	0.529495	13.0266	24.5675	542252	6.93085e+06	584813	6.95208e+06	602978	6.96114e+06
17	5	953	-242.146	43.7079	19.4395	5.02876	0.317421	0.22536	0.530206	13.1991	24.5266	544780	6.93623e+06	585045	6.95323e+06	602953	6.96079e+06
17	5	954	-242.179	35.974	31.7091	4.52045	0.385713	0.298714	0.540252	12.9572	22.9254	548774	6.952e+06	584678	6.95424e+06	616326	6.95622e+06
17	5	955	-243.618	38.0401	17.3405	5.34501	0.36693	0.27424	0.546103	12.9693	23.3106	547302	6.94802e+06	584634	6.95533e+06	601652	6.95866e+06
17	5	956	-250.929	35.4193	17.3825	5.27665	0.405907	0.310056	0.566379	13.2445	22.3822	549197	6.95372e+06	584515	6.9564e+06	601848	6.95771e+06
17	5	957	-245.418	34.4365	17.0706	5.56162	0.408323	0.327213	0.535273	13.4244	22.2465	550144	6.95635e+06	584561	6.9575e+06	601622	6.95808e+06
17	5	958	-240.423	34.8411	18.7358	4.21613	0.395367	0.317986	0.52193	13.2193	21.9983	549649	6.95469e+06	584278	6.95853e+06	602899	6.9606e+06
17	5	959	-237.931	38.5419	18.1238	2.69576	0.3537	0.271784	0.510158	13.2445	23.2674	547259	6.94757e+06	583895	6.95954e+06	601123	6.96517e+06
17	5	960	-210.102	71.5186	29.6286	0.879882	0.168319	0.123955	0.321625	16.051	34.8171	542557	6.90037e+06	581804	6.96016e+06	598063	6.98493e+06
17	5	961	-277.824	36.8914	16.8596	2.88214	0.431478	0.314358	0.602014	15.0201	23.3471	547405	6.96814e+06	584245	6.9662e+06	601082	6.96531e+06
17	5	962	-265.14	74.2927	19.6662	2.49437	0.204479	0.117583	0.52567	15.8192	24.0861	511365	6.98484e+06	583515	6.96713e+06	602614	6.96244e+06
17	5	963	-267.417	36.3653	20.0124	2.63314	0.421324	0.316946	0.575636	14.6726	22.5008	549663	6.95475e+06	583445	6.96821e+06	602036	6.97561e+06
17	5	964	-268.001	34.5182	18.559	2.77618	0.444837	0.347293	0.576012	14.7211	22.523	548929	6.96725e+06	583387	6.96929e+06	601914	6.97039e+06
17	5	965	-298.99	73.0137	20.638	2.50818	0.234624	0.136338	0.454091	22.5839	27.0824	520514	7.00534e+06	584793	6.97071e+06	602962	6.96092e+06
17	5	966	-252.003	42.7724	20.2646	2.09735	0.337567	0.247142	0.505803	14.9525	23.8964	547081	6.94656e+06	582059	6.97118e+06	598631	6.98284e+06
17	5	967	-241.902	89.5169	30.7624	0.700991	0.15483	0.103678	0.30104	23.2009	46.5423	546307	6.88981e+06	581455	6.97213e+06	593534	7.00043e+06
17	5	968	-251.314	35.7984	20.384	2.47904	0.402224	0.314277	0.540426	13.9214	19.8256	546224	6.96976e+06	581845	6.97332e+06	602128	6.97535e+06
17	5	969	-251.059	74.0982	20.8728	2.37001	0.194129	0.116161	0.50365	14.9091	19.3094	507602	6.97855e+06	581581	6.97436e+06	602420	6.97317e+06
17	5	970	-253.304	67.5998	18.7142	2.61869	0.214693	0.130508	0.511989	14.9174	19.8056	514234	6.97032e+06	581547	6.97654e+06	600182	6.97826e+06
17	5	971	-258.093	74.9076	20.2661	2.67191	0.197411	0.116224	0.502332	15.7505	19.5499	506992	6.98202e+06	581774	6.97769e+06	602006	6.97651e+06
17	5	972	-257.983	74.7039	18.9979	2.72986	0.197865	0.116963	0.496577	15.9203	19.9688	507008	6.98197e+06	581643	6.97875e+06	600623	6.97793e+06
17	5	973	-274.287	70.5099	18.6484	2.81356	0.222883	0.129137	0.511913	17.2681	20.9954	511895	6.98737e+06	582012	6.97993e+06	600557	6.97797e+06
17	5	974	-289.448	66.1142	21.2197	2.591	0.250839	0.150938	0.47214	20.5627	33.2537	520551	7.00416e+06	582532	6.98115e+06	602426	6.97377e+06
17	5	975	-266.708	66.2148	20.0337	3.37526	0.230781	0.136501	0.530467	15.8454	19.5185	517052	6.96693e+06	581526	6.98201e+06	601033	6.98658e+06
17	5	976	-263.863	37.586	25.115	2.89927	0.402225	0.329435	0.493106	16.7156	25.6309	551537	6.95976e+06	581071	6.98301e+06	600806	6.99854e+06
17	5	977	-274.487	69.8384	16.2867	3.52379	0.225189	0.132629	0.491782	17.9982	21.1103	511959	6.98901e+06	581701	6.98534e+06	597965	6.98449e+06
17	5	978	-272.368	69.2275	18.8215	3.43698	0.225423	0.133186	0.495894	17.6042	20.6443	511958	6.98819e+06	581161	6.98632e+06	599975	6.98581e+06
17	5	979	-298.973	64.2631	16.8899	3.52505	0.266557	0.160064	0.481223	21.3086	32.3826	520513	7.00513e+06	582362	6.98769e+06	598618	6.9831e+06
17	5	980	-280.59	75.6246	18.6818	3.64979	0.212584	0.122035	0.477122	19.2842	30.5588	506718	6.99983e+06	581502	6.98859e+06	599976	6.98581e+06
17	5	981	-289.978	72.0575	20.3555	4.83194	0.230572	0.128338	0.526874	18.484	21.6183	511426	6.97485e+06	581919	6.98978e+06	601833	6.994e+06
17	5	982	-284.851	69.4827	21.4672	4.3805	0.234888	0.135418	0.504804	18.7102	28.5146	511992	6.98958e+06	581465	6.99077e+06	602929	6.99114e+06
17	5	983	-294.493	69.9451	20.3449	5.18021	0.241234	0.135798	0.517606	19.3148	29.121	511948	6.98872e+06	581819	6.99195e+06	602142	6.99288e+06
17	5	984	-295.373	75.293	21.3549	4.8777	0.224769	0.124376	0.502067	20.013	30.4539	506666	6.99967e+06	581664	6.99301e+06	602935	6.99112e+06
17	5	985	-294.344	70.501	20.0286	7.69313	0.23921	0.134326	0.517129	19.3161	28.9661	511596	6.98534e+06	581553	6.99408e+06	601427	6.99656e+06
17	5	986	-286.375	76.7086	19.9949	7.70991	0.213901	0.121436	0.474471	20.0906	30.4068	505023	6.99692e+06	581713	6.99521e+06	601703	6.99476e+06
17	5	987	-290.31	75.6684	20.0847	7.96034	0.21982	0.124792	0.474308	20.5728	30.5313	506006	6.99891e+06	581630	6.99629e+06	601702	6.99559e+06
17	5	988	-282.076	66.4837	15.5666	5.87491	0.243092	0.14686	0.472157	19.6673	22.9133	524578	6.96104e+06	579803	6.99806e+06	592733	7.00673e+06
17	5	989	-280.043	70.4639	14.8818	6.78229	0.227708	0.134622	0.472869	19.3914	22.9165	519009	6.96381e+06	579945	6.99919e+06	592815	7.00666e+06
17	5	990	-276.614	59.7179	13.3219	6.73998	0.265392	0.175641	0.436163	20.5729	29.4451	520516	7.00557e+06	580001	7.0003e+06	593271	6.99912e+06
17	5	991	-279.659	59.6819	13.5239	6.16159	0.268476	0.176183	0.442825	20.6573	29.4165	520512	7.00507e+06	580082	7.00141e+06	593580	7.00058e+06
17	5	992	-264.732	59.8994	13.5052	6.47113	0.253223	0.175811	0.398823	20.7921	29.3564	520287	7.00672e+06	580064	7.00289e+06	593542	7.00203e+06
17	5	993	-263.912	59.5046	12.9353	7.23082	0.254114	0.177357	0.397595	20.7383	29.2384	520513	7.00515e+06	580006	7.00396e+06	592938	7.0037e+06
17	5	994	-265.495	60.8479	12.5145	8.95505	0.249995	0.171131	0.403272	20.6712	29.2347	519180	7.00256e+06	579977	7.00503e+06	592482	7.00554e+06
17	5	995	-281.658	73.468	10.7699	9.56568	0.219657	0.128449	0.464479	19.9409	30.6652	512781	6.97423e+06	578968	7.00612e+06	588671	7.01079e+06
17	5	996	-283.089	71.427	14.1847	8.3643	0.227081	0.134683	0.458549	20.3776	30.9596	517433	6.97044e+06	578683	7.00719e+06	590847	7.01449e+06
17	5	997	-277.891	73.7985	9.04916	10.9318	0.215749	0.127448	0.455704	19.8513	28.1617	505573	6.99812e+06	578671	7.00826e+06	587635	7.0095e+06
17	5	998	-288.76	60.4593	8.7663	11.1551	0.273648	0.17266	0.468495	20.6384	27.5889	518262	7.01021e+06	578715	7.00932e+06	587480	7.0092e+06
17	5	999	-291.941	60.912	9.4642	10.1999	0.274607	0.171176	0.474853	20.7459	27.4819	517779	7.01089e+06	578689	7.01039e+06	588153	7.01032e+06
17	5	1000	-294.874	60.2242	10.7089	9.1045	0.280534	0.174615	0.480562	20.8492	27.4555	518455	7.00988e+06	578659	7.01146e+06	589364	7.01174e+06
17	5	1001	-283.069	69.379	12.9286	6.92431	0.233768	0.139398	0.465839	20.0562	28.6273	511996	6.99114e+06	577992	7.01254e+06	590291	7.01653e+06
17	5	1002	-284.248	72.0318	13.4865	6.40352	0.226097	0.133134	0.461557	20.3887	29.6679	511560	6.98516e+06	577733	7.01361e+06	590123	7.01894e+06
18	5	1003	-290.441	58.1742	12.9152	6.69773	0.286053	0.180671	0.485379	20.119	26.9438	520447	7.00374e+06	577582	7.01468e+06	590266	7.01711e+06
18	5	1004	-294.504	58.6788	12.91	6.77076	0.287561	0.182352	0.476682	20.9744	26.589	519236	7.00852e+06	577468	7.01575e+06	590279	7.01734e+06
18	5	1005	-289.624	57.7152	13.0947	7.0092	0.287517	0.186575	0.465797	20.8642	26.5073	520476	7.00604e+06	577174	7.01683e+06	590038	7.01927e+06
18	5	1006	-291.079	69.936	14.4057	5.75288	0.238468	0.137898	0.488215	20.077	27.5006	511666	6.99195e+06	576608	7.0179e+06	589986	7.02325e+06
18	5	1007	-278.956	76.916	15.0347	5.39193	0.207797	0.121763	0.445349	20.4498	30.4002	513381	6.97366e+06	574720	7.02007e+06	586710	7.02914e+06
18	5	1008	-282.178	78.3595	15.2109	5.90701	0.206325	0.117199	0.471807	19.6943	27.2826	507213	6.98132e+06	574699	7.02114e+06	587800	7.02887e+06
18	5	1009	-273.623	57.0331	16.2891	5.24663	0.274881	0.179687	0.46894	18.7695	23.8195	518606	7.00964e+06	574235	7.02222e+06	590123	7.02581e+06
18	5	1010	-248.005	76.0072	15.1879	5.98812	0.186951	0.122017	0.37307	19.6587	29.1734	515400	6.97351e+06	572820	7.02331e+06	584294	7.03326e+06
18	5	1011	-240.275	56.245	14.7477	6.38555	0.244762	0.175538	0.403532	17.077	22.1078	517973	7.01065e+06	572235	7.02545e+06	586463	7.02933e+06
18	5	1012	-238.364	55.3067	13.9788	6.35683	0.246935	0.178342	0.404768	16.7545	21.769	519325	7.00842e+06	571584	7.02653e+06	584793	7.03111e+06
18	5	1013	-247.181	55.9556	13.7546	6.62102	0.2531	0.175653	0.433396	16.8133	21.7849	518430	7.00992e+06	571520	7.0276e+06	584570	7.03195e+06
18	5	1014	-261.588	58.0519	14.9679	6.21656	0.25818	0.16322	0.509305	15.928	21.224	513495	7.02602e+06	571487	7.02867e+06	586439	7.02935e+06
18	5	1015	-245.25	55.839	13.8665	6.66765	0.251646	0.175395	0.431281	16.6391	21.9719	520522	7.00473e+06	570440	7.02975e+06	582836	7.03597e+06
18	5	1016	-251.097	55.6814	13.5134	7.03426	0.258375	0.175362	0.455935	16.4742	21.6411	520198	7.00686e+06	570460	7.03082e+06	582659	7.03664e+06
18	5	1017	-253.58	57.0624	13.341	7.11516	0.254615	0.163147	0.512974	14.9196	21.3637	513619	7.02536e+06	570172	7.03296e+06	583394	7.03474e+06
18	5	1018	-242.658	56.0421	15.4468	5.96817	0.248085	0.162745	0.509425	13.7952	21.7967	513640	7.04118e+06	569226	7.03405e+06	584547	7.03208e+06
18	5	1019	-243.075	56.7214	19.1723	6.96981	0.245535	0.165432	0.465118	15.1607	20.7783	517968	7.01065e+06	569143	7.03512e+06	586441	7.04338e+06
18	5	1020	-238.512	55.9511	19.7099	6.81056	0.244242	0.16302	0.492908	13.7755	20.5691	515408	7.01858e+06	568513	7.03619e+06	587220	7.0424e+06
18	5	1021	-236.356	56.6255	18.6229	7.05892	0.239152	0.161364	0.475607	14.0169	20.7871	516794	7.0134e+06	568143	7.03727e+06	585030	7.04512e+06
18	5	1022	-260.343	63.4424	16.2281	6.2431	0.235119	0.139994	0.561132	14.3296	21.8315	510124	7.06111e+06	569331	7.03832e+06	584475	7.03249e+06
18	5	1023	-252.236	62.4082	15.6708	6.34686	0.231571	0.140973	0.555583	13.6367	21.0881	509986	7.06002e+06	568887	7.03939e+06	583677	7.03421e+06
18	5	1024	-252.822	56.5891	17.8494	8.2988	0.255978	0.158124	0.580573	13.1076	21.5813	513066	7.03189e+06	569003	7.04046e+06	586646	7.04316e+06
18	5	1025	-251.594	55.4209	14.6721	8.32906	0.260103	0.163034	0.569069	13.2489	20.0141	513566	7.04335e+06	568957	7.04153e+06	583621	7.04105e+06
18	5	1026	-251.744	55.0964	17.1265	6.68208	0.261792	0.164228	0.57049	13.231	20.9989	513906	7.03832e+06	568836	7.0426e+06	585911	7.04393e+06
18	5	1027	-246.477	57.1717	17.2531	4.85667	0.24701	0.156228	0.550538	13.1623	20.8743	513072	7.02926e+06	568398	7.04367e+06	585095	7.04802e+06
18	5	1028	-249.839	56.596	16.9157	4.7668	0.252927	0.157502	0.574757	12.9429	20.7661	513060	7.03275e+06	568371	7.04474e+06	584903	7.04833e+06
18	5	1029	-251.732	54.7163	16.9768	4.91619	0.263598	0.162835	0.604141	12.4928	19.4235	513645	7.04294e+06	568286	7.04581e+06	585240	7.0467e+06
18	5	1030	-257.406	58.9327	16.9167	5.13924	0.250255	0.148383	0.624962	12.5967	18.905	510355	7.05532e+06	568680	7.04687e+06	585422	7.04445e+06
18	5	1031	-189.742	81.1511	23.2259	3.53237	0.133965	0.0990628	0.340195	11.7458	19.6277	515475	7.12285e+06	574240	7.06688e+06	591059	7.05086e+06
18	5	1032	-164.13	63.8531	19.8756	2.24005	0.147275	0.129982	0.230757	10.9573	18.6306	510957	7.07567e+06	574467	7.06906e+06	594235	7.067e+06
18	5	1033	-178.276	82.8964	19.1194	3.83055	0.12322	0.0972733	0.273367	12.2142	21.8767	517163	7.12643e+06	578785	7.07098e+06	592997	7.05819e+06
18	5	1034	-169.901	82.3607	16.9472	4.14316	0.118195	0.0980462	0.23367	12.2357	22.5934	516210	7.12458e+06	580218	7.07275e+06	593389	7.06209e+06
18	5	1035	-156.562	73.9998	12.8102	6.73536	0.121221	0.114144	0.152188	13.7649	21.8599	507078	7.08464e+06	580288	7.07386e+06	592961	7.07199e+06
18	5	1036	-157.696	78.232	13.9311	6.43099	0.115494	0.103795	0.180118	11.9912	21.5815	511058	7.10938e+06	581174	7.07469e+06	593660	7.06851e+06
18	5	1037	-154.422	79.9533	14.6438	6.18216	0.110661	0.100021	0.175894	11.2127	22.4182	514276	7.11902e+06	581481	7.07571e+06	593790	7.06778e+06
18	5	1038	-158.435	77.9671	11.9866	8.03299	0.116429	0.103245	0.193621	11.3734	21.4547	510691	7.10809e+06	582039	7.07665e+06	593008	7.07181e+06
18	5	1039	-142.626	74.8962	11.9198	7.89528	0.109109	0.108282	0.113717	11.4002	21.7486	507057	7.08473e+06	581734	7.07901e+06	593619	7.07809e+06
18	5	1040	-140.271	71.7907	13.9156	7.46041	0.111949	0.115985	0.0928301	12.5115	23.0738	510319	7.07188e+06	581630	7.08017e+06	595453	7.08178e+06
18	5	1041	-150.392	77.1178	11.1194	8.90911	0.111736	0.0990682	0.225667	7.71629	20.6662	511845	7.11168e+06	582588	7.08097e+06	592788	7.07655e+06
18	5	1042	-145.428	78.1315	11.4498	8.50544	0.106646	0.095008	0.252758	5.76412	19.3181	514705	7.12055e+06	582701	7.08206e+06	592666	7.07642e+06
18	5	1043	-141.216	76.927	12.7187	7.56027	0.105178	0.0993378	0.157584	7.71381	20.5731	506219	7.09048e+06	582797	7.08316e+06	595458	7.08195e+06
18	5	1044	-162.532	96.7398	11.9023	8.59376	0.0962622	0.0733184	0.822077	2.96412	17.1502	507619	7.14408e+06	584178	7.08495e+06	593597	7.07767e+06
18	5	1045	-175.191	80.0679	10.5646	9.68637	0.125364	0.0900862	0.843936	3.74669	18.0952	517474	7.12786e+06	585498	7.08563e+06	594473	7.08005e+06
18	5	1046	-148.154	77.6356	9.68351	11.1519	0.109339	0.0911276	0.737686	2.18658	21.2776	506805	7.09171e+06	584308	7.08716e+06	593975	7.08659e+06
19	6	1047	-139.494	82.7225	27.6321	6.36357	0.0966174	0.0847805	0.687347	1.62493	32.7104	513606	7.04457e+06	583705	7.08849e+06	607120	7.10316e+06
19	6	1048	-122.966	81.6723	26.9225	5.27624	0.0862645	0.0844901	0.573949	0.29607	26.9517	509956	7.05322e+06	582944	7.08987e+06	607004	7.10195e+06
19	6	1049	-108.875	80.0342	26.8471	4.05034	0.0779426	0.0851132	0.853966	-0.746361	24.7276	509473	7.05843e+06	582514	7.09115e+06	607015	7.10212e+06
19	6	1050	-97.5308	74.5783	25.069	4.44009	0.0749294	0.0908624	1.17986	-1.09098	20.3274	510336	7.07265e+06	582263	7.09236e+06	606441	7.09898e+06
19	6	1051	-99.9347	75.7574	23.8251	3.77638	0.0755812	0.0891713	0.853516	-1.34686	15.2774	506780	7.08717e+06	582167	7.09465e+06	605876	7.097e+06
19	6	1052	-125.771	88.2972	11.3276	8.28296	0.0816124	0.0781882	0.91316	0.362068	11.301	507978	7.1402e+06	583933	7.09518e+06	593677	7.0894e+06
19	6	1053	-94.0483	73.507	23.1809	2.56623	0.0733069	0.0915895	0.95218	-1.56145	10.0454	508850	7.10038e+06	582273	7.09687e+06	605428	7.09576e+06
19	6	1054	-125.508	73.8211	20.7548	1.95205	0.0974123	0.0936638	0.760363	0.415033	10.8604	512174	7.11264e+06	584381	7.09728e+06	604681	7.09296e+06
19	6	1055	-94.0416	73.0465	23.7243	1.6265	0.0737637	0.0923074	1.03407	-1.43814	8.63803	509470	7.10322e+06	582399	7.09908e+06	606085	7.09773e+06
19	6	1056	-95.8242	84.4554	27.0143	1.41055	0.0650085	0.0802114	1.09767	-1.26176	22.5696	509893	7.05734e+06	582729	7.10009e+06	606027	7.11377e+06
19	6	1057	-97.717	71.3493	23.3554	1.65056	0.0784698	0.095028	1.27281	-1.00291	4.39626	512991	7.11575e+06	582838	7.10118e+06	605702	7.09642e+06
19	6	1058	-95.8488	73.7084	24.362	1.65114	0.0745062	0.0920075	1.35754	-1.01913	3.83542	508996	7.10131e+06	582697	7.10236e+06	607057	7.10271e+06
19	6	1059	-92.5253	76.2765	24.4802	1.64287	0.0695011	0.0885551	1.15369	-1.3643	2.90092	506949	7.09314e+06	582512	7.10355e+06	606763	7.10689e+06
19	6	1060	-97.3951	72.9025	24.5128	1.65283	0.076545	0.0928527	1.13132	-1.14467	2.32713	509797	7.10468e+06	582699	7.10461e+06	607212	7.10459e+06
19	6	1061	-89.6583	72.854	24.39	1.67504	0.0705115	0.0926336	1.27023	-1.36839	1.22867	509623	7.10379e+06	582448	7.10583e+06	606829	7.10651e+06
19	6	1062	-86.8971	74.8539	24.6942	1.67416	0.066514	0.090084	1.29081	-1.46911	0.7685	508122	7.09776e+06	582407	7.10697e+06	606914	7.11001e+06
19	6	1063	-88.5607	71.2045	24.2333	1.68821	0.0712617	0.0948807	1.42935	-1.25999	0.742953	511399	7.11102e+06	582541	7.10805e+06	606753	7.10704e+06
19	6	1064	-95.5768	68.7635	24.8384	1.66054	0.0796373	0.0986964	1.55532	-0.899494	1.20586	515251	7.1219e+06	582809	7.10909e+06	607213	7.10446e+06
19	6	1065	-92.5451	70.4923	24.3003	1.70253	0.0752202	0.0961084	1.50273	-1.04655	0.965955	512158	7.11256e+06	582614	7.11028e+06	606901	7.10949e+06
19	6	1066	-89.9928	74.6232	19.7317	1.69098	0.0690965	0.0907745	1.53568	-1.11929	0.776457	508715	7.0999e+06	582436	7.11147e+06	601929	7.11453e+06
19	6	1067	-93.1668	72.2662	19.6519	1.69419	0.0738666	0.0937564	1.44016	-1.06731	1.10901	510430	7.10612e+06	582404	7.11261e+06	601976	7.11437e+06
19	6	1068	-96.2417	71.2443	19.5486	1.65482	0.077399	0.0952534	1.45284	-0.936762	1.09073	511175	7.10975e+06	582306	7.11377e+06	601823	7.11487e+06
19	6	1069	-85.9474	78.3854	19.5628	1.50167	0.0628232	0.0861146	1.34004	-1.45571	0.742743	506807	7.09172e+06	581615	7.11513e+06	600284	7.12097e+06
19	6	1070	-97.2431	69.6355	19.1993	1.62987	0.0800111	0.0974207	1.38729	-0.939684	1.7985	512586	7.11375e+06	582137	7.11718e+06	601313	7.11813e+06
19	6	1071	-195.655	84.5473	13.8503	6.82745	0.132591	0.0860365	0.935382	4.63374	7.71901	507074	7.09384e+06	587131	7.12102e+06	600246	7.12548e+06
19	6	1072	-213.744	80.5552	13.4258	7.52507	0.152027	0.0928197	0.828611	6.48162	8.34151	507912	7.14065e+06	587562	7.12861e+06	600837	7.1266e+06
19	6	1073	-206.532	84.7471	17.1056	6.05268	0.139632	0.0879296	0.756427	6.55403	9.96884	508217	7.09836e+06	586989	7.12962e+06	602888	7.13593e+06
19	6	1074	-218.157	80.2436	13.2478	8.31397	0.155769	0.0939216	0.798912	7.03909	9.02605	508048	7.13963e+06	587804	7.13079e+06	600971	7.12933e+06
19	6	1075	-222.225	107.488	13.944	7.39866	0.118456	0.0689832	0.749072	7.81863	10.0497	488114	7.17185e+06	587896	7.13188e+06	600840	7.1267e+06
19	6	1076	-193.276	112.043	23.9805	1.40275	0.0988362	0.0656065	0.579559	7.2439	11.224	513692	7.04671e+06	585559	7.13267e+06	600941	7.15107e+06
19	6	1077	-192.944	112.38	24.7882	1.52342	0.0983701	0.0651465	0.61088	6.8413	11.8309	513788	7.04735e+06	585640	7.13376e+06	601489	7.15282e+06
19	6	1078	-213.528	99.1416	15.8534	6.13105	0.123402	0.0740865	0.845432	6.33803	8.44684	490175	7.16009e+06	586616	7.1371e+06	602037	7.13343e+06
19	6	1079	-208.558	88.7369	16.784	5.90876	0.134662	0.0829327	0.869894	5.83248	7.92301	498298	7.15004e+06	586233	7.13813e+06	602865	7.13588e+06
19	6	1080	-204.788	76.018	15.1725	6.11158	0.154351	0.0981755	0.811587	5.98537	8.12065	513443	7.11639e+06	585965	7.13918e+06	600439	7.14373e+06
19	6	1081	-202.552	75.2082	14.4878	5.95189	0.15431	0.0989801	0.823274	5.74483	7.72768	511160	7.13313e+06	586030	7.14026e+06	600453	7.14163e+06
19	6	1082	-206.859	78.6295	18.126	5.81913	0.150734	0.094457	0.852119	5.83991	7.78484	507479	7.1444e+06	586049	7.14134e+06	604161	7.14063e+06
20	6	1083	-90.5346	112.364	39.4048	0.742263	0.0461647	0.0604244	1.18649	-1.42269	0.693228	510192	7.05596e+06	579014	7.14478e+06	603149	7.17593e+06
20	6	1084	-87.4696	70.9932	24.3361	2.08866	0.0705932	0.0948502	1.24681	-1.49467	0.522717	513567	7.11689e+06	578416	7.14578e+06	600646	7.15569e+06
20	6	1085	-75.3785	80.7559	29.4459	0.918634	0.0534805	0.0829551	1.20228	-2.12617	-0.26768	509577	7.10348e+06	577746	7.14678e+06	602602	7.16256e+06
20	6	1086	-74.6069	65.5168	24.767	1.06953	0.0652452	0.101914	1.33567	-1.94687	-0.243912	516337	7.12473e+06	577641	7.14784e+06	600815	7.15658e+06
20	6	1087	-80.145	76.738	23.0873	2.06863	0.0598395	0.087516	1.25131	-1.82461	-0.0110678	501006	7.14471e+06	577629	7.14892e+06	600681	7.15018e+06
20	6	1088	-73.8324	78.3416	23.8227	1.17162	0.0539979	0.0855821	1.32476	-1.99639	-0.35755	499235	7.14846e+06	577534	7.15106e+06	601344	7.15185e+06
20	6	1089	-59.8913	83.8403	23.7312	1.24622	0.0409293	0.0801521	1.77443	-1.94027	-0.641966	493823	7.15296e+06	577660	7.15215e+06	601390	7.15192e+06
20	6	1090	-72.8444	88.5339	23.0489	1.17465	0.0471421	0.0762948	1.70574	-1.58349	-0.246479	490112	7.16522e+06	577833	7.15325e+06	600670	7.15013e+06
20	6	1091	-85.0743	70.3979	25.5563	1.09256	0.0692406	0.0954616	1.23075	-1.62567	0.301603	507857	7.14246e+06	577074	7.1553e+06	602202	7.15997e+06
20	6	1092	-93.4613	79.8092	23.5854	1.1949	0.0670967	0.0850356	1.4548	-1.04498	0.839947	498005	7.15053e+06	577595	7.15644e+06	601116	7.15819e+06
20	6	1093	-90.8974	88.5371	24.688	1.18663	0.0588232	0.0766664	1.45787	-1.14351	0.704621	490919	7.17583e+06	577541	7.15751e+06	601695	7.15241e+06
20	6	1094	-87.9124	79.8542	25.0331	1.25697	0.0630776	0.0846973	1.38931	-1.32305	0.492504	497926	7.15061e+06	577382	7.15857e+06	602290	7.16107e+06
20	6	1095	-81.3365	71.6995	30.5883	1.20621	0.0649968	0.0939305	1.47836	-1.49812	0.121923	508741	7.13721e+06	576862	7.15958e+06	605923	7.16913e+06
20	6	1096	-77.834	69.4619	31.3874	1.1143	0.0642015	0.0962011	1.20296	-2.00803	-0.118086	513581	7.13101e+06	576424	7.16061e+06	604821	7.17398e+06
20	6	1097	-77.145	70.9166	30.5815	1.23065	0.0623279	0.0943362	1.24858	-1.96624	-0.137682	507634	7.14405e+06	576327	7.16167e+06	605949	7.16927e+06
20	6	1098	-78.1816	84.4557	27.6096	1.25971	0.0530394	0.0796969	1.32003	-1.81481	-0.0549197	492153	7.15463e+06	576219	7.16273e+06	603701	7.16538e+06
20	6	1099	-82.3682	85.1283	27.8577	1.24212	0.0554381	0.0793416	1.41035	-1.52849	0.085576	491267	7.15764e+06	576172	7.1638e+06	603956	7.16582e+06
20	6	1100	-72.3167	78.3797	30.8156	1.18183	0.0528636	0.0857278	1.49944	-1.82163	-0.451899	499056	7.14881e+06	575781	7.16483e+06	605945	7.17113e+06
20	6	1101	-65.7329	71.9898	29.4159	1.11847	0.0523159	0.092401	1.28491	-2.41944	-0.817331	507909	7.14083e+06	575408	7.16586e+06	602989	7.17609e+06
20	6	1102	-65.3078	71.271	21.1071	1.09305	0.0525019	0.0931634	1.23873	-2.52931	-0.910974	507821	7.14325e+06	575055	7.1669e+06	594966	7.1739e+06
20	6	1103	-63.8558	78.2747	20.9645	1.11239	0.0467414	0.0852168	1.33586	-2.40762	-0.954547	499849	7.14531e+06	574782	7.16794e+06	594851	7.174e+06
20	6	1104	-66.193	85.2126	31.0775	1.15523	0.0445073	0.0788892	1.5878	-1.94113	-0.61175	489821	7.16588e+06	574976	7.16904e+06	606032	7.17019e+06
20	6	1105	-73.2308	86.7162	31.17	1.10744	0.0483856	0.0775705	1.39602	-1.91913	-0.399227	488124	7.17179e+06	574824	7.1701e+06	605988	7.16949e+06
20	6	1106	-79.0085	85.4943	30.9986	1.46079	0.0529492	0.0789788	1.5046	-1.56061	-0.0566466	489652	7.17486e+06	575068	7.1712e+06	606038	7.16988e+06
20	6	1107	-70.2305	81.9486	31.1243	1.45801	0.0491028	0.0820476	1.54087	-1.85018	-0.49692	493107	7.17663e+06	574939	7.17226e+06	606019	7.1706e+06
20	6	1108	-68.1983	84.2592	30.4966	1.85739	0.0463745	0.0798786	1.6348	-1.81503	-0.45564	490908	7.17582e+06	575131	7.17336e+06	605615	7.17247e+06
20	6	1109	-74.0946	86.8308	19.7295	1.3255	0.0488917	0.0776959	1.58265	-1.66146	-0.25849	488111	7.17004e+06	574832	7.1744e+06	594536	7.17539e+06
20	6	1110	-75.6629	79.01	33.6056	1.16866	0.0548686	0.084767	1.20925	-2.10044	-0.362896	501789	7.14389e+06	574243	7.1754e+06	605060	7.18881e+06
20	6	1111	-91.1233	80.3122	19.3222	1.2788	0.0650086	0.0844095	1.44874	-1.14179	0.560438	495147	7.18466e+06	575052	7.17658e+06	594276	7.17464e+06
20	6	1112	-63.0794	81.7455	32.929	1.22499	0.0442126	0.0815235	1.25802	-2.592	-0.991907	496037	7.15151e+06	573550	7.17747e+06	604774	7.18793e+06
20	6	1113	-54.8217	72.2187	41.2415	1.21241	0.0434936	0.091552	1.29621	-2.88056	-1.12856	519167	7.13076e+06	573340	7.17852e+06	604276	7.2058e+06
20	6	1114	-58.6971	84.2481	29.5702	1.26701	0.0399189	0.0791877	1.36267	-2.5771	-0.929705	490265	7.16466e+06	573259	7.17914e+06	602389	7.18422e+06
20	6	1115	-74.5012	77.8855	26.8984	1.23948	0.0548061	0.0861204	1.33644	-1.95028	-0.340391	495409	7.17928e+06	573269	7.18128e+06	600158	7.18197e+06
20	6	1116	-73.2788	77.5956	28.4252	1.26969	0.0541083	0.0864992	1.41566	-1.89056	-0.285852	495601	7.17993e+06	573158	7.18236e+06	601569	7.18325e+06
20	6	1117	-72.5765	78.3268	28.1797	1.28945	0.0530894	0.0859608	1.63917	-1.6572	-0.193841	494977	7.18451e+06	573297	7.1835e+06	601475	7.18314e+06
20	6	1118	-71.2468	85.3946	32.5102	1.36258	0.0478032	0.07864	1.37217	-2.03532	-0.47263	488261	7.1729e+06	572866	7.18449e+06	605075	7.18891e+06
20	6	1119	-83.012	83.0207	29.9001	1.38755	0.0572898	0.0814436	1.51394	-1.3995	0.193753	490314	7.18686e+06	573328	7.18573e+06	603225	7.18532e+06
20	6	1120	-71.5882	83.6233	32.6449	1.32211	0.0490497	0.0803377	1.41556	-1.9591	-0.459237	489860	7.17412e+06	572544	7.18662e+06	604822	7.1915e+06
20	6	1121	-82.7789	84.2387	31.5621	1.37247	0.0563029	0.0802696	1.50541	-1.4163	0.168516	489876	7.17404e+06	572976	7.18785e+06	604111	7.19302e+06
20	6	1122	-82.9602	82.8024	30.3402	1.32706	0.0574049	0.081612	1.46977	-1.4436	0.211896	490768	7.19982e+06	572849	7.18892e+06	602925	7.18492e+06
20	6	1123	-67.3187	83.8132	35.0091	1.34937	0.04602	0.0796997	1.22966	-2.4543	-0.857946	501161	7.14457e+06	571770	7.18973e+06	601263	7.20859e+06
20	6	1124	-68.2928	85.7537	34.572	1.35855	0.0456294	0.0781559	1.3356	-2.21778	-0.71032	498002	7.14701e+06	571717	7.19082e+06	601435	7.20849e+06
20	6	1125	-69.496	79.3439	32.3165	1.39	0.0501844	0.0845908	1.49475	-1.93545	-0.475854	492406	7.18842e+06	571673	7.19192e+06	603958	7.19335e+06
20	6	1126	-64.9448	75.7912	35.3336	1.55	0.0490962	0.0885091	1.66859	-1.88994	-0.556392	496577	7.18068e+06	571369	7.19294e+06	606237	7.19866e+06
20	6	1127	-63.8557	83.7031	35.7106	1.48933	0.04371	0.0800813	1.49358	-2.15329	-0.614826	489891	7.17396e+06	571162	7.19399e+06	605835	7.20254e+06
20	6	1128	-64.9911	77.0733	35.7136	1.48039	0.0483139	0.0859863	1.09161	-2.88692	-0.636871	495554	7.17891e+06	570921	7.19504e+06	605844	7.20251e+06
20	6	1129	-68.285	88.4854	32.4961	1.44708	0.0442156	0.0756859	1.25694	-2.35698	-0.628744	490134	7.15837e+06	570241	7.19596e+06	599659	7.20976e+06
20	6	1130	-69.9092	81.6893	25.8045	1.16998	0.0490334	0.0822129	1.47831	-1.94097	-0.626963	507841	7.14308e+06	569359	7.19682e+06	588792	7.2138e+06
20	6	1131	-76.576	86.0111	33.3245	1.35905	0.0510107	0.0789971	2.42904	-1.02366	-0.0460729	488111	7.17032e+06	569552	7.19798e+06	601106	7.2087e+06
20	6	1132	-61.2604	107.405	34.5238	1.38318	0.0326796	0.0632212	2.49575	-1.34765	-0.37618	463084	7.21254e+06	569648	7.19912e+06	603901	7.1948e+06
20	6	1133	-61.2216	78.4979	36.678	1.51851	0.0446858	0.085551	1.80108	-1.86924	-0.67025	491180	7.20295e+06	569630	7.20022e+06	606286	7.19894e+06
20	6	1134	-69.3358	106.507	36.4452	1.53921	0.0372993	0.0635373	1.70248	-1.70456	-0.40563	463757	7.21079e+06	569849	7.20139e+06	606152	7.19817e+06
20	6	1135	-70.0433	86.2359	36.463	1.53956	0.0465372	0.0782428	1.74706	-1.63785	-0.365413	483505	7.20513e+06	569699	7.20245e+06	606145	7.20132e+06
20	6	1136	-70.2057	87.7797	24.2971	1.62134	0.0458248	0.0767144	1.54614	-1.8448	-0.532607	488404	7.16857e+06	568994	7.20337e+06	591300	7.213e+06
20	6	1137	-69.1782	87.8548	21.5551	1.58084	0.0451156	0.0766444	1.57226	-1.85156	-0.528992	490202	7.16499e+06	568722	7.2044e+06	587986	7.21407e+06
20	6	1138	-67.7893	77.5522	30.2922	1.6504	0.0500829	0.0867995	1.80261	-1.65896	-0.53422	492193	7.19239e+06	568631	7.20548e+06	598488	7.2106e+06
20	6	1139	-61.7393	87.3437	20.2057	1.59003	0.0404998	0.0767134	1.46247	-2.28201	-1.21807	488122	7.17068e+06	567838	7.20637e+06	586279	7.21463e+06
20	6	1140	-63.705	84.6815	19.5538	1.5597	0.043103	0.0792164	1.52665	-2.11228	-0.955997	489670	7.17481e+06	567800	7.20747e+06	585841	7.21501e+06
20	6	1141	-74.36	104.88	36.6705	1.5911	0.0406228	0.0645247	1.55987	-1.67599	-0.325724	463582	7.21802e+06	568042	7.20864e+06	604565	7.20537e+06
20	6	1142	-78.1225	108.626	34.2427	1.52085	0.0412064	0.0624273	1.58862	-1.50998	-0.0413143	459406	7.21491e+06	567908	7.20971e+06	602111	7.20808e+06
20	6	1143	-76.3553	84.5763	24.5891	1.558	0.0517265	0.079943	1.74986	-1.42861	-0.269318	483511	7.20511e+06	567895	7.21082e+06	592428	7.21248e+06
20	6	1144	-78.9985	104.638	30.8633	1.5407	0.0432565	0.0648316	1.66176	-1.41329	-0.00451246	463527	7.21738e+06	568024	7.21196e+06	598846	7.21036e+06
20	6	1145	-56.2071	96.5458	25.4814	1.06954	0.0333565	0.0685979	0.99232	-3.68298	-1.70897	514490	7.13033e+06	565417	7.21236e+06	578858	7.234e+06
20	6	1146	-50.7677	93.6209	28.2628	1.1823	0.0310697	0.0706517	1.07359	-3.69438	-2.70465	519549	7.13181e+06	565369	7.21345e+06	579201	7.2381e+06
20	6	1147	-57.8079	113.206	33.4083	1.44804	0.0292579	0.0598599	2.15303	-1.65426	-0.648405	453446	7.22919e+06	565714	7.21465e+06	598846	7.21036e+06
20	6	1148	-48.367	103.087	19.6628	1.54187	0.0268823	0.0654583	2.10515	-1.94875	-1.34642	462283	7.21573e+06	565371	7.21567e+06	585033	7.21565e+06
20	6	1149	-63.7345	117.353	23.5139	1.49145	0.0311175	0.0580293	2.84924	-1.13052	-0.41545	450104	7.23493e+06	566072	7.21696e+06	589309	7.21336e+06
20	6	1150	-55.7393	102.303	17.932	1.51301	0.0312173	0.0659706	1.91923	-1.91769	-0.881727	463094	7.21249e+06	565256	7.21785e+06	583163	7.21879e+06
20	6	1151	-51.0662	90.8128	19.0036	1.38238	0.0322188	0.0741155	2.01999	-1.95446	-0.892693	488902	7.16904e+06	564840	7.21884e+06	580731	7.22926e+06
20	6	1152	-63.9136	96.7994	17.192	1.46301	0.0378306	0.0699938	2.24509	-1.43062	-0.426204	469021	7.20719e+06	564971	7.21999e+06	582012	7.22226e+06
20	6	1153	-61.7918	80.6201	16.5775	1.6638	0.0439147	0.0832896	1.72829	-1.92912	-0.825693	485632	7.20367e+06	564382	7.22093e+06	580575	7.22448e+06
20	6	1154	-56.1174	77.8234	19.3704	1.31667	0.0413152	0.0859709	1.70094	-2.15123	-0.960006	495295	7.18525e+06	563939	7.22192e+06	581024	7.23104e+06
20	6	1155	-53.9236	77.4466	19.0849	1.31361	0.0398932	0.0861178	1.5826	-2.39159	-1.02545	492247	7.19266e+06	563540	7.22292e+06	581109	7.23037e+06
20	6	1156	-56.6815	80.2278	18.8746	1.2799	0.0404799	0.0833285	1.5888	-2.28282	-0.950542	494461	7.18174e+06	562771	7.22381e+06	578841	7.23371e+06
20	6	1157	-63.2484	78.8394	21.5621	1.336	0.0459651	0.0855556	2.1334	-1.52345	-0.47134	492406	7.18819e+06	561726	7.22574e+06	580684	7.23601e+06
20	6	1158	-67.4755	109.656	19.8851	1.30848	0.0352563	0.0617222	1.73073	-1.7383	-0.539783	451958	7.23171e+06	561548	7.22791e+06	581421	7.22722e+06
20	6	1159	-61.3022	98.65	19.7516	1.26865	0.0356042	0.0683092	1.679	-2.00249	-0.685531	463301	7.21833e+06	561376	7.22897e+06	581012	7.2311e+06
20	6	1160	-65.9292	99.5287	19.2957	1.26378	0.0379535	0.0679915	1.94278	-1.59403	-0.408516	462396	7.219e+06	561308	7.23006e+06	580484	7.2322e+06
20	6	1161	-66.5956	76.089	19.8127	1.07684	0.0501471	0.0884075	1.81925	-1.68136	-0.612505	490667	7.20078e+06	560520	7.23095e+06	578709	7.23881e+06
20	6	1162	-63.3646	77.1356	19.9326	1.34435	0.0470668	0.0870919	1.79258	-1.80963	-0.689416	491699	7.19666e+06	559762	7.23296e+06	577350	7.24234e+06
20	6	1163	-62.2039	92.3922	19.0497	1.52724	0.0385749	0.0729553	1.78912	-1.85029	-0.703124	471444	7.20621e+06	559555	7.23401e+06	577722	7.23974e+06
20	6	1164	-62.5735	95.1999	20.0633	1.83571	0.0376597	0.0708833	1.83	-1.79736	-0.668788	467730	7.20811e+06	558239	7.23763e+06	577313	7.24385e+06
20	6	1165	-59.8582	92.9182	20.1609	2.53712	0.0369102	0.0726884	2.06209	-1.67033	-0.690527	470659	7.20652e+06	557855	7.23863e+06	576774	7.24559e+06
20	6	1166	-62.7654	97.4602	19.9197	2.34513	0.0368991	0.0696076	2.49272	-1.31472	-0.553981	464808	7.20981e+06	557579	7.23968e+06	576541	7.24578e+06
20	6	1167	-65.2832	97.4248	19.9298	2.17477	0.0383932	0.0695491	2.18626	-1.43328	-0.574049	463005	7.21627e+06	557310	7.24073e+06	576602	7.24573e+06
20	6	1168	-67.6519	92.4434	18.0812	2.64849	0.0419302	0.0733465	2.3122	-1.29647	-0.429925	471362	7.20626e+06	556761	7.24165e+06	573464	7.24857e+06
20	6	1169	-57.8839	79.0111	19.4083	2.13099	0.0419751	0.0846276	1.59343	-2.23297	-1.0111	491822	7.19647e+06	556043	7.2425e+06	571818	7.2538e+06
20	6	1170	-62.5792	102.922	18.6256	2.77446	0.0348373	0.0658712	2.25876	-1.45578	-0.484891	455242	7.22457e+06	556349	7.24381e+06	574646	7.2473e+06
20	6	1171	-55.1249	97.6233	18.784	2.64396	0.0323532	0.0690432	1.89657	-1.95917	-0.936017	463226	7.21217e+06	555332	7.24452e+06	573054	7.25075e+06
20	6	1172	-53.0784	77.2595	22.0461	1.31848	0.039363	0.0872083	2.4249	-1.58029	-0.699195	490283	7.2037e+06	555178	7.24563e+06	573696	7.25759e+06
20	6	1173	-55.0947	97.4703	21.2226	1.14187	0.0323862	0.0694532	2.43824	-1.52428	-0.601324	462041	7.21556e+06	553028	7.25052e+06	572839	7.25813e+06
20	6	1174	-57.0331	94.6768	19.5658	0.961837	0.0345148	0.0711583	1.85361	-1.94565	-1.02	468059	7.20801e+06	552243	7.25133e+06	569640	7.26028e+06
20	6	1175	-60.8243	80.3388	19.6337	1.17703	0.0433785	0.0834729	1.67041	-2.02918	-1.05488	487735	7.20366e+06	551705	7.25226e+06	567338	7.26414e+06
20	6	1176	-59.5748	100.644	21.4492	0.889676	0.0339154	0.0672826	2.24082	-1.54423	-0.608865	455131	7.22481e+06	551629	7.2534e+06	572195	7.25949e+06
20	6	1177	-48.1108	99.2723	18.9674	1.15919	0.0277675	0.068002	2.24359	-1.83494	-0.883624	457046	7.22227e+06	551012	7.25429e+06	568965	7.26041e+06
20	6	1178	-49.09	83.0817	21.3984	1.70059	0.033854	0.0806968	1.91592	-2.11978	-1.11052	482920	7.20664e+06	550358	7.25517e+06	567728	7.26766e+06
20	6	1179	-49.1869	96.2899	18.0536	2.48281	0.0292679	0.0701922	2.43914	-1.66241	-0.818224	461066	7.21985e+06	550203	7.25627e+06	566915	7.2631e+06
20	6	1180	-46.3551	102.14	18.0043	2.09454	0.0260031	0.0662693	2.61748	-1.61094	-0.750953	450322	7.23443e+06	549870	7.25729e+06	567417	7.26132e+06
20	6	1181	-59.042	100.212	18.8971	3.19438	0.0337571	0.0674663	2.05577	-1.69821	-0.736494	454648	7.226e+06	549511	7.2583e+06	567399	7.2644e+06
20	6	1182	-60.8336	99.4863	20.8372	2.39978	0.035035	0.0677569	1.70583	-1.9867	-0.795874	460082	7.21439e+06	548907	7.2592e+06	567511	7.26859e+06
20	6	1183	-54.1142	97.8229	20.059	2.72495	0.0316952	0.0687443	1.72125	-2.1925	-1.00969	463498	7.21166e+06	548447	7.26017e+06	565866	7.27011e+06
20	6	1184	-53.5385	102.143	18.7669	2.63387	0.0300318	0.0662373	2.29519	-1.65822	-0.746024	449206	7.2369e+06	548387	7.26131e+06	566609	7.2658e+06
20	6	1185	-49.0805	101.97	20.1811	2.92815	0.0275777	0.0662225	2.19052	-1.85409	-0.900866	449124	7.23698e+06	547909	7.26227e+06	567459	7.26728e+06
20	6	1186	-57.161	102.336	20.3956	3.42794	0.0320034	0.0659962	1.95119	-1.84452	-0.817179	448792	7.23769e+06	547841	7.26342e+06	567582	7.26854e+06
20	6	1187	-55.1887	101.456	19.9004	3.57872	0.031167	0.0665813	2.05263	-1.80833	-0.845774	448598	7.2414e+06	547414	7.26439e+06	566797	7.2689e+06
20	6	1188	-46.8284	98.4465	21.7336	4.28786	0.0272541	0.0684867	2.15439	-1.94508	-1.01333	458909	7.22114e+06	546882	7.26533e+06	566303	7.27508e+06
20	6	1189	-41.633	98.9388	23.3175	4.05609	0.0241098	0.0677452	1.7591	-2.55169	-1.45692	464954	7.20968e+06	546175	7.26618e+06	565317	7.27949e+06
20	6	1190	-47.9657	101.335	21.3509	4.48598	0.0271202	0.0664581	1.94559	-2.12053	-0.9877	450447	7.23412e+06	546178	7.26735e+06	566348	7.27436e+06
20	6	1191	-52.362	99.4829	19.241	4.2872	0.0301571	0.0675931	1.73275	-2.23586	-1.0704	448010	7.24989e+06	545767	7.26834e+06	564674	7.27191e+06
20	6	1192	-53.5219	100.39	21.9055	4.50431	0.0305467	0.0671521	1.90658	-1.99704	-1.13114	453194	7.22945e+06	545329	7.26931e+06	565433	7.27801e+06
20	6	1193	-52.4784	100.524	22.9063	4.48737	0.0299112	0.0668602	1.67417	-2.31015	-1.40078	455455	7.22414e+06	544786	7.27024e+06	565142	7.28074e+06
20	6	1194	-57.0499	99.2035	21.6313	4.64766	0.0329496	0.0680849	2.02482	-1.78054	-0.901088	447643	7.25189e+06	544896	7.27147e+06	566102	7.27574e+06
20	6	1195	-73.129	99.1748	21.4769	5.40476	0.0422485	0.0685759	2.47075	-1.08625	-0.25226	447773	7.25128e+06	544405	7.27359e+06	565331	7.27842e+06
20	6	1196	-50.9417	91.1918	24.6768	4.19084	0.0320066	0.0732355	1.47053	-2.6901	-1.92784	484419	7.20431e+06	543055	7.27415e+06	558921	7.29305e+06
20	6	1197	-23.7829	101.672	20.0335	4.11085	0.0134025	0.06656	3.38826	-1.62514	-1.04395	454822	7.22546e+06	543351	7.27546e+06	560794	7.28531e+06
20	6	1198	-35.1395	99.3888	21.9226	1.68877	0.0202572	0.0677284	2.28498	-2.12675	-1.6609	448541	7.24323e+06	541957	7.27717e+06	562562	7.28465e+06
20	6	1199	-66.0259	101.531	20.1265	5.87179	0.0372595	0.0670474	3.04255	-1.01546	-0.426231	449835	7.23579e+06	542007	7.27837e+06	560278	7.28681e+06
20	6	1200	-38.0298	97.5508	21.3284	5.25139	0.0223365	0.0696525	4.04017	-1.16053	-0.797398	447504	7.25268e+06	541368	7.27925e+06	561890	7.28506e+06
20	6	1201	-22.8287	98.3201	19.9601	5.76124	0.0133034	0.0694041	7.43545	-0.74457	-0.466353	448050	7.24933e+06	541328	7.28041e+06	560264	7.28672e+06
20	6	1202	-45.6169	101.456	20.774	5.41447	0.0257614	0.0671241	4.37061	-0.973221	-0.722719	449061	7.23709e+06	540439	7.28117e+06	559150	7.2902e+06
20	6	1203	-25.6755	100.041	23.446	5.54354	0.0147049	0.0680785	5.65579	-0.952445	-0.821409	461947	7.21948e+06	539949	7.28212e+06	558229	7.29681e+06
20	6	1204	-34.3702	100.385	21.6546	5.66203	0.0196173	0.0680791	8.01437	-0.608181	-0.43243	448656	7.24046e+06	539532	7.28311e+06	559135	7.29231e+06
20	6	1205	-25.5518	101.286	23.3453	5.75191	0.0144542	0.0674197	7.74763	-0.694207	-0.501267	454283	7.22804e+06	538756	7.28393e+06	558226	7.29681e+06
20	6	1206	-20.4395	103.79	24.3315	5.01866	0.0112833	0.0655682	5.31479	-1.07023	-0.846868	467753	7.20811e+06	537822	7.28467e+06	554248	7.30262e+06
20	6	1207	-70.4988	110.452	24.1458	4.01112	0.0365704	0.0615903	2.40145	-1.18035	-0.181546	426489	7.267e+06	535123	7.28696e+06	558871	7.29132e+06
20	6	1208	-70.7841	95.9945	24.503	4.26782	0.0422486	0.0707272	2.31604	-1.21687	-0.358889	448790	7.2438e+06	534162	7.28769e+06	555954	7.2989e+06
20	6	1209	-60.3355	99.4488	32.8642	4.05651	0.0347613	0.0679321	1.93892	-1.76244	-0.763214	462892	7.21856e+06	533522	7.28857e+06	556863	7.31171e+06
20	6	1210	-60.8454	95.4362	25.789	4.34681	0.036529	0.0712061	3.01946	-1.12145	-0.414079	448873	7.24482e+06	533158	7.28958e+06	555934	7.30168e+06
20	6	1211	-60.1589	99.2226	24.2349	4.06505	0.0347386	0.0685026	2.98965	-1.1458	-0.481157	450274	7.23454e+06	532303	7.29036e+06	552339	7.304e+06
	All	Mean	-158.935	44.7463	22.595	4.32792	0.249795	0.289795	0.699026	9.72446	18.9687
	All	Stddev	55.2874	22.0295	9.46168	2.76909	0.114724	0.210184	1.22968	10.3482	12.0908
	All	Median	-157.696	36.2866	20.9513	3.72505	0.249751	0.258778	0.469388	7.51326	19.6032
	All	IQR	69.6096	26.032	11.3915	4.26721	0.14566	0.185431	0.631796	14.6322	15.0272
	All	Max	-20.4395	117.353	59.3496	12.2598	0.62315	4.09846	32.4207	48.6513	63.722
	All	Min	-298.99	13.5217	8.06585	0.640037	0.0112833	0.0580293	0.00221269	-3.69438	-2.70465
		P-value	0.0862614	2.33831e-61	1.15512e-65	1.35684e-29	0.26223	0	0	4.24896e-54	3.32116e-09

## Sheet: Lengths
	Length (KM)									Length totals (KM)
Section	Shelf edge	coast	deep		Mean	1 std-dev				Shelf edge	coast	deep		Mean	1 std-dev	percentage
1	82.7628	44.996	100.64		76.1331	23.1954			Group 1	276.214	186.702	341.69		268.202	63.5269	0.180001
2	75.0424	99.6363	64.8662		79.8483	14.5959			Group 2	180.25	132.083	211.71		174.681	32.745	0.117235
3	64.9854	35.7901	80.1382		60.3046	18.4051			Group 3	143.166	163.013	142.709		149.629	9.46548	0.100422
4	81.7454	49.8619	107.875		79.8274	23.7225			Group 4	137.538	120.746	156.806		138.363	14.7327	0.0928614
5	69.9281	59.3377	73.6428		67.6362	6.06073			Group 5	143.084	137.027	171.774		150.629	15.1555	0.101093
6	111.168	110.672	99.3427		107.061	5.46143			Group 6	205.796	288.387	175.371		223.185	47.7489	0.149788
7	68.6855	25.5746	86.2107		60.1569	25.4786				Outliers/ ungrouped
8	71.0154	151.881	36.5628		86.4863	48.3326		seg	6	111.168	110.672	99.3427		107.061	5.46143	0.071853
9	72.1505	11.1323	106.146		63.1431	39.3088		seg	7	68.6855	25.5746	86.2107		60.1569	25.4786	0.0403738
10	28.5763	22.8835	30.1918		27.2172	3.13458		seg	11	74.8393	81.2017	69.3468		75.1293	4.84406	0.0504223
11	74.8393	81.2017	69.3468		75.1293	4.84406		seg	13	86.381	51.815	97.8332		78.6764	19.5608	0.0528029
12	80.8673	89.752	77.8605		82.8266	5.04852		seg	16	63.8694	8.20032	106.028		59.3659	40.0648	0.0398429
13	86.381	51.815	97.8332		78.6764	19.5608								totals
14	56.671	30.9944	78.9451		55.5368	19.5922							Grouped	1104.69		0.741402
15	53.4235	6.27917	96.0451		51.9159	36.6623							Outlier	380.389		0.255295
16	63.8694	8.20032	106.028		59.3659	40.0648
17	70.2996	48.0073	102.2		73.5024	22.2398										0.996697
18	72.7845	89.0199	69.5743		77.1262	8.51159
19	52.9029	100.023	37.59		63.5054	26.568
20	152.893	188.364	137.781		159.679	21.2005
Mean	74.5496	65.2711	82.9411		74.2539	20.5994
Total	1490.99	1305.42	1658.82		1485.08

## Sheet: Statistics
DATA		Shelf Break depth	Shelf Width	Slope Wdith (to the -2000 m)	Upper Slope angle	Shelf gradient	upper Shelf gradient	Lower Shelf gradient	Slope/Shelf gradient ratio	Slope/outer Shelf gradient ratio	Distance between the shelf break and the LGM sea-level	Distance between the shelf break and the mean sea-level					Shelf Break depth	Shelf Width	Slope Wdith (to the -2000 m)	Upper Slope angle	Shelf Slope	upper Shelf slope	Lower Shelf slope	Slope/Shelf gradient ratio	Slope/outer Shelf gradient ratio	Distance between the shelf break and the LGM sea-level	Distance between the shelf break and the mean sea-level
All	Mean	-158.935	44.7463	22.595	4.32792	0.249795	0.289795	0.699026	23.6209	21.6008	9.72446	18.9687			Group 1	Mean	-153.576	28.8731	14.517	7.93654	0.314946	0.375958	0.334363	26.2361	65.0789	8.06252	18.1276
All	Stddev	55.2874	22.0295	9.46168	2.76909	0.114724	0.210184	1.22968	32.8948	96.5346	10.3482	12.0908				Stddev	26.5892	7.0363	7.83142	2.07542	0.0651516	0.134832	0.42046	9.00231	219.857	4.5379	4.96035
All	Median	-157.696	36.2866	20.9513	3.72505	0.249751	0.258778	0.469388	17.6184	9.83708	7.51326	19.6032				Median	-150.82	28.218	12.1158	8.05433	0.313729	0.341258	0.206131	25.5215	40.2897	7.71987	19.6794
All	IQR	69.6096	26.032	11.3915	4.26721	0.14566	0.185431	0.631796	16.2731	20.7856	14.6322	15.0272				IQR	25.5114	6.40789	3.49054	2.44912	0.0863887	0.192628	0.203488	11.4752	32.0076	6.04059	7.37679
All	Max	-20.4395	117.353	59.3496	12.2598	0.62315	4.09846	32.4207	444.786	3157.61	48.6513	63.722				Max	-94.7529	79.6289	59.3496	12.2598	0.490666	0.787026	4.24302	59.0223	3157.61	18.4038	31.4733
All	Min	-298.99	13.5217	8.06585	0.640037	0.0112833	0.0580293	0.00221269	1.90017	0.21223	-3.69438	-2.70465				Min	-240.273	18.2266	8.84379	1.03649	0.12946	0.0943308	0.00221269	4.02582	1.78019	-0.997579	5.34583
	AD H0	TRUE	TRUE	TRUE	TRUE	TRUE	TRUE	TRUE	TRUE	TRUE	TRUE	TRUE				AD H0	TRUE	TRUE	TRUE	TRUE	FALSE	TRUE	TRUE	TRUE	TRUE	TRUE	TRUE
	JB H0	FALSE	TRUE	TRUE	TRUE	FALSE	TRUE	TRUE	TRUE	TRUE	TRUE	TRUE				JB H0	TRUE	TRUE	TRUE	TRUE	FALSE	TRUE	TRUE	TRUE	TRUE	TRUE	TRUE
Sec 01	Mean	-144.727	30.5565	10.9523	9.12597	0.273619	0.294066	0.258843	34.2238	74.1164	6.36313	21.1982			Group 2	Mean	-184.461	29.7739	22.4976	3.797	0.360461	0.522666	0.290664	10.7747	18.075	13.6717	20.3846
	Stddev	18.2632	3.23587	1.32781	1.47482	0.0408241	0.0602949	0.36901	8.00287	95.6019	2.79458	1.75044				Stddev	33.5491	4.9929	5.28864	1.50442	0.0637979	0.413488	0.162495	5.04793	13.5557	4.20625	4.35128
	Median	-141.942	30.6718	10.8899	9.03345	0.268921	0.286635	0.211139	33.4681	43.5349	6.50606	20.9843				Median	-186.306	30.8231	22.3692	4.03037	0.355902	0.399095	0.255188	10.0458	10.87	14.6487	20.7539
	IQR	30.1935	5.08602	0.856248	1.68444	0.0505143	0.0527903	0.180916	7.70234	40.6811	3.96375	2.89438				IQR	51.807	5.56959	6.89434	1.90984	0.0986995	0.123257	0.188654	5.37742	16.294	3.71016	6.10623
	Max	-114.187	36.7859	18.716	12.2598	0.4043	0.505571	3.09742	59.0223	497.739	11.7306	26.5562				Max	-114.815	39.6874	40.2941	9.9529	0.495654	4.09846	0.835148	35.3768	79.6305	21.5637	36.1692
	Min	-195.783	24.1914	8.84379	3.11294	0.20062	0.19848	0.0219309	9.52009	3.0319	-0.0307724	18.4739				Min	-251.376	17.5646	10.3046	0.640037	0.183856	0.18902	0.0492112	2.90802	1.28002	-0.594153	10.4281
	AD H0	TRUE	FALSE	TRUE	TRUE	TRUE	TRUE	TRUE	TRUE	TRUE	FALSE	TRUE				AD H0	TRUE	TRUE	FALSE	TRUE	TRUE	TRUE	TRUE	TRUE	TRUE	TRUE	TRUE
	JB H0	FALSE	FALSE	TRUE	TRUE	TRUE	TRUE	TRUE	TRUE	TRUE	FALSE	FALSE				JB H0	TRUE	TRUE	TRUE	TRUE	FALSE	TRUE	TRUE	TRUE	TRUE	TRUE	FALSE
Sec 02	Mean	-139.533	22.6394	13.0177	7.57089	0.36131	0.430058	0.375791	21.2317	101.21	5.66244	14.1023			Group 3	Mean	-182.848	42.9238	21.0062	3.18084	0.250895	0.227425	0.402074	13.606	13.1725	11.2273	29.9918
	Stddev	17.0696	4.19173	3.37004	2.14252	0.0632208	0.102013	0.613042	6.07775	417.369	3.05733	3.31633				Stddev	31.9333	7.1818	3.59003	0.868491	0.0637278	0.0545728	0.252477	4.99147	10.4102	6.25486	5.9863
	Median	-142.009	21.5106	12.3496	7.4289	0.371722	0.43489	0.221906	20.8636	35.6918	6.32638	14.6983				Median	-168.779	44.4887	20.1454	3.36706	0.229627	0.225112	0.325528	14.9064	10.7041	9.51325	29.0208
	IQR	16.3891	3.49395	2.39798	4.00217	0.0838532	0.159837	0.130666	9.76693	23.1067	4.22056	5.07857				IQR	44.608	9.27759	4.63186	1.3427	0.0591987	0.0622336	0.401332	7.81955	15.2777	7.49749	7.15646
	Max	-94.7529	37.5382	23.2409	10.6611	0.480459	0.60674	4.24302	34.0773	3157.61	11.9503	21.5156				Max	-140.166	70.2857	36.6227	4.98733	0.42263	0.57272	0.895776	23.7785	59.6352	41.5001	51.4079
	Min	-174.294	18.2266	10.02	2.73387	0.222633	0.239871	0.00221269	10.7454	2.30132	-0.997579	8.17318				Min	-256.593	30.612	14.619	0.975858	0.130146	0.123021	0.0491374	2.89508	1.66274	3.49353	20.5235
	AD H0	FALSE	TRUE	TRUE	TRUE	TRUE	FALSE	TRUE	FALSE	TRUE	TRUE	TRUE				AD H0	TRUE	TRUE	TRUE	TRUE	TRUE	TRUE	TRUE	TRUE	TRUE	TRUE	TRUE
	JB H0	FALSE	TRUE	TRUE	FALSE	FALSE	FALSE	TRUE	FALSE	TRUE	FALSE	FALSE				JB H0	TRUE	TRUE	TRUE	FALSE	TRUE	TRUE	TRUE	TRUE	TRUE	TRUE	TRUE
Sec 03	Mean	-155.017	28.6431	14.686	7.56599	0.312642	0.498534	0.149866	24.4221	53.0346	13.8893	22.1895			Group 4	Mean	-129.954	29.4292	17.1634	6.23852	0.259388	0.249832	1.31771	24.2362	8.99956	1.0277	10.5875
	Stddev	6.54121	2.93355	3.62993	1.37307	0.0286934	0.128702	0.0409202	4.93722	13.6779	2.89882	2.04295				Stddev	26.6004	5.37408	5.28556	2.54311	0.0615051	0.0423274	3.10273	9.13713	7.52241	1.85443	1.65394
	Median	-154.725	27.7896	13.2906	7.34274	0.317408	0.478697	0.138071	23.4668	53.9008	14.2097	22.0463				Median	-123.21	29.167	16.7629	6.25661	0.254474	0.256362	0.782637	23.3049	7.71822	0.357691	10.4125
	IQR	9.14043	2.12152	6.26445	1.2205	0.0306746	0.204038	0.0483442	5.31777	17.2147	3.63405	1.214				IQR	26.1418	5.23616	7.01832	2.64756	0.108037	0.0466444	0.473095	12.206	7.15521	1.97829	1.8868
	Max	-133.79	45.7745	22.9461	11.2379	0.357603	0.787026	0.320372	37.2883	97.9422	18.4038	31.4733				Max	-93.5446	48.4665	38.5361	12.187	0.404268	0.331275	32.4207	54.898	53.2932	6.16126	15.9362
	Min	-167.669	25.2616	9.58599	4.88101	0.187482	0.216516	0.0719541	15.0401	23.9212	7.81713	18.6309				Min	-212.386	21.1498	8.06585	1.41599	0.148023	0.148624	0.0568239	6.53679	0.21223	-1.20493	7.55019
	AD H0	FALSE	TRUE	TRUE	TRUE	TRUE	TRUE	TRUE	FALSE	FALSE	TRUE	TRUE				AD H0	TRUE	TRUE	TRUE	TRUE	TRUE	FALSE	TRUE	FALSE	TRUE	TRUE	TRUE
	JB H0	FALSE	TRUE	FALSE	TRUE	TRUE	FALSE	TRUE	FALSE	TRUE	FALSE	TRUE				JB H0	TRUE	TRUE	TRUE	FALSE	TRUE	FALSE	TRUE	TRUE	TRUE	TRUE	TRUE
Sec 04	Mean	-157.159	27.2704	20.3296	4.54605	0.343925	0.67698	0.168332	13.8815	30.398	13.0878	19.3936			Group 5	Mean	-248.656	62.1133	18.0764	5.53029	0.24699	0.167947	0.469152	26.9837	14.1587	15.7862	24.5219
	Stddev	11.0217	5.57661	3.67337	1.31394	0.0718212	0.597495	0.0610539	5.62121	12.6787	2.33826	3.84433				Stddev	43.133	14.2849	7.53389	2.36189	0.0841122	0.0671288	0.129261	19.8063	12.3236	4.19616	4.61175
	Median	-155.445	28.9911	20.4525	4.37105	0.309628	0.399358	0.162372	12.3716	28.3333	13.29	18.4851				Median	-257.406	60.9565	16.9472	5.75288	0.243238	0.150938	0.488215	24.0784	11.4776	15.8192	22.9165
	IQR	15.5925	10.2877	4.12376	0.489834	0.110907	0.49961	0.0705227	4.51063	14.2976	3.15345	6.83291				IQR	38.2989	18.0824	6.44293	3.48377	0.0614543	0.0530035	0.0828679	18.2322	8.42772	6.48334	6.72714
	Max	-132.984	36.5438	31.0293	9.9529	0.495654	4.09846	0.335433	35.3768	79.6305	18.8456	25.6166				Max	-140.271	96.7398	54.1349	11.1551	0.444837	0.357513	0.843936	101.994	80.3662	23.2009	46.5423
	Min	-186.054	17.5646	10.3046	1.56393	0.208501	0.315251	0.0492112	5.33613	10.2749	8.25471	13.2009				Min	-298.99	34.4365	8.7663	0.700991	0.0962622	0.0733184	0.0928301	4.52748	2.32857	2.18658	17.1502
	AD H0	FALSE	TRUE	TRUE	TRUE	TRUE	TRUE	TRUE	TRUE	FALSE	FALSE	TRUE				AD H0	TRUE	TRUE	TRUE	TRUE	TRUE	TRUE	TRUE	TRUE	TRUE	TRUE	TRUE
	JB H0	FALSE	FALSE	TRUE	TRUE	FALSE	TRUE	TRUE	TRUE	TRUE	FALSE	FALSE				JB H0	TRUE	FALSE	TRUE	FALSE	FALSE	TRUE	TRUE	TRUE	TRUE	TRUE	TRUE
Sec 05	Mean	-211.551	32.717	25.2054	3.21616	0.372661	0.433067	0.322871	8.53687	9.87835	16.3994	22.7786			Group 6	Mean	-79.0532	87.8847	24.193	2.45693	0.0532348	0.0787118	1.79178	61.3651	1.75137	-1.06351	1.45826
	Stddev	20.0651	2.66154	5.01977	1.08712	0.0451354	0.0778564	0.0767835	2.36557	1.95001	1.78463	3.27338				Stddev	40.5002	11.9787	5.92132	1.75987	0.0287418	0.0105885	1.08858	73.8094	2.05204	2.18668	5.39158
	Median	-203.336	32.4791	24.8983	2.83116	0.365528	0.426447	0.308149	7.88993	9.87787	15.8222	21.6163				Median	-68.285	85.1283	23.3554	1.58084	0.0459651	0.0792164	1.55532	34.5697	0.997159	-1.65426	-0.45564
	IQR	34.9169	4.136	7.63714	1.42938	0.0566412	0.0940094	0.115169	2.90417	1.87823	2.1723	2.89888				IQR	27.6911	20.8682	8.45387	1.94905	0.029582	0.0176761	0.665104	37.5949	0.612898	0.803617	1.3024
	Max	-174.163	39.6874	40.2941	6.34496	0.473685	0.695077	0.486793	15.3425	16.9306	21.5637	36.1692				Max	-20.4395	117.353	41.2415	8.31397	0.155769	0.101914	8.01437	444.786	10.4066	7.81863	32.7104
	Min	-251.376	26.5874	16.9449	1.29244	0.278504	0.333292	0.195724	3.87583	5.33083	13.359	18.426				Min	-222.225	65.5168	11.3276	0.742263	0.0112833	0.0580293	0.573949	14.1927	0.397031	-3.69438	-2.70465
	AD H0	TRUE	FALSE	FALSE	TRUE	TRUE	TRUE	TRUE	TRUE	TRUE	TRUE	TRUE				AD H0	TRUE	TRUE	TRUE	TRUE	TRUE	TRUE	TRUE	TRUE	TRUE	TRUE	TRUE
	JB H0	FALSE	FALSE	TRUE	TRUE	FALSE	TRUE	FALSE	TRUE	TRUE	TRUE	TRUE				JB H0	TRUE	TRUE	TRUE	TRUE	TRUE	TRUE	TRUE	TRUE	TRUE	TRUE	TRUE
Sec 06	Mean	-188.54	44.9904	34.4459	1.95231	0.259511	0.396349	0.16474	8.04147	13.1342	25.203	32.9521
	Stddev	22.5968	13.7551	6.12155	0.489976	0.0761599	0.142012	0.0693884	2.78347	4.4525	7.46142	9.3309
	Median	-186.493	43.9411	32.9411	1.9887	0.240505	0.369196	0.136949	7.54646	13.1266	24.8609	31.6822
	IQR	42.2664	16.4471	8.99023	0.594594	0.113148	0.218918	0.0801911	4.71445	7.37517	9.6896	10.9967
	Max	-153.649	78.6764	50.8494	3.11534	0.45489	0.701527	0.352576	14.0815	25.5729	48.6513	63.722
	Min	-228.347	26.0263	26.0909	0.953814	0.142747	0.159153	0.082504	3.55718	5.4269	15.9879	21.2258
	AD H0	TRUE	TRUE	TRUE	FALSE	TRUE	TRUE	TRUE	TRUE	TRUE	TRUE	TRUE
	JB H0	TRUE	TRUE	TRUE	FALSE	TRUE	FALSE	TRUE	TRUE	FALSE	TRUE	TRUE
Sec 07	Mean	-170.708	53.7015	24.1663	3.69671	0.183856	0.395953	0.0838217	20.3779	46.9997	34.9287	43.7195
	Stddev	12.9548	5.28381	3.4702	0.341555	0.0220051	0.127962	0.0221402	2.96998	11.7076	2.75181	3.37894
	Median	-167.368	54.7379	24.7418	3.71873	0.183075	0.343612	0.0775269	20.3217	49.2285	35.2287	43.8363
	IQR	12.3302	5.92187	4.79413	0.401125	0.0328042	0.124013	0.0216693	5.09133	16.0439	2.97602	4.64607
	Max	-147.67	69.2353	32.7031	4.79331	0.234179	0.751688	0.135077	28.1624	73.14	42.2632	52.6741
	Min	-210.798	41.739	16.9651	2.7797	0.125936	0.245087	0.0421793	15.1339	23.8198	26.8281	37.7572
	AD H0	TRUE	TRUE	FALSE	FALSE	FALSE	TRUE	TRUE	TRUE	TRUE	TRUE	FALSE
	JB H0	TRUE	FALSE	FALSE	FALSE	FALSE	TRUE	TRUE	FALSE	FALSE	TRUE	FALSE
Sec 08	Mean	-165.34	43.0125	21.4682	3.67719	0.225484	0.246241	0.24693	16.513	19.8186	13.4936	32.3308
	Stddev	17.5185	8.13485	3.06265	0.509888	0.0341438	0.0635797	0.151117	2.58005	10.3077	7.63994	5.96953
	Median	-162.892	44.5724	20.9719	3.71084	0.224348	0.242338	0.183165	15.6942	19.5276	13.9272	31.6342
	IQR	22.3201	9.27913	3.64322	0.445151	0.0429798	0.0407118	0.163486	3.27738	11.4822	10.0948	6.83738
	Max	-140.166	70.2857	31.3744	4.58433	0.312162	0.57272	0.736881	22.5156	59.6352	41.5001	51.4079
	Min	-222.101	30.612	16.8333	1.58983	0.130146	0.123021	0.0491374	9.50678	4.69185	3.77377	23.5037
	AD H0	TRUE	TRUE	TRUE	TRUE	FALSE	TRUE	TRUE	TRUE	TRUE	TRUE	TRUE
	JB H0	TRUE	TRUE	TRUE	TRUE	FALSE	TRUE	TRUE	FALSE	TRUE	TRUE	TRUE
Sec 09	Mean	-200.081	42.8364	20.5514	2.69225	0.27591	0.208904	0.554792	10.7444	6.63023	8.99654	27.6894
	Stddev	33.6042	6.16568	4.01524	0.873969	0.075457	0.0357165	0.239276	5.14871	4.95308	3.25778	5.07408
	Median	-199.795	43.8242	19.7817	2.53201	0.248114	0.204585	0.556841	10.3194	4.54515	8.31895	28.1657
	IQR	67.3193	9.15928	5.34771	1.11565	0.142257	0.0460642	0.457667	6.64636	7.32781	4.02191	5.99618
	Max	-158.076	66.0267	36.6227	4.98733	0.42263	0.29298	0.895776	23.7785	20.3943	18.7878	48.2873
	Min	-256.593	33.1227	14.619	0.975858	0.172703	0.145547	0.181203	2.89508	1.66274	3.49353	20.5235
	AD H0	TRUE	TRUE	TRUE	TRUE	TRUE	TRUE	TRUE	TRUE	TRUE	TRUE	TRUE
	JB H0	TRUE	TRUE	TRUE	FALSE	TRUE	FALSE	TRUE	TRUE	TRUE	FALSE	TRUE
Sec 10	Mean	-176.754	27.2877	19.7278	3.37925	0.372098	0.320119	0.601671	8.37825	5.9358	5.1823	14.6381
	Stddev	45.1084	3.40289	6.37679	2.29227	0.083781	0.049749	0.183471	4.83841	3.7463	3.9708	2.78309
	Median	-190.059	27.0086	15.0633	3.52551	0.387078	0.33072	0.583229	8.02701	7.57569	8.17627	16.2047
	IQR	79.3391	3.72777	11.8774	4.78548	0.130111	0.0652507	0.29588	9.17841	7.30146	7.68276	5.26109
	Max	-114.815	35.7801	30.7124	6.4236	0.490919	0.390989	0.835148	15.8161	11.3752	8.98783	17.5349
	Min	-240.597	21.2348	13.6125	0.640037	0.183856	0.18902	0.1426	2.90802	1.28002	-0.594153	10.4281
	AD H0	TRUE	FALSE	TRUE	TRUE	FALSE	FALSE	FALSE	TRUE	TRUE	TRUE	TRUE
	JB H0	FALSE	FALSE	FALSE	FALSE	FALSE	FALSE	FALSE	FALSE	FALSE	FALSE	FALSE
Sec 11	Mean	-150.871	23.0072	23.8671	2.81845	0.401995	0.369255	0.649342	7.37796	4.63273	2.69058	11.7419
	Stddev	20.8029	7.27083	6.41787	2.35311	0.102555	0.108312	0.172775	6.5407	3.80629	1.6891	2.64735
	Median	-149.397	21.6849	25.0634	1.33406	0.392209	0.349625	0.640836	3.60848	2.48481	2.30202	10.8165
	IQR	18.5547	8.05951	9.05866	3.75511	0.150213	0.131765	0.193692	8.49796	6.35661	1.58323	3.28577
	Max	-117.457	49.6674	41.3229	9.52278	0.62315	0.610807	1.01533	25.6378	16.337	9.76797	21.0192
	Min	-212.621	13.5217	10.8177	0.658708	0.17338	0.17232	0.0733362	1.90017	1.14031	0.143471	8.84862
	AD H0	TRUE	TRUE	FALSE	TRUE	FALSE	TRUE	TRUE	TRUE	TRUE	TRUE	TRUE
	JB H0	TRUE	TRUE	FALSE	TRUE	FALSE	FALSE	TRUE	TRUE	TRUE	TRUE	TRUE
Sec 12	Mean	-130.255	29.0961	16.5422	6.53535	0.256874	0.248358	1.79056	26.319	8.05425	1.12845	10.9802
	Stddev	34.0001	2.69653	5.02017	2.18095	0.0616386	0.0241293	3.99554	9.40167	8.07827	2.30461	1.311
	Median	-117.032	29.281	15.7453	6.23855	0.247623	0.256833	0.941673	25.6275	6.24419	-0.0750482	10.8231
	IQR	48.8749	3.36621	7.87548	3.00113	0.090326	0.0363237	0.828793	12.8688	5.73989	3.77501	1.63015
	Max	-93.5446	38.7016	27.0886	11.7479	0.404268	0.287847	32.4207	54.898	53.2932	6.16126	15.5859
	Min	-212.386	23.3567	8.79005	2.55255	0.162788	0.182262	0.0568239	12.5153	0.21223	-1.20493	8.91889
	AD H0	TRUE	FALSE	TRUE	TRUE	TRUE	TRUE	TRUE	TRUE	TRUE	TRUE	TRUE
	JB H0	TRUE	TRUE	FALSE	FALSE	TRUE	TRUE	TRUE	TRUE	TRUE	TRUE	TRUE
Sec 13	Mean	-110.262	37.3691	29.6926	2.2623	0.170848	0.185742	1.22023	13.219	2.82785	-0.234002	10.2046
	Stddev	19.1806	5.25362	6.92754	1.11363	0.0296661	0.0225637	0.600983	6.12465	3.75245	1.2765	3.05834
	Median	-108.728	36.3151	28.2038	1.89724	0.177003	0.188344	1.12383	11.2028	1.65043	-0.540296	9.64194
	IQR	18.8642	6.7198	7.19317	0.706965	0.0343137	0.0334303	0.719592	4.87072	1.55575	1.18551	3.46117
	Max	-59.9264	51.3889	51.7748	7.33758	0.236991	0.227994	3.0874	48.5121	22.7172	5.51966	22.7399
	Min	-161.989	30.3441	10.7945	0.968178	0.0882456	0.13707	0.0960624	6.40536	0.484566	-2.43419	4.83557
	AD H0	TRUE	TRUE	TRUE	TRUE	TRUE	TRUE	FALSE	TRUE	TRUE	TRUE	TRUE
	JB H0	FALSE	TRUE	TRUE	TRUE	FALSE	FALSE	TRUE	TRUE	TRUE	TRUE	TRUE
Sec 14	Mean	-129.528	29.8994	18.0403	5.81945	0.262938	0.251915	0.650172	21.2958	10.3341	0.885461	10.0331
	Stddev	9.20083	7.73037	5.57132	2.953	0.0617513	0.0594744	0.209463	7.94523	6.50392	0.902115	1.92315
	Median	-127.797	28.9766	17.2118	6.28854	0.267016	0.245393	0.680201	21.1062	9.61396	0.712668	9.6762
	IQR	12.9597	12.1666	4.09396	3.34159	0.11282	0.115468	0.281784	9.20067	9.38127	1.01723	2.77183
	Max	-116.784	48.4665	38.5361	12.187	0.371976	0.331275	1.19937	37.6526	28.614	3.9011	15.9362
	Min	-162.694	21.1498	8.06585	1.41599	0.148023	0.148624	0.141585	6.53679	1.62238	-0.211117	7.55019
	AD H0	TRUE	TRUE	TRUE	TRUE	TRUE	TRUE	FALSE	FALSE	TRUE	TRUE	TRUE
	JB H0	TRUE	TRUE	TRUE	FALSE	FALSE	FALSE	FALSE	FALSE	TRUE	TRUE	TRUE
Sec 15	Mean	-190.449	35.887	23.4505	6.83276	0.324458	0.249776	0.710763	21.7727	9.95441	5.73221	12.0711
	Stddev	36.9107	11.303	15.161	2.79705	0.0928245	0.0616427	0.146331	9.5572	4.54924	2.84858	3.68293
	Median	-205.297	32.8266	14.8338	7.65495	0.356584	0.269845	0.719983	21.1009	10.1633	7.19647	13.0281
	IQR	71.5967	3.21274	23.5583	4.58931	0.141006	0.057431	0.109691	7.89222	6.88836	5.39764	5.28722
	Max	-118.889	79.6289	59.3496	11.1881	0.490666	0.360746	1.23872	51.3055	21.6218	9.52081	21.5825
	Min	-240.273	25.2933	9.27497	1.03649	0.12946	0.0943308	0.257083	4.02582	1.78019	0.0513888	5.34583
	AD H0	TRUE	TRUE	TRUE	TRUE	TRUE	TRUE	TRUE	TRUE	FALSE	TRUE	TRUE
	JB H0	FALSE	TRUE	TRUE	FALSE	FALSE	TRUE	TRUE	TRUE	FALSE	FALSE	FALSE
Sec 16	Mean	-213.909	45.2744	45.3501	1.6616	0.276844	0.198568	0.599254	6.51053	2.9073	9.38064	22.0474
	Stddev	33.9686	7.78262	6.48065	0.94368	0.0545291	0.0377255	0.113742	6.08073	2.21568	4.28991	7.75605
	Median	-209.501	43.4465	44.1611	1.43401	0.274049	0.193686	0.628776	5.28844	2.27493	7.36673	20.1361
	IQR	50.7273	7.98235	8.35915	0.352299	0.0573626	0.0332125	0.176257	1.21155	0.702976	5.17907	8.0141
	Max	-154.719	66.0376	57.5236	5.9401	0.389926	0.293145	0.761049	35.233	13.6127	21.4777	39.8701
	Min	-284.464	26.8995	27.308	0.657422	0.158551	0.125662	0.31904	3.54508	1.9067	3.44545	6.86691
	AD H0	TRUE	TRUE	FALSE	TRUE	FALSE	TRUE	TRUE	TRUE	TRUE	TRUE	TRUE
	JB H0	FALSE	TRUE	FALSE	TRUE	FALSE	FALSE	FALSE	TRUE	TRUE	TRUE	FALSE
Sec 17	Mean	-268.747	58.8352	20.3436	4.7658	0.281345	0.189866	0.497217	18.3091	9.82155	17.3859	26.3443
	Stddev	19.3286	15.4529	9.04381	2.53745	0.0790838	0.0772492	0.0587014	11.3058	5.79504	3.03794	4.84376
	Median	-268.001	60.9565	18.9979	4.21613	0.249995	0.151599	0.502332	14.5668	8.05369	17.2681	26.41
	IQR	30.5207	28.6953	5.06743	3.75425	0.117742	0.11134	0.0578845	15.1024	8.94283	5.39468	6.78089
	Max	-210.102	89.5169	54.1349	11.1551	0.444837	0.357513	0.620907	50.6689	23.9887	23.2009	46.5423
	Min	-298.99	34.4365	8.7663	0.700991	0.15483	0.103678	0.30104	4.52748	2.32857	12.6518	19.3094
	AD H0	FALSE	TRUE	TRUE	TRUE	TRUE	TRUE	TRUE	TRUE	TRUE	TRUE	TRUE
	JB H0	FALSE	TRUE	TRUE	TRUE	TRUE	TRUE	TRUE	TRUE	TRUE	FALSE	TRUE
Sec 18	Mean	-221.716	66.509	15.0362	6.5554	0.200922	0.138556	0.431518	38.6156	19.9745	13.6411	22.0781
	Stddev	51.1155	11.2887	2.79388	1.6343	0.0674925	0.0331222	0.180155	22.7252	15.954	4.59335	2.85241
	Median	-244.162	60.6705	14.7099	6.64434	0.23881	0.144678	0.467369	27.6461	14.249	13.4428	21.5814
	IQR	89.8698	20.7842	3.92702	1.45784	0.134149	0.0602037	0.289998	31.3712	4.3423	4.82828	1.54685
	Max	-140.271	96.7398	23.2259	11.1519	0.287561	0.186575	0.843936	101.994	80.3662	20.9744	30.4002
	Min	-294.504	54.7163	9.68351	2.24005	0.0962622	0.0733184	0.0928301	15.21	8.13749	2.18658	17.1502
	AD H0	TRUE	TRUE	FALSE	FALSE	TRUE	TRUE	TRUE	TRUE	TRUE	TRUE	TRUE
	JB H0	FALSE	FALSE	FALSE	FALSE	TRUE	FALSE	FALSE	TRUE	TRUE	FALSE	TRUE
Sec 19	Mean	-135.615	80.1719	20.9423	3.66335	0.0955817	0.0884339	1.04131	36.2854	4.19149	1.542	8.76281
	Stddev	52.4034	11.2851	4.71671	2.4188	0.0309698	0.00880785	0.298682	18.987	3.32687	3.54408	8.0671
	Median	-98.8258	75.8877	23.2681	1.82729	0.0790536	0.0912259	0.943781	24.8213	2.53053	-0.918128	8.02183
	IQR	105.059	10.6144	7.55174	4.3503	0.0471135	0.00924249	0.497994	27.9501	6.02488	7.03853	9.52864
	Max	-85.9474	112.38	27.6321	8.31397	0.155769	0.0989801	1.55532	101.491	10.4066	7.81863	32.7104
	Min	-222.225	68.7635	11.3276	1.40275	0.0628232	0.0651465	0.573949	14.1927	1.06765	-1.56145	0.742743
	AD H0	TRUE	TRUE	TRUE	TRUE	TRUE	TRUE	TRUE	TRUE	TRUE	TRUE	TRUE
	JB H0	TRUE	TRUE	FALSE	FALSE	TRUE	TRUE	FALSE	TRUE	FALSE	TRUE	TRUE
Sec 20	Mean	-63.2686	90.0371	25.1002	2.12026	0.0414171	0.0759986	2.00121	68.3641	1.07041	-1.79062	-0.58022
	Stddev	14.136	11.2971	5.91934	1.35825	0.0122909	0.00940401	1.13635	81.5793	0.476209	0.49971	0.505617
	Median	-63.7345	88.4854	23.446	1.48039	0.0413152	0.0766444	1.70574	35.0399	0.928925	-1.81503	-0.608865
	IQR	17.0418	19.1927	10.5646	1.30703	0.0164916	0.0158188	0.696265	53.9663	0.357828	0.506618	0.523647
	Max	-20.4395	117.353	41.2415	5.87179	0.0705932	0.101914	8.01437	444.786	2.84988	-0.608181	0.839947
	Min	-93.4613	65.5168	16.5775	0.742263	0.0112833	0.0580293	0.99232	15.7792	0.397031	-3.69438	-2.70465
	AD H0	TRUE	TRUE	TRUE	TRUE	FALSE	TRUE	TRUE	TRUE	TRUE	TRUE	TRUE
	JB H0	TRUE	FALSE	TRUE	TRUE	FALSE	FALSE	TRUE	TRUE	TRUE	TRUE	TRUE
